# Supplementary material for: Wetting-mediated collective tubulation and pearling in confined vesicular drops of DDAB solutions
Source: Royal Society of Chemistry journal article supplement (doi:10.1039/c4sm01579g), 2014-01-01

Stack Image Sequence S1:  
from t ~0s to 10 min.  
image size: 1288  $\mu\text{m}$ x970  $\mu\text{m}$

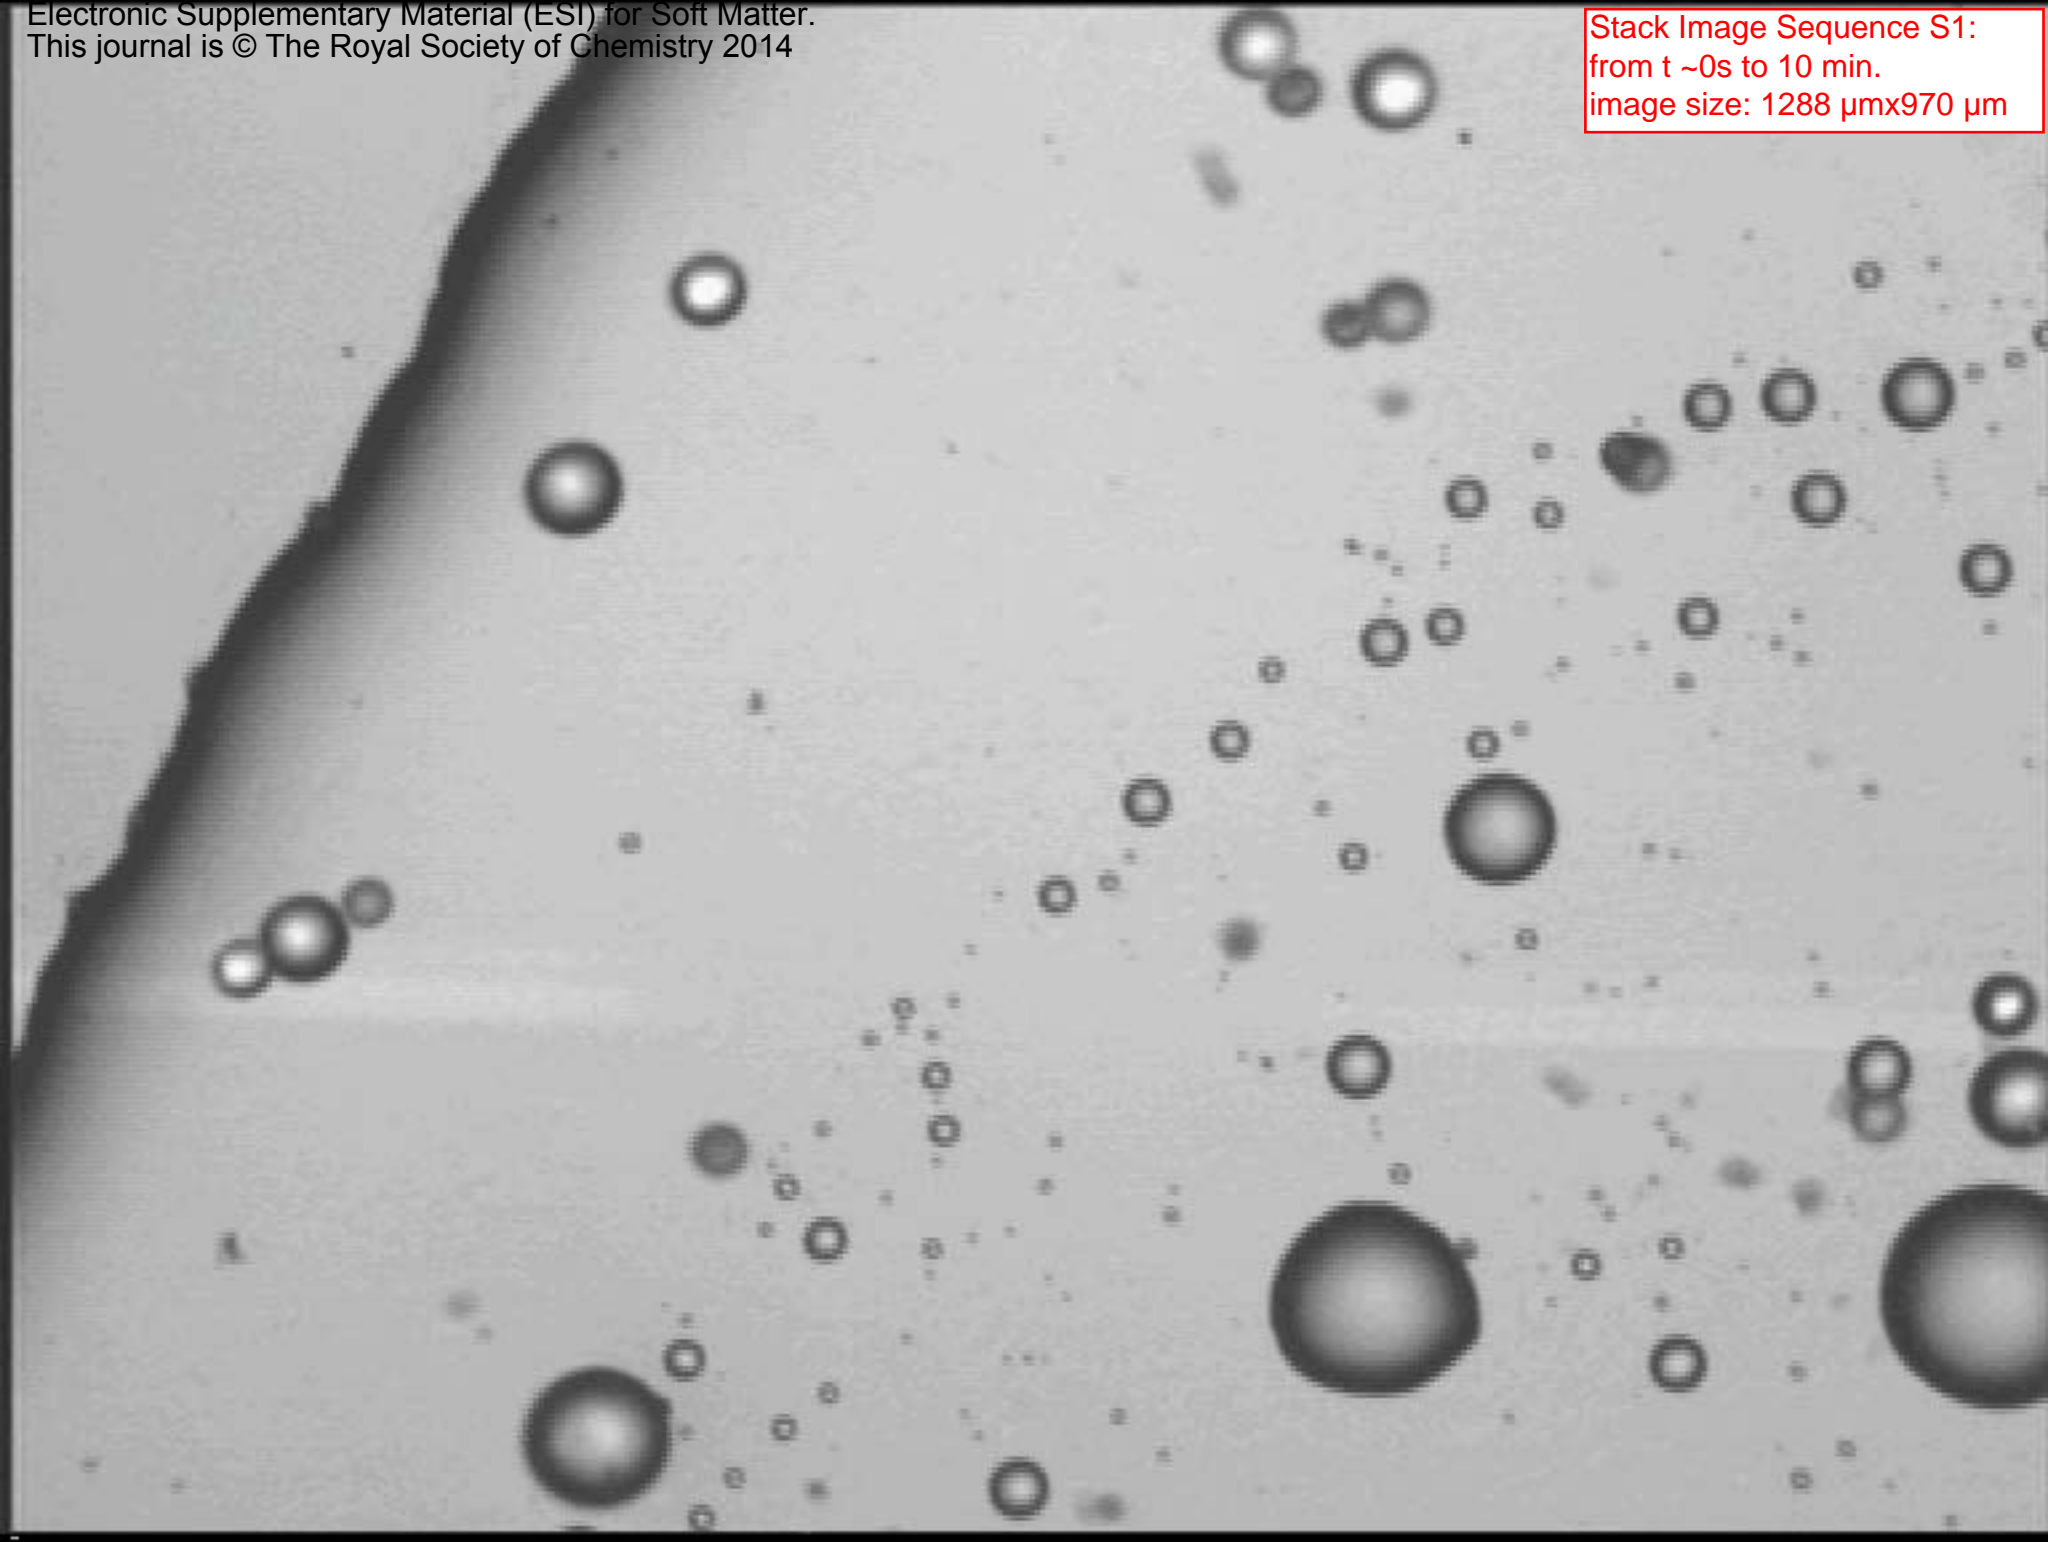

Stack Image Sequence S1:  
from t=0s to 8 min.

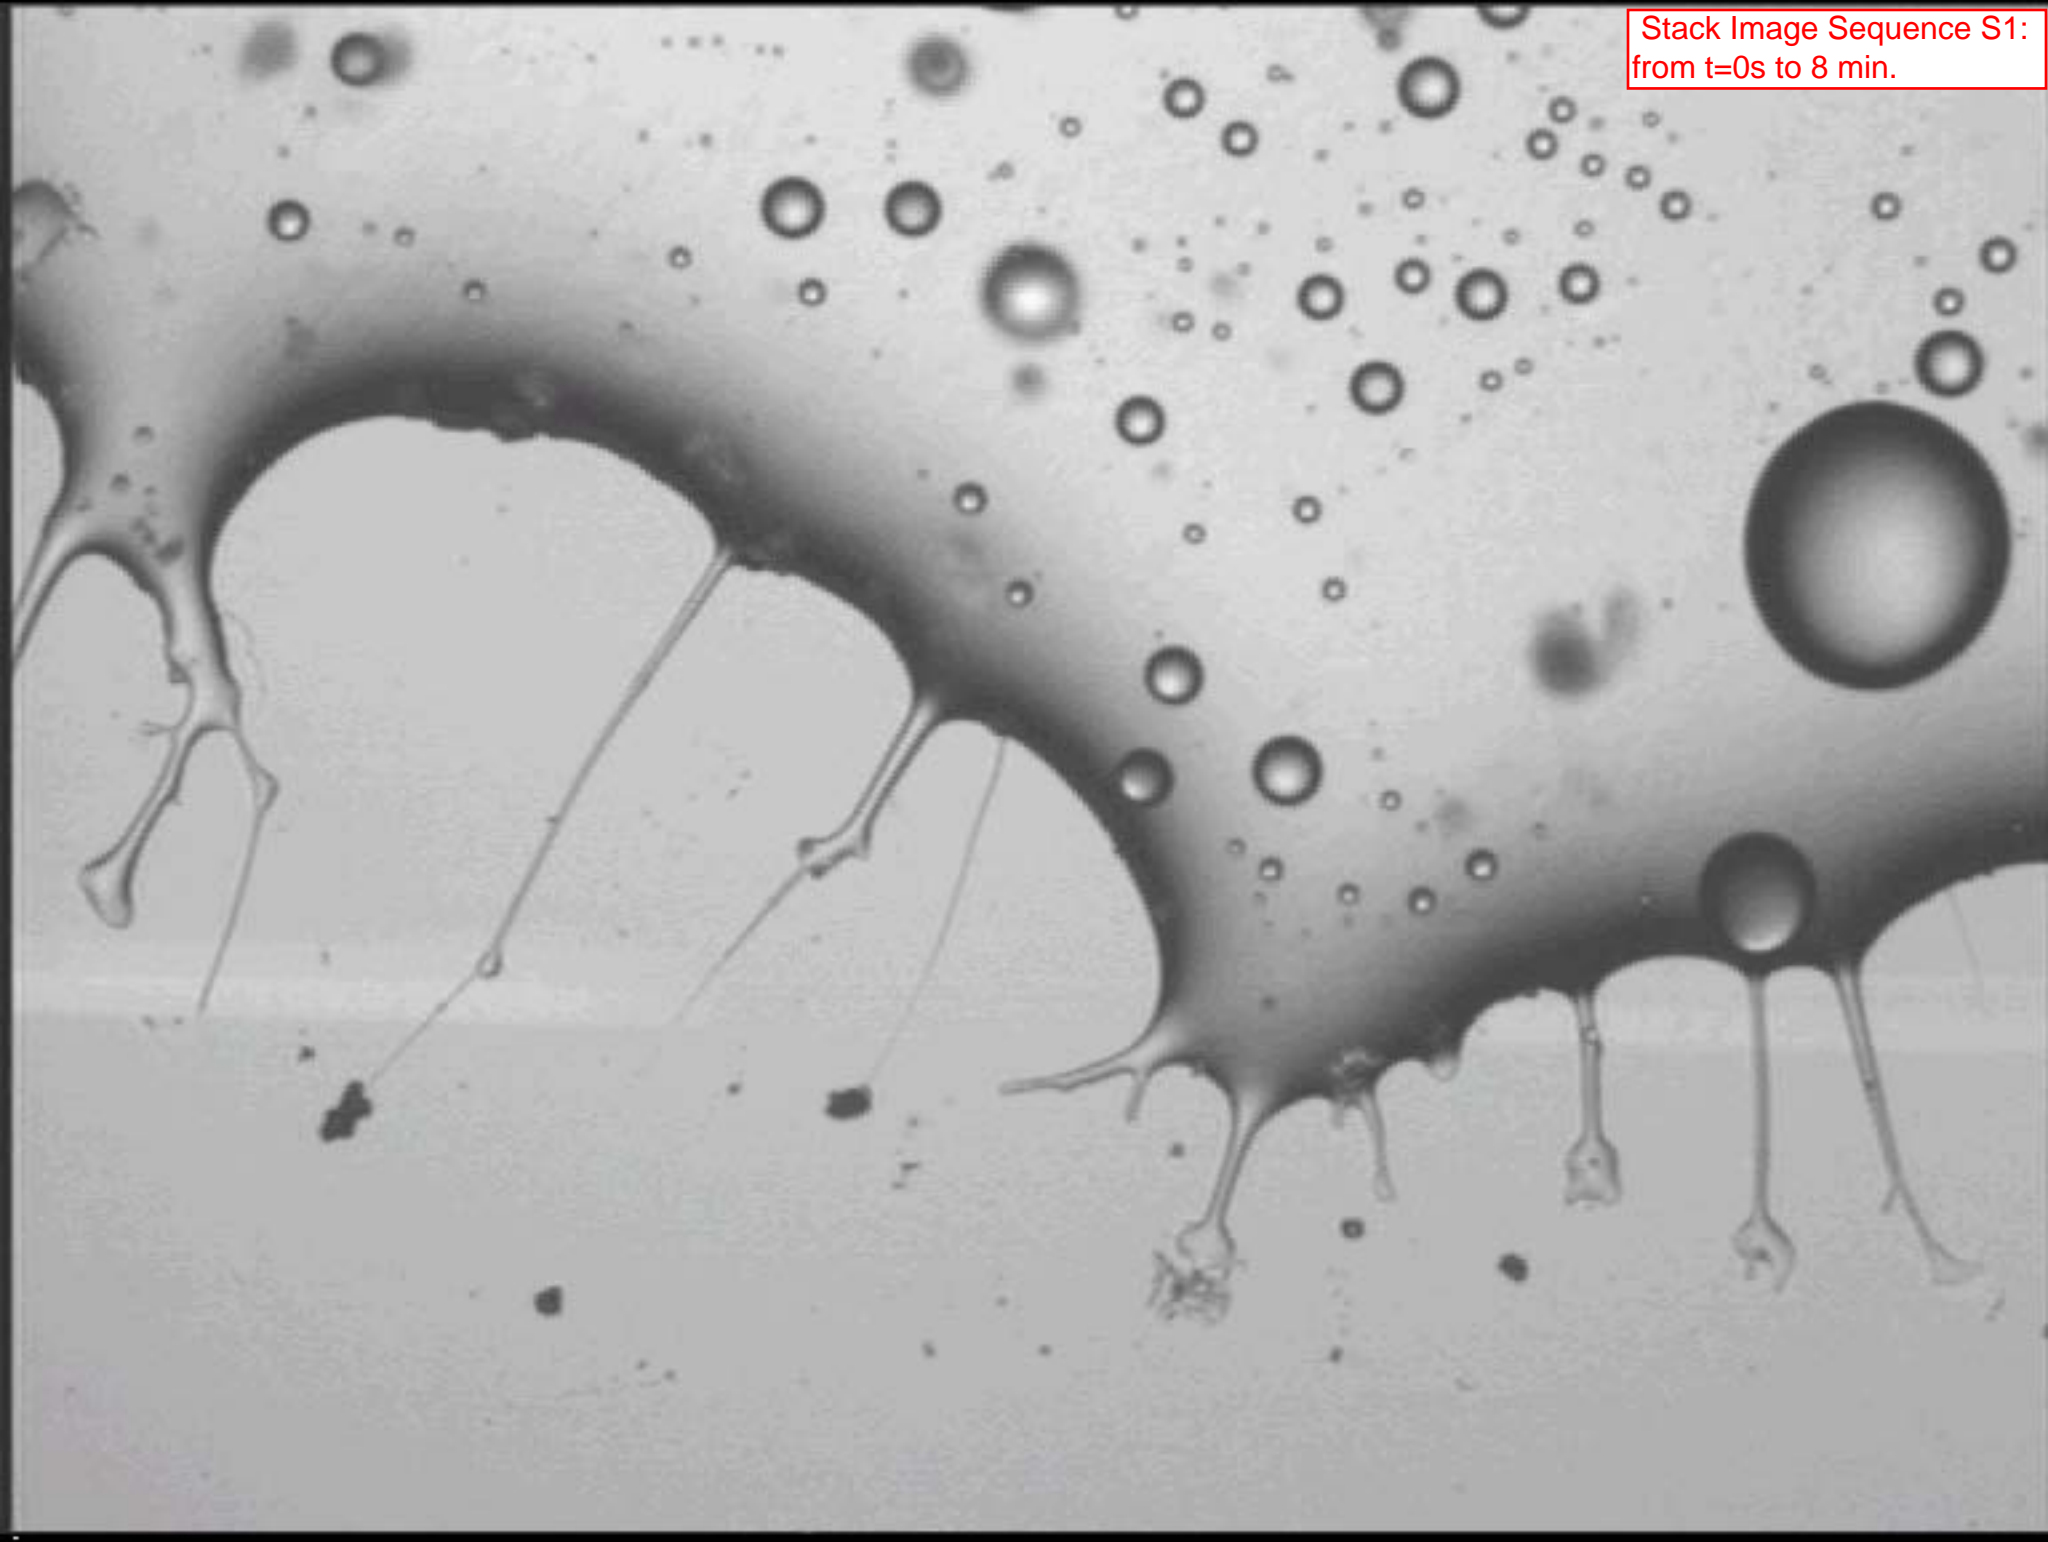

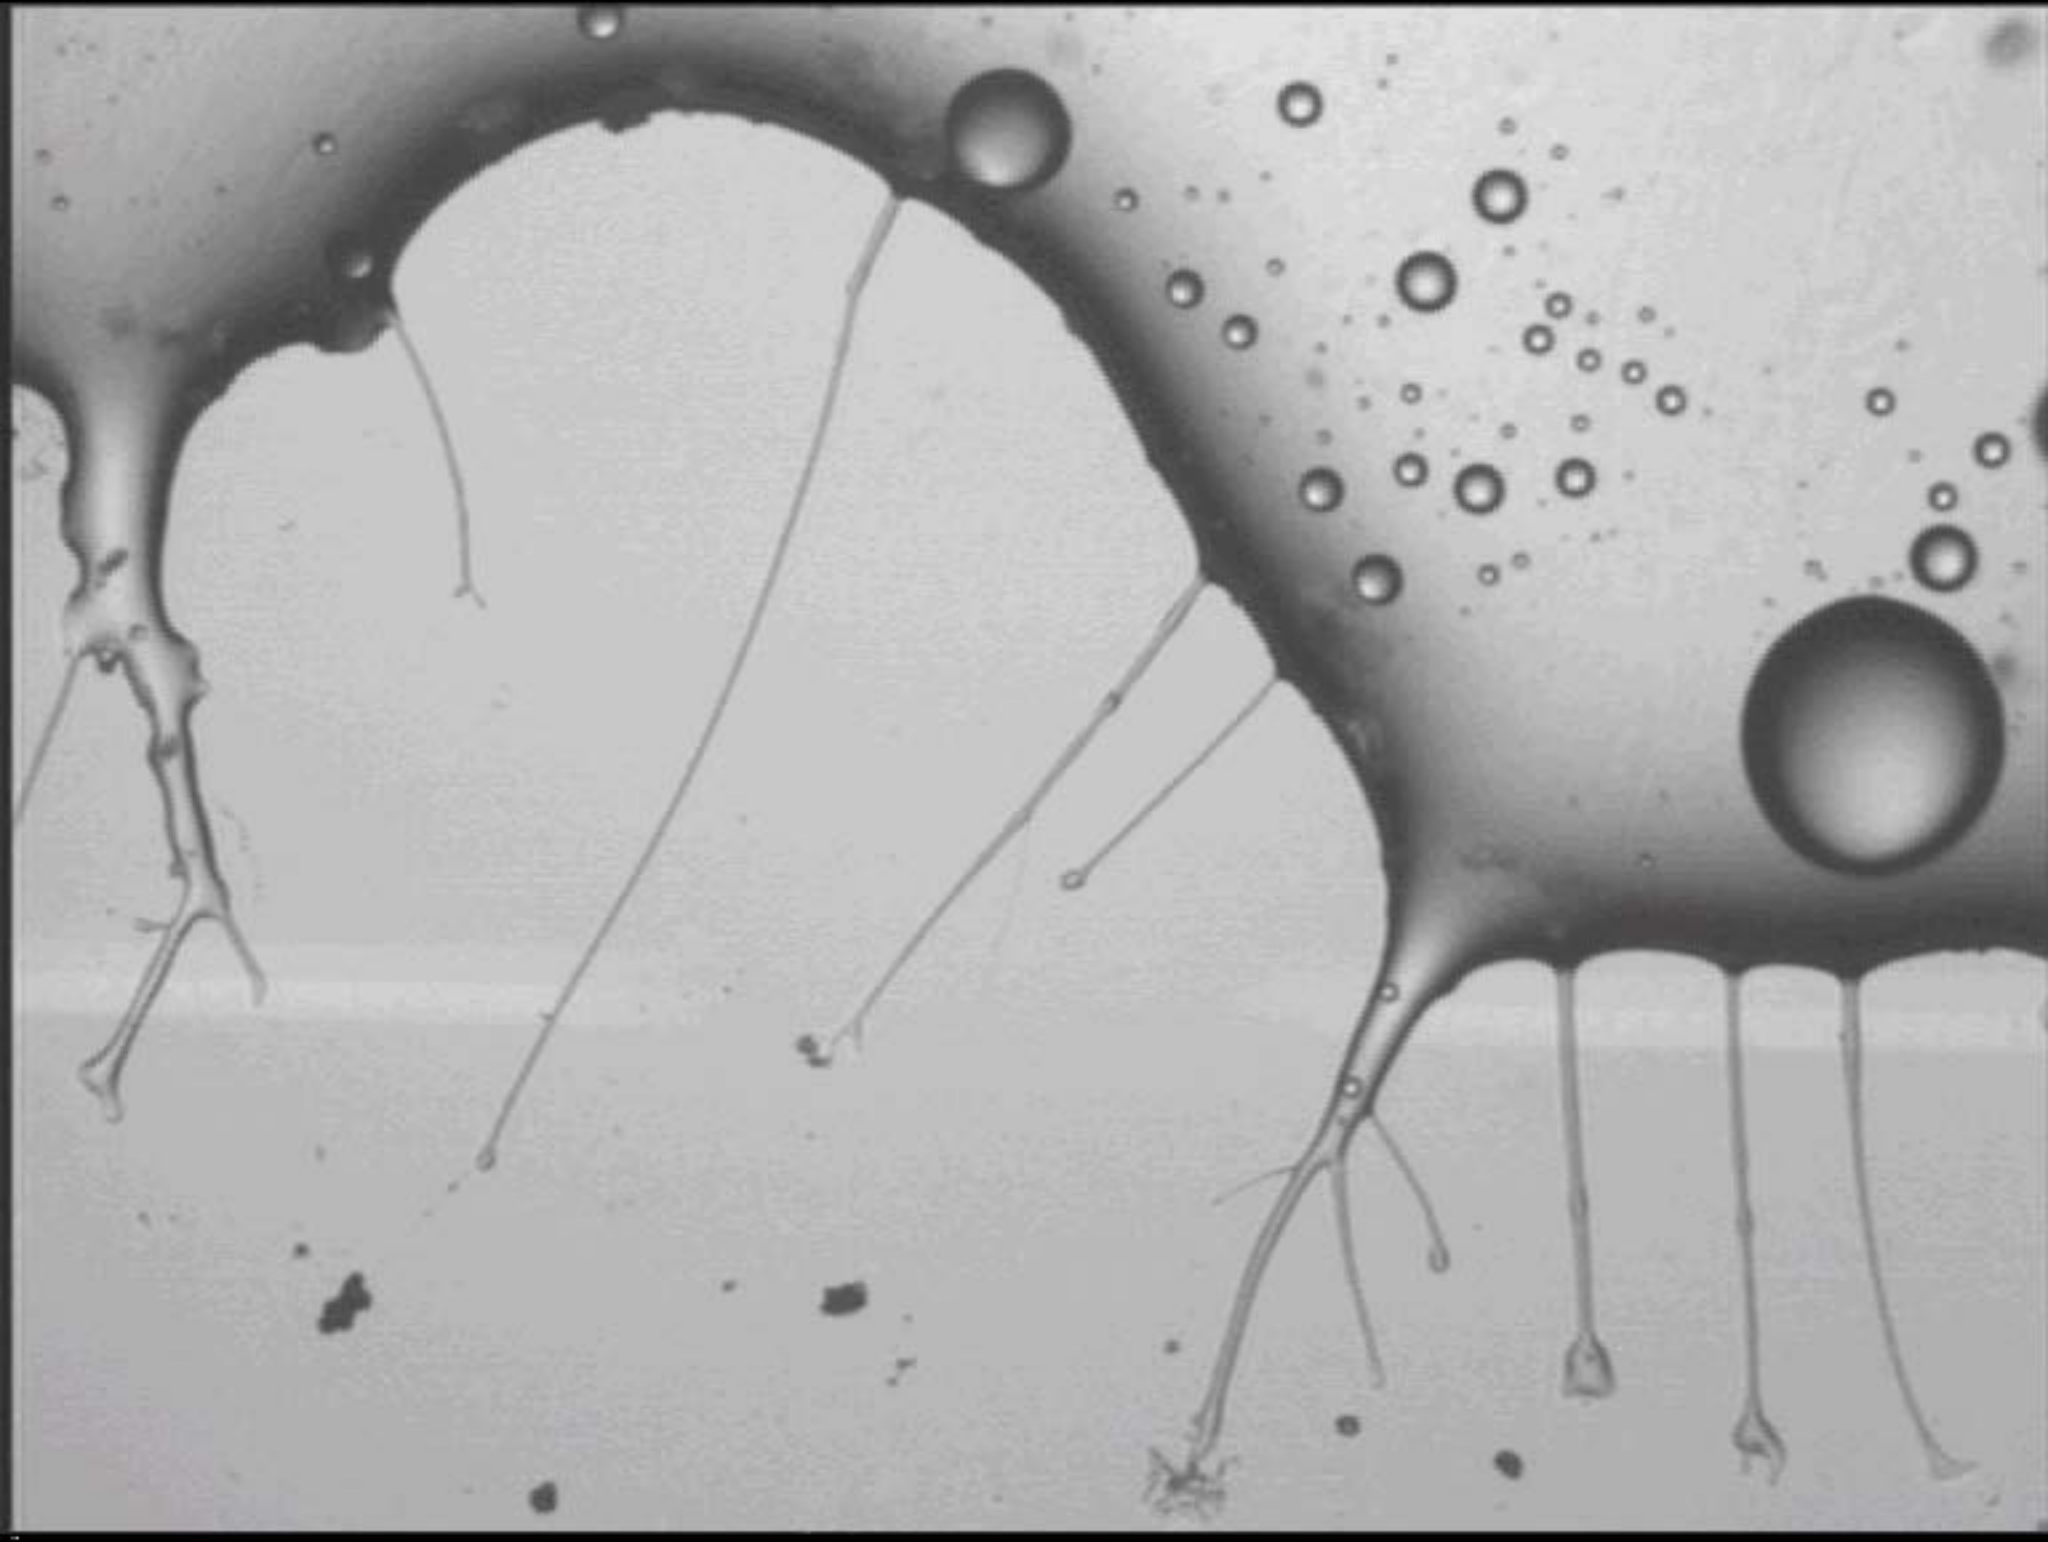

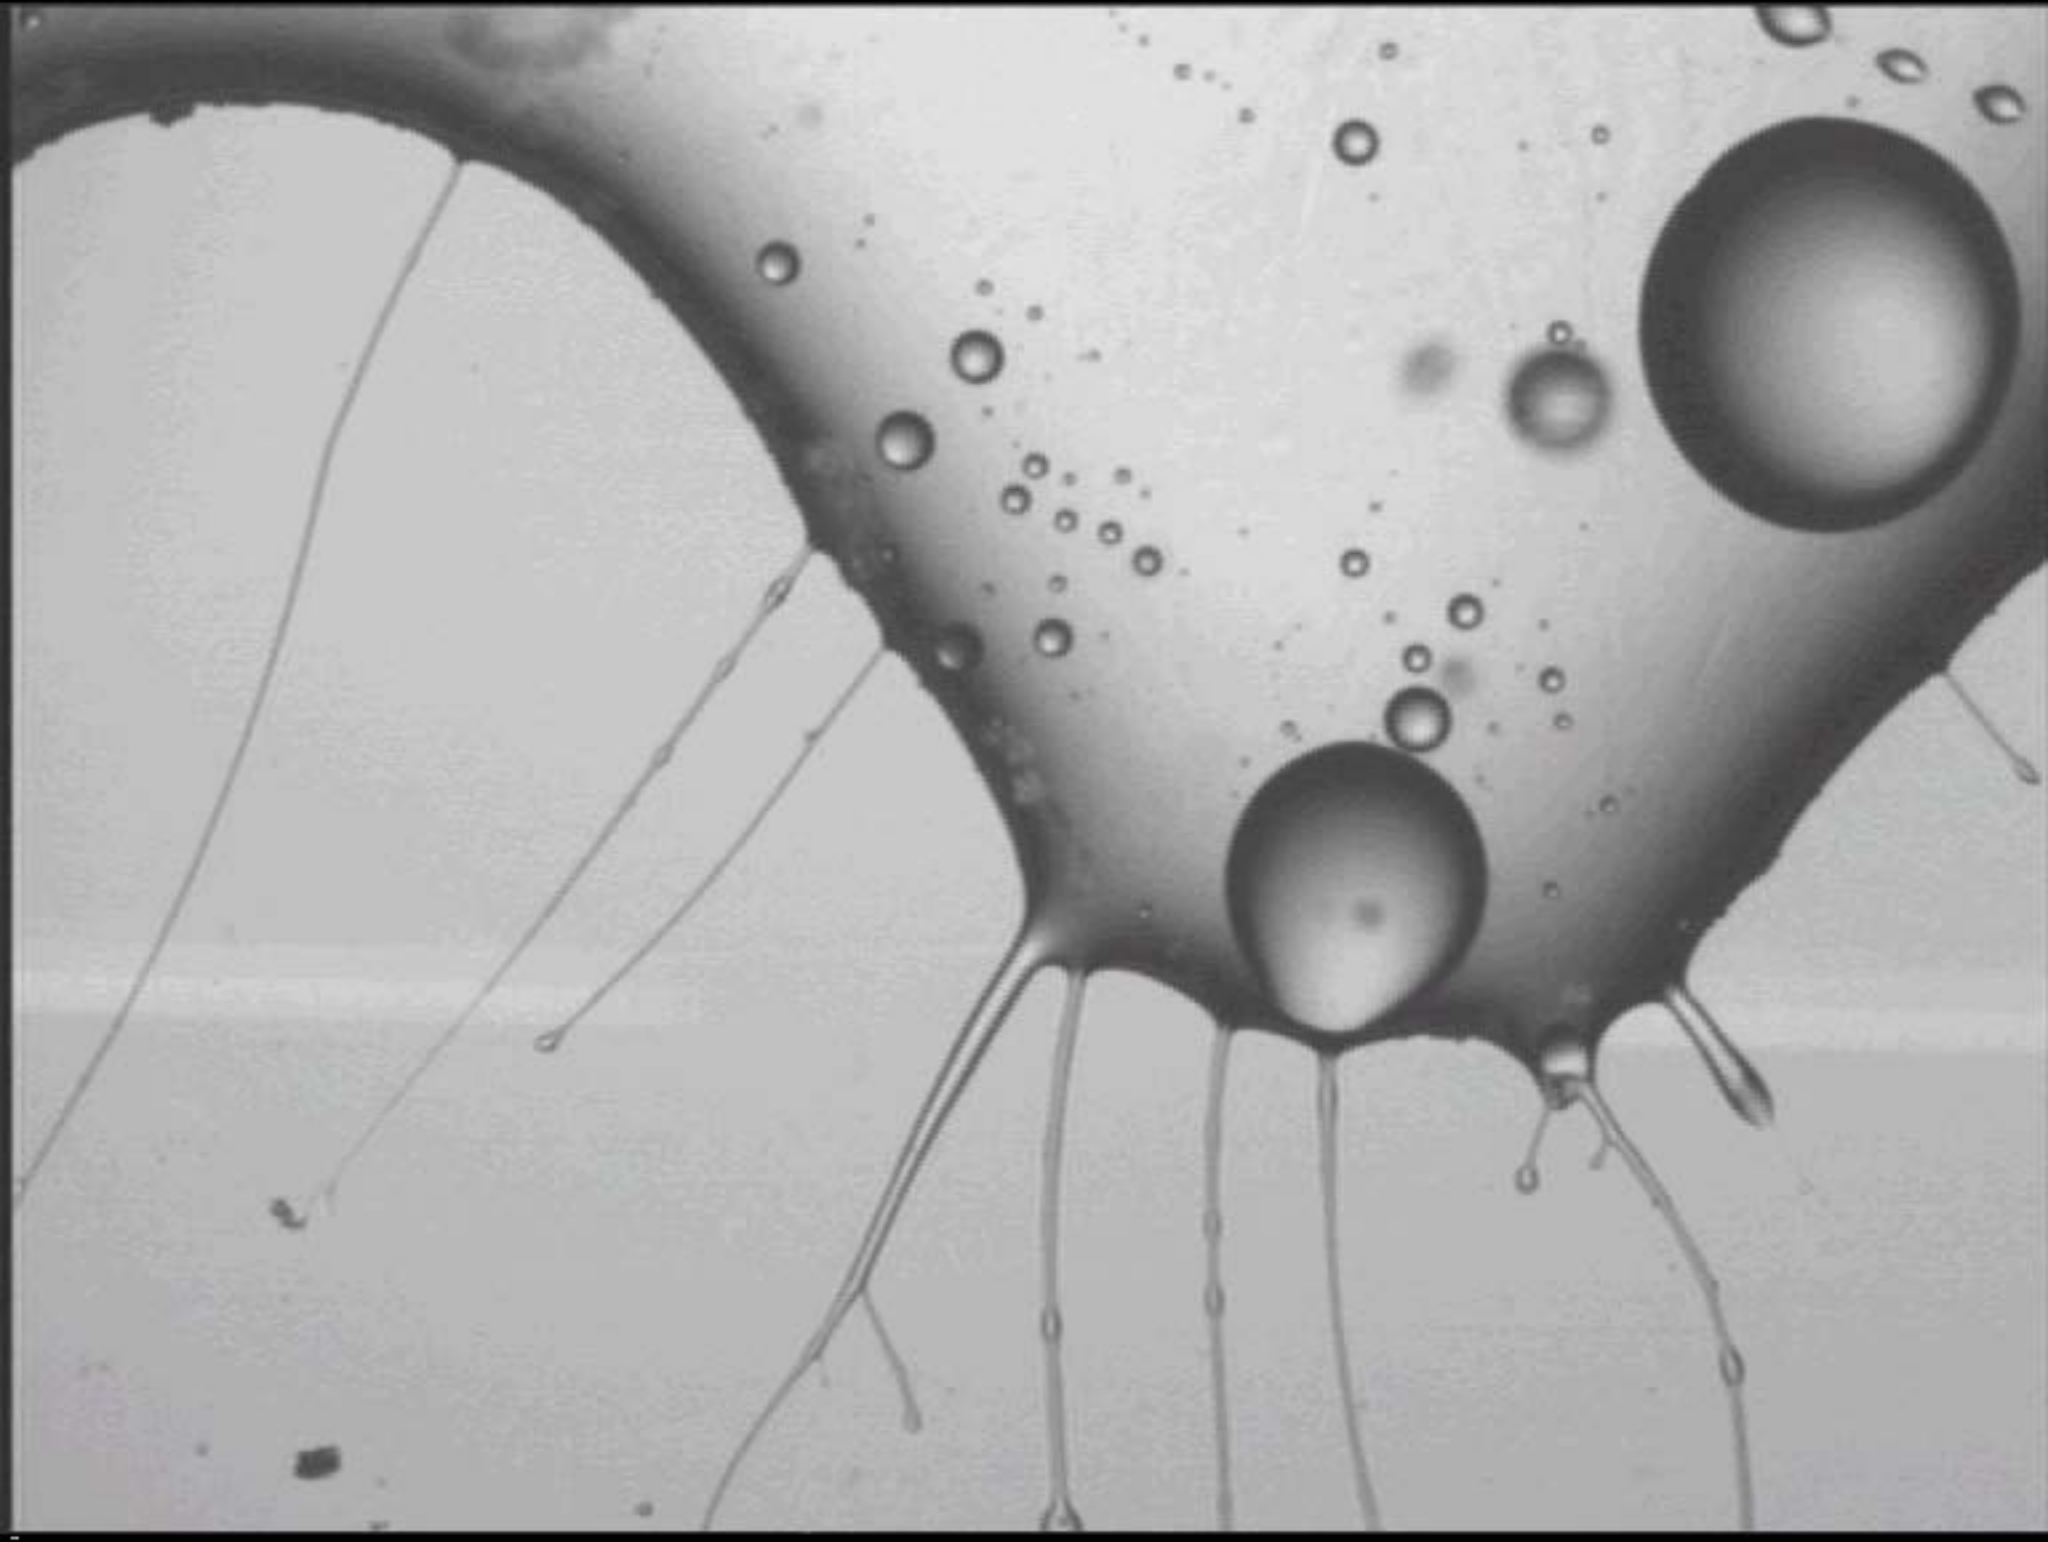

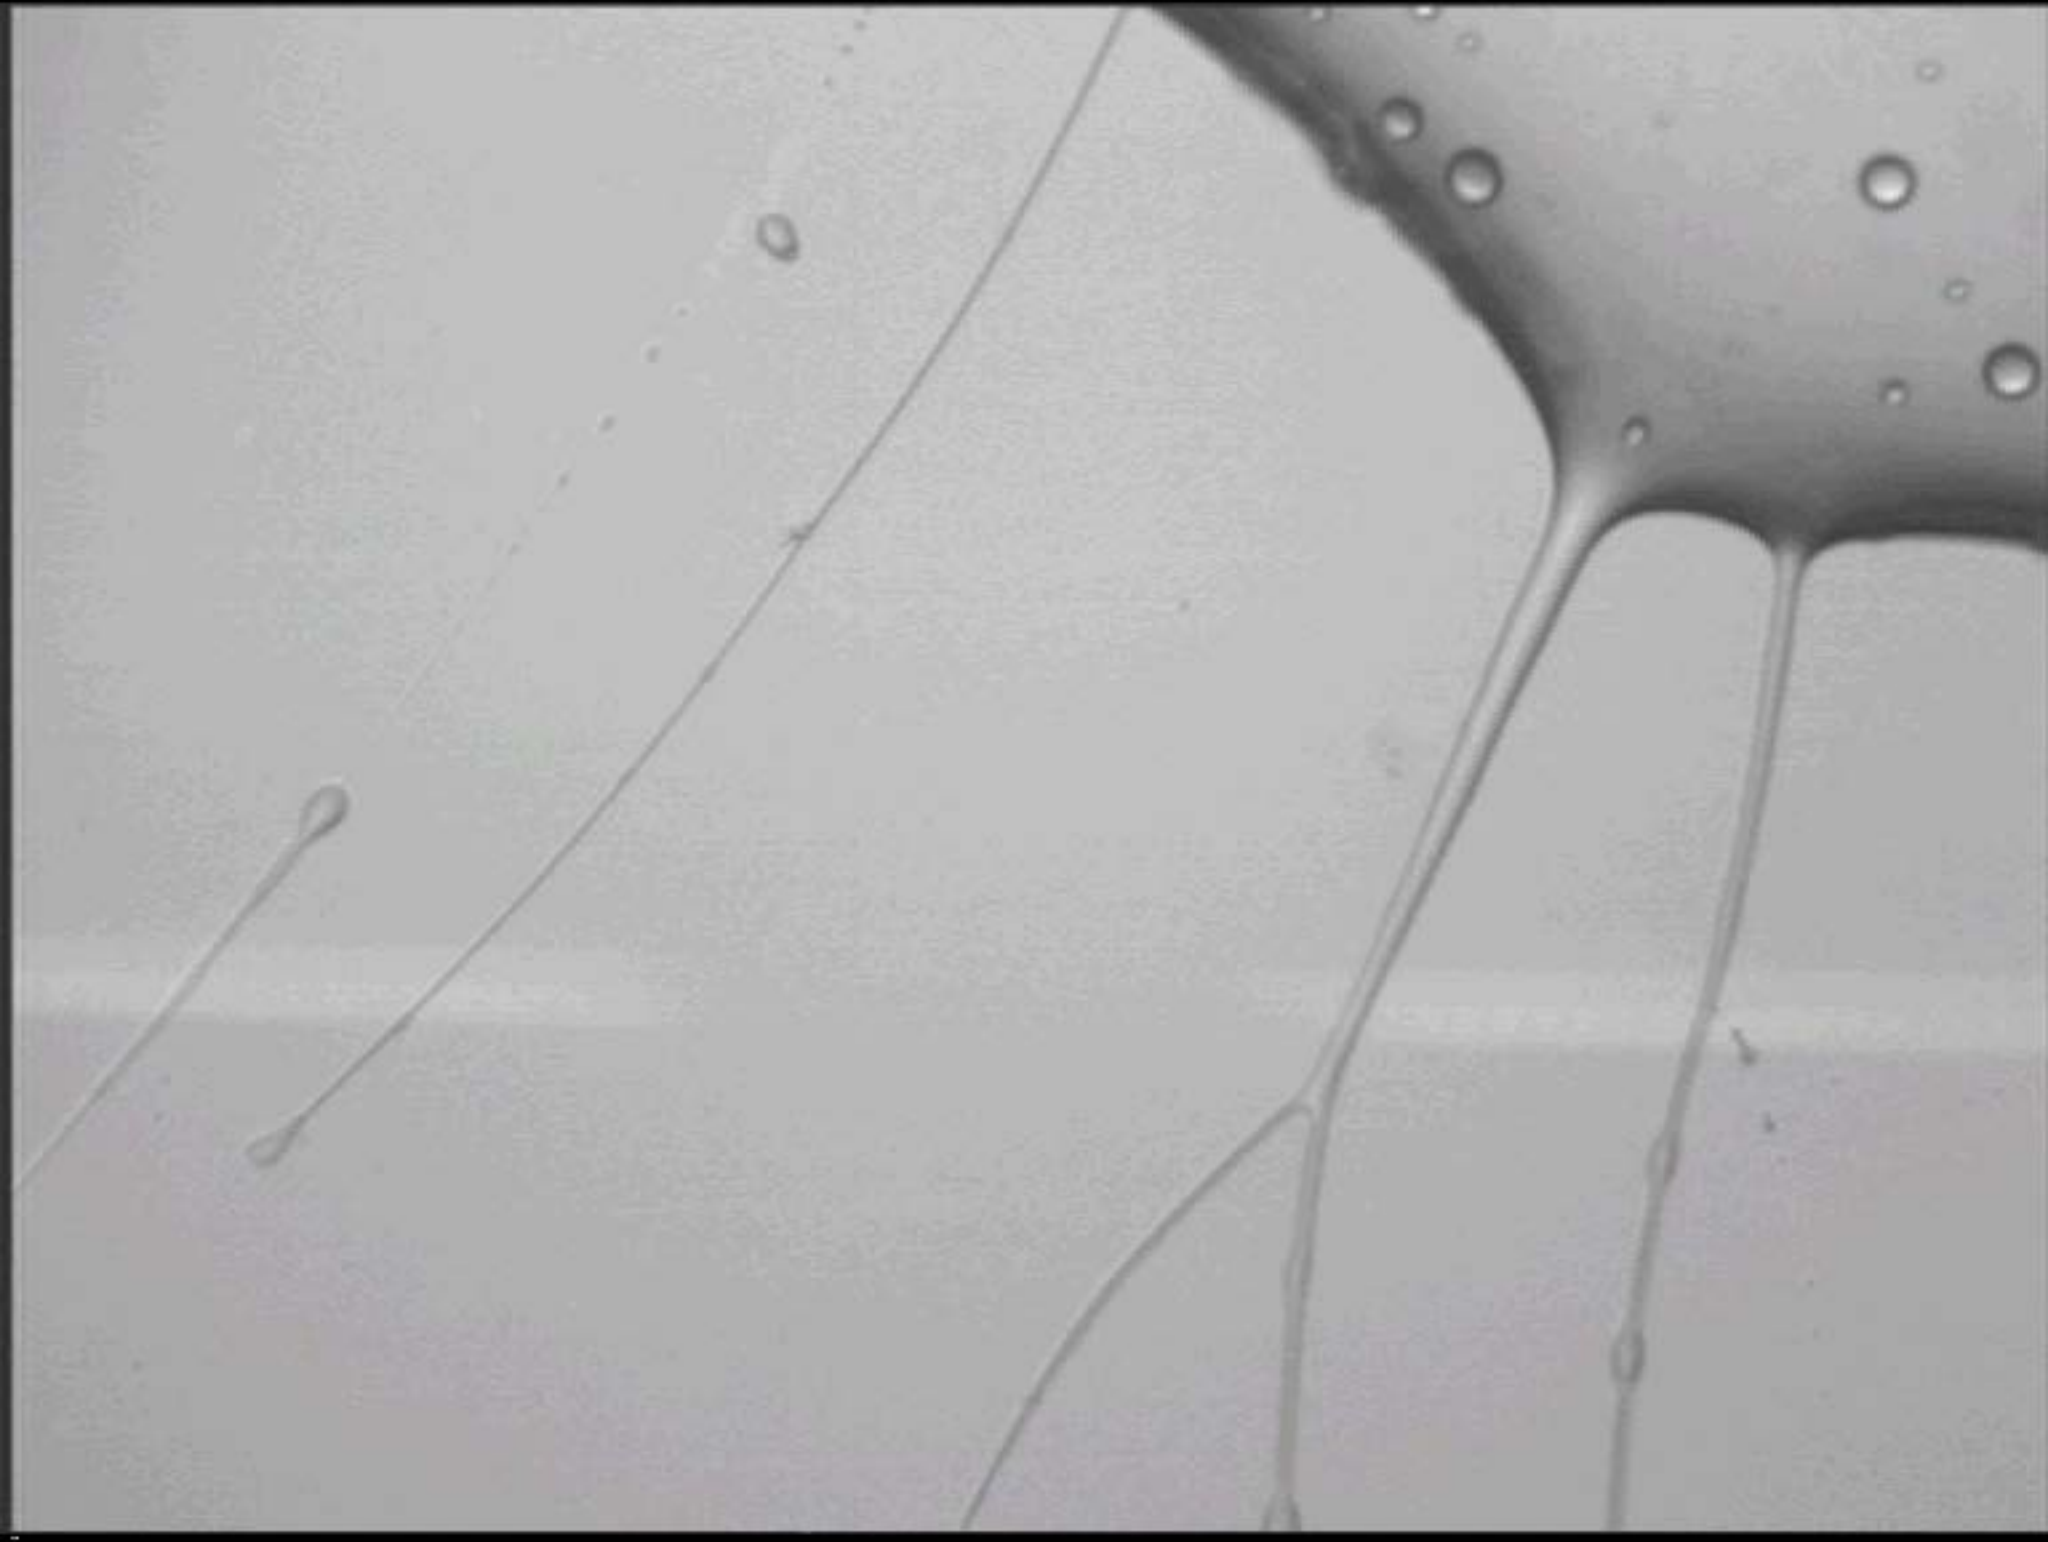

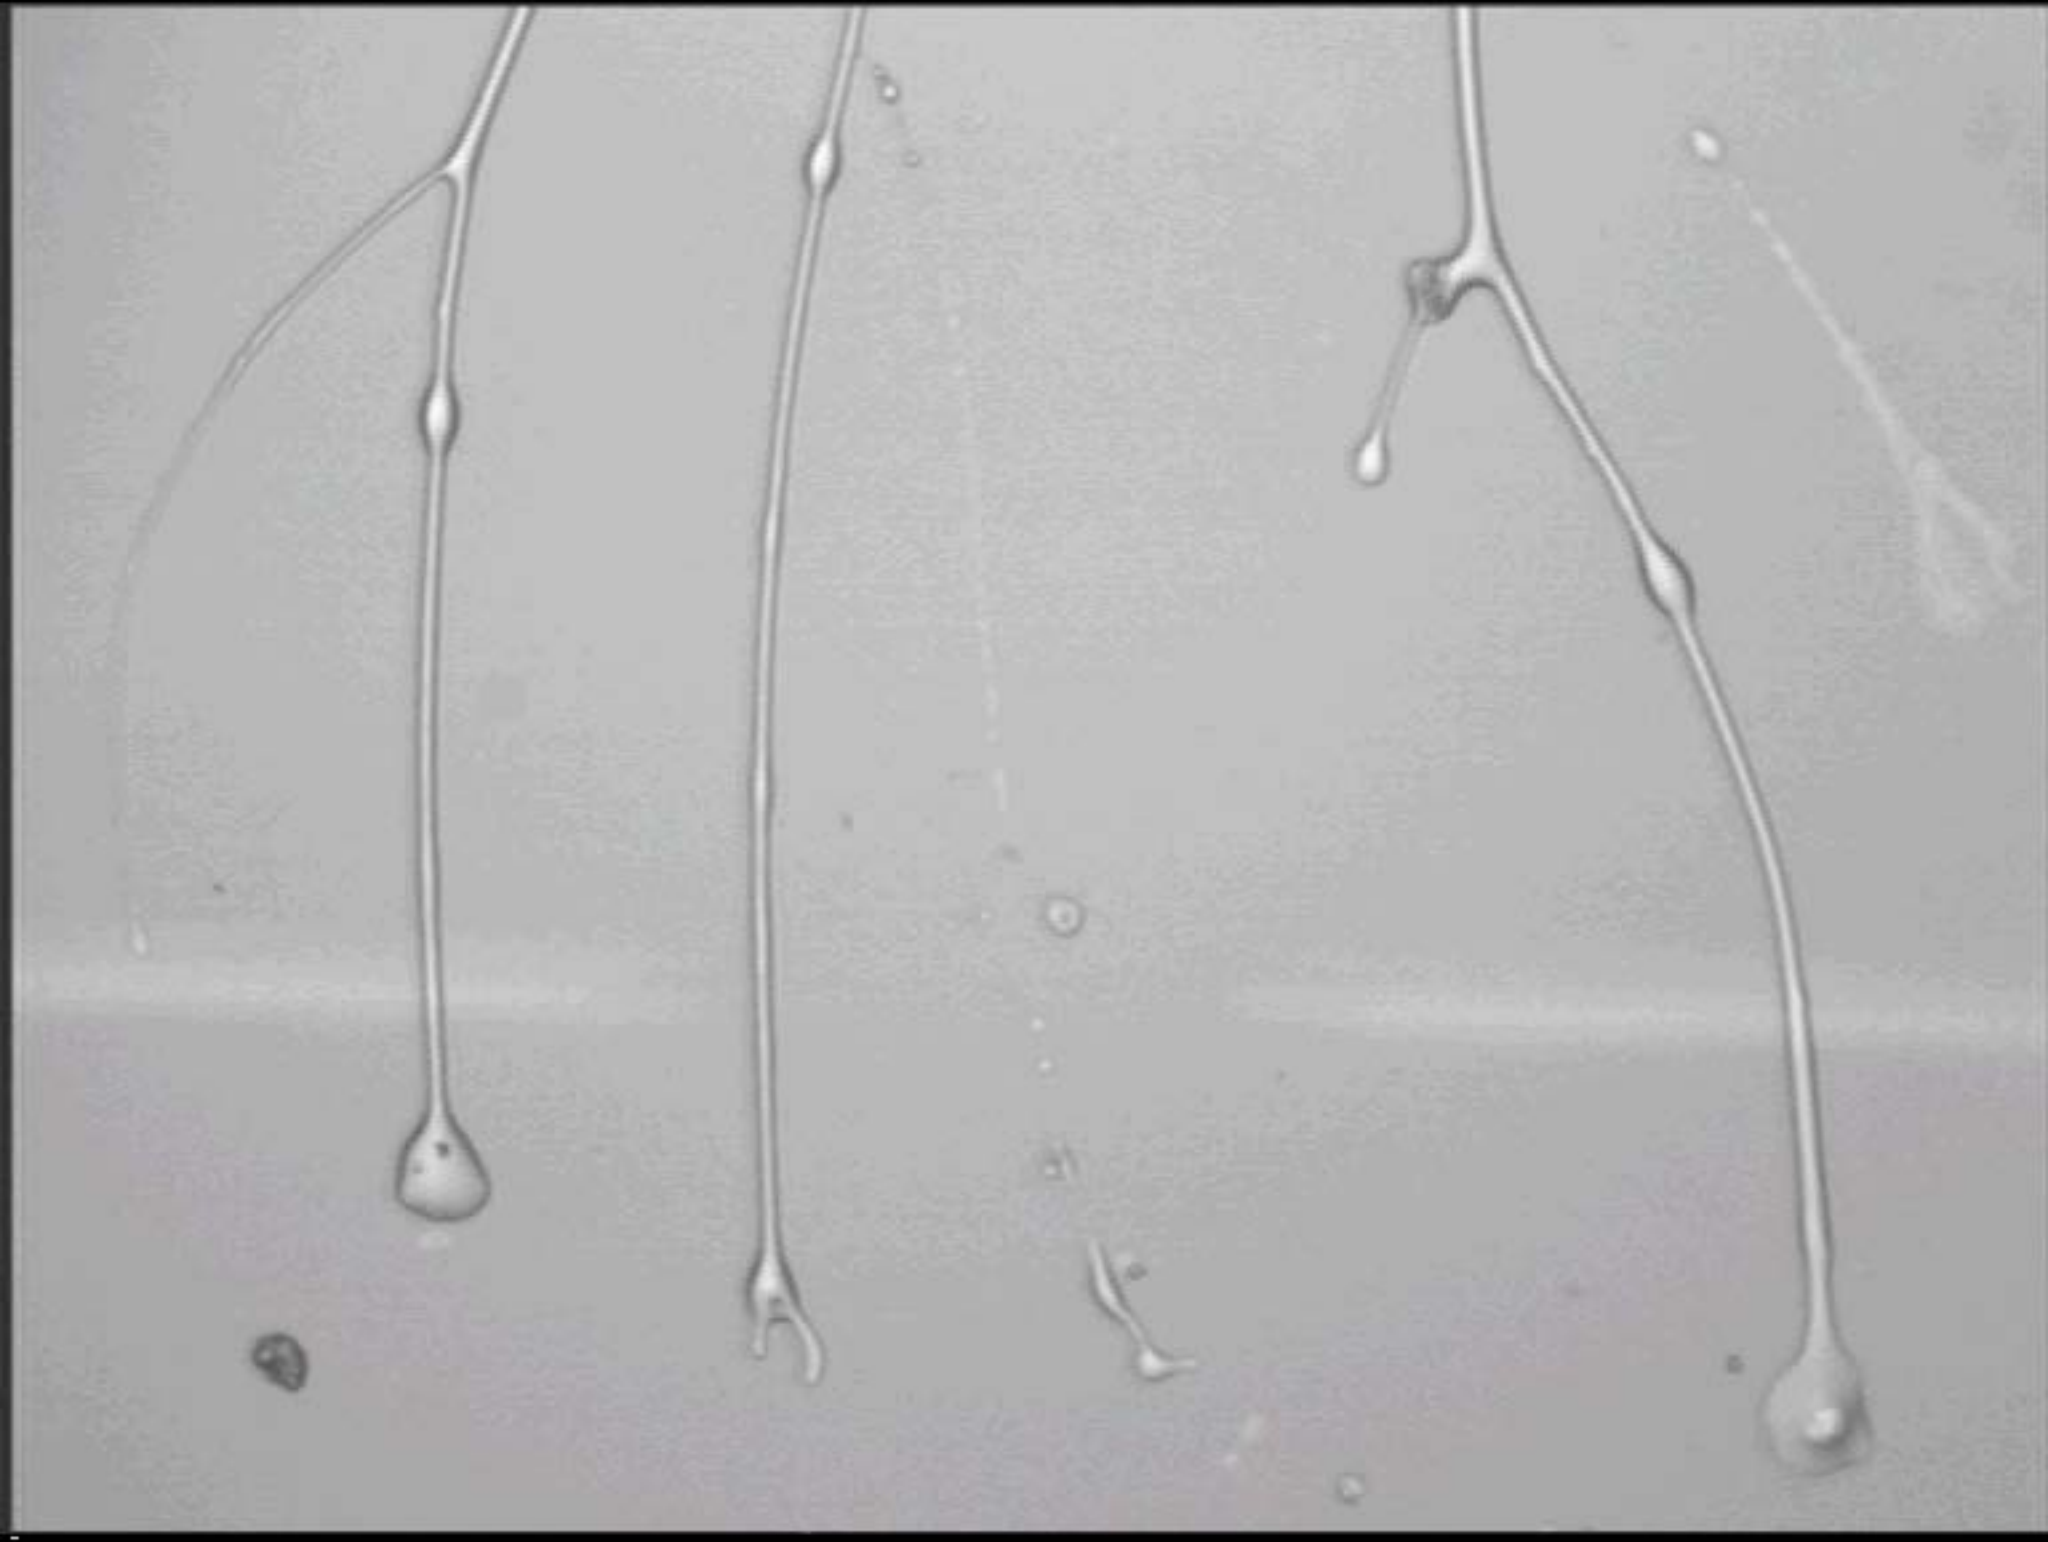

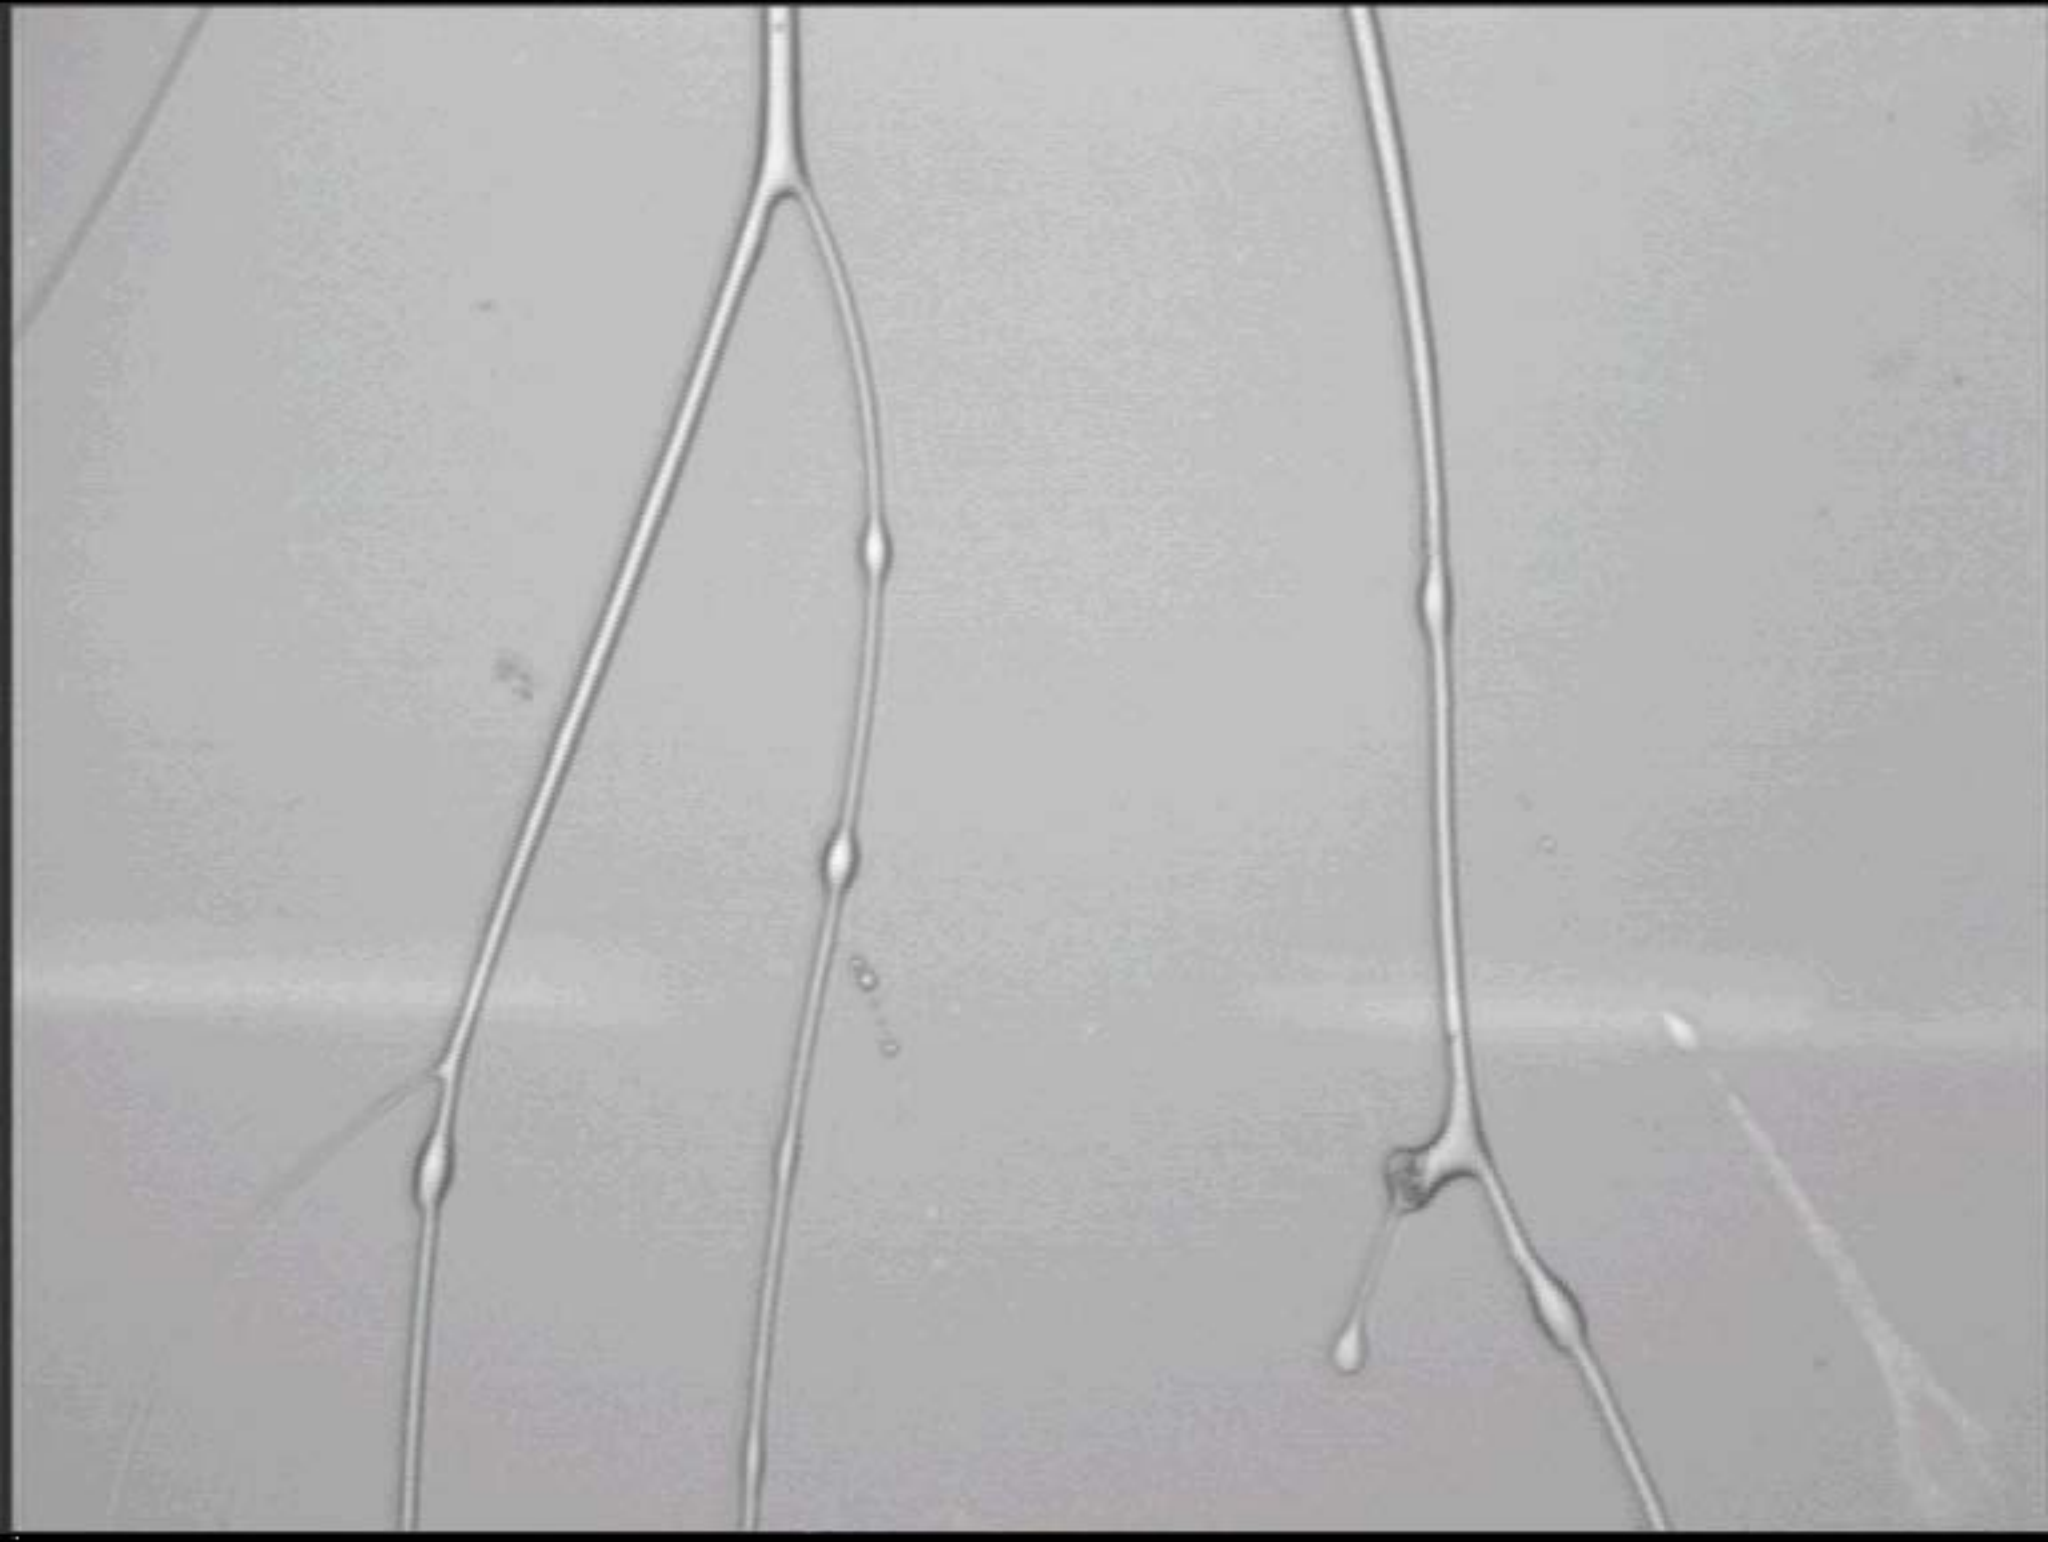

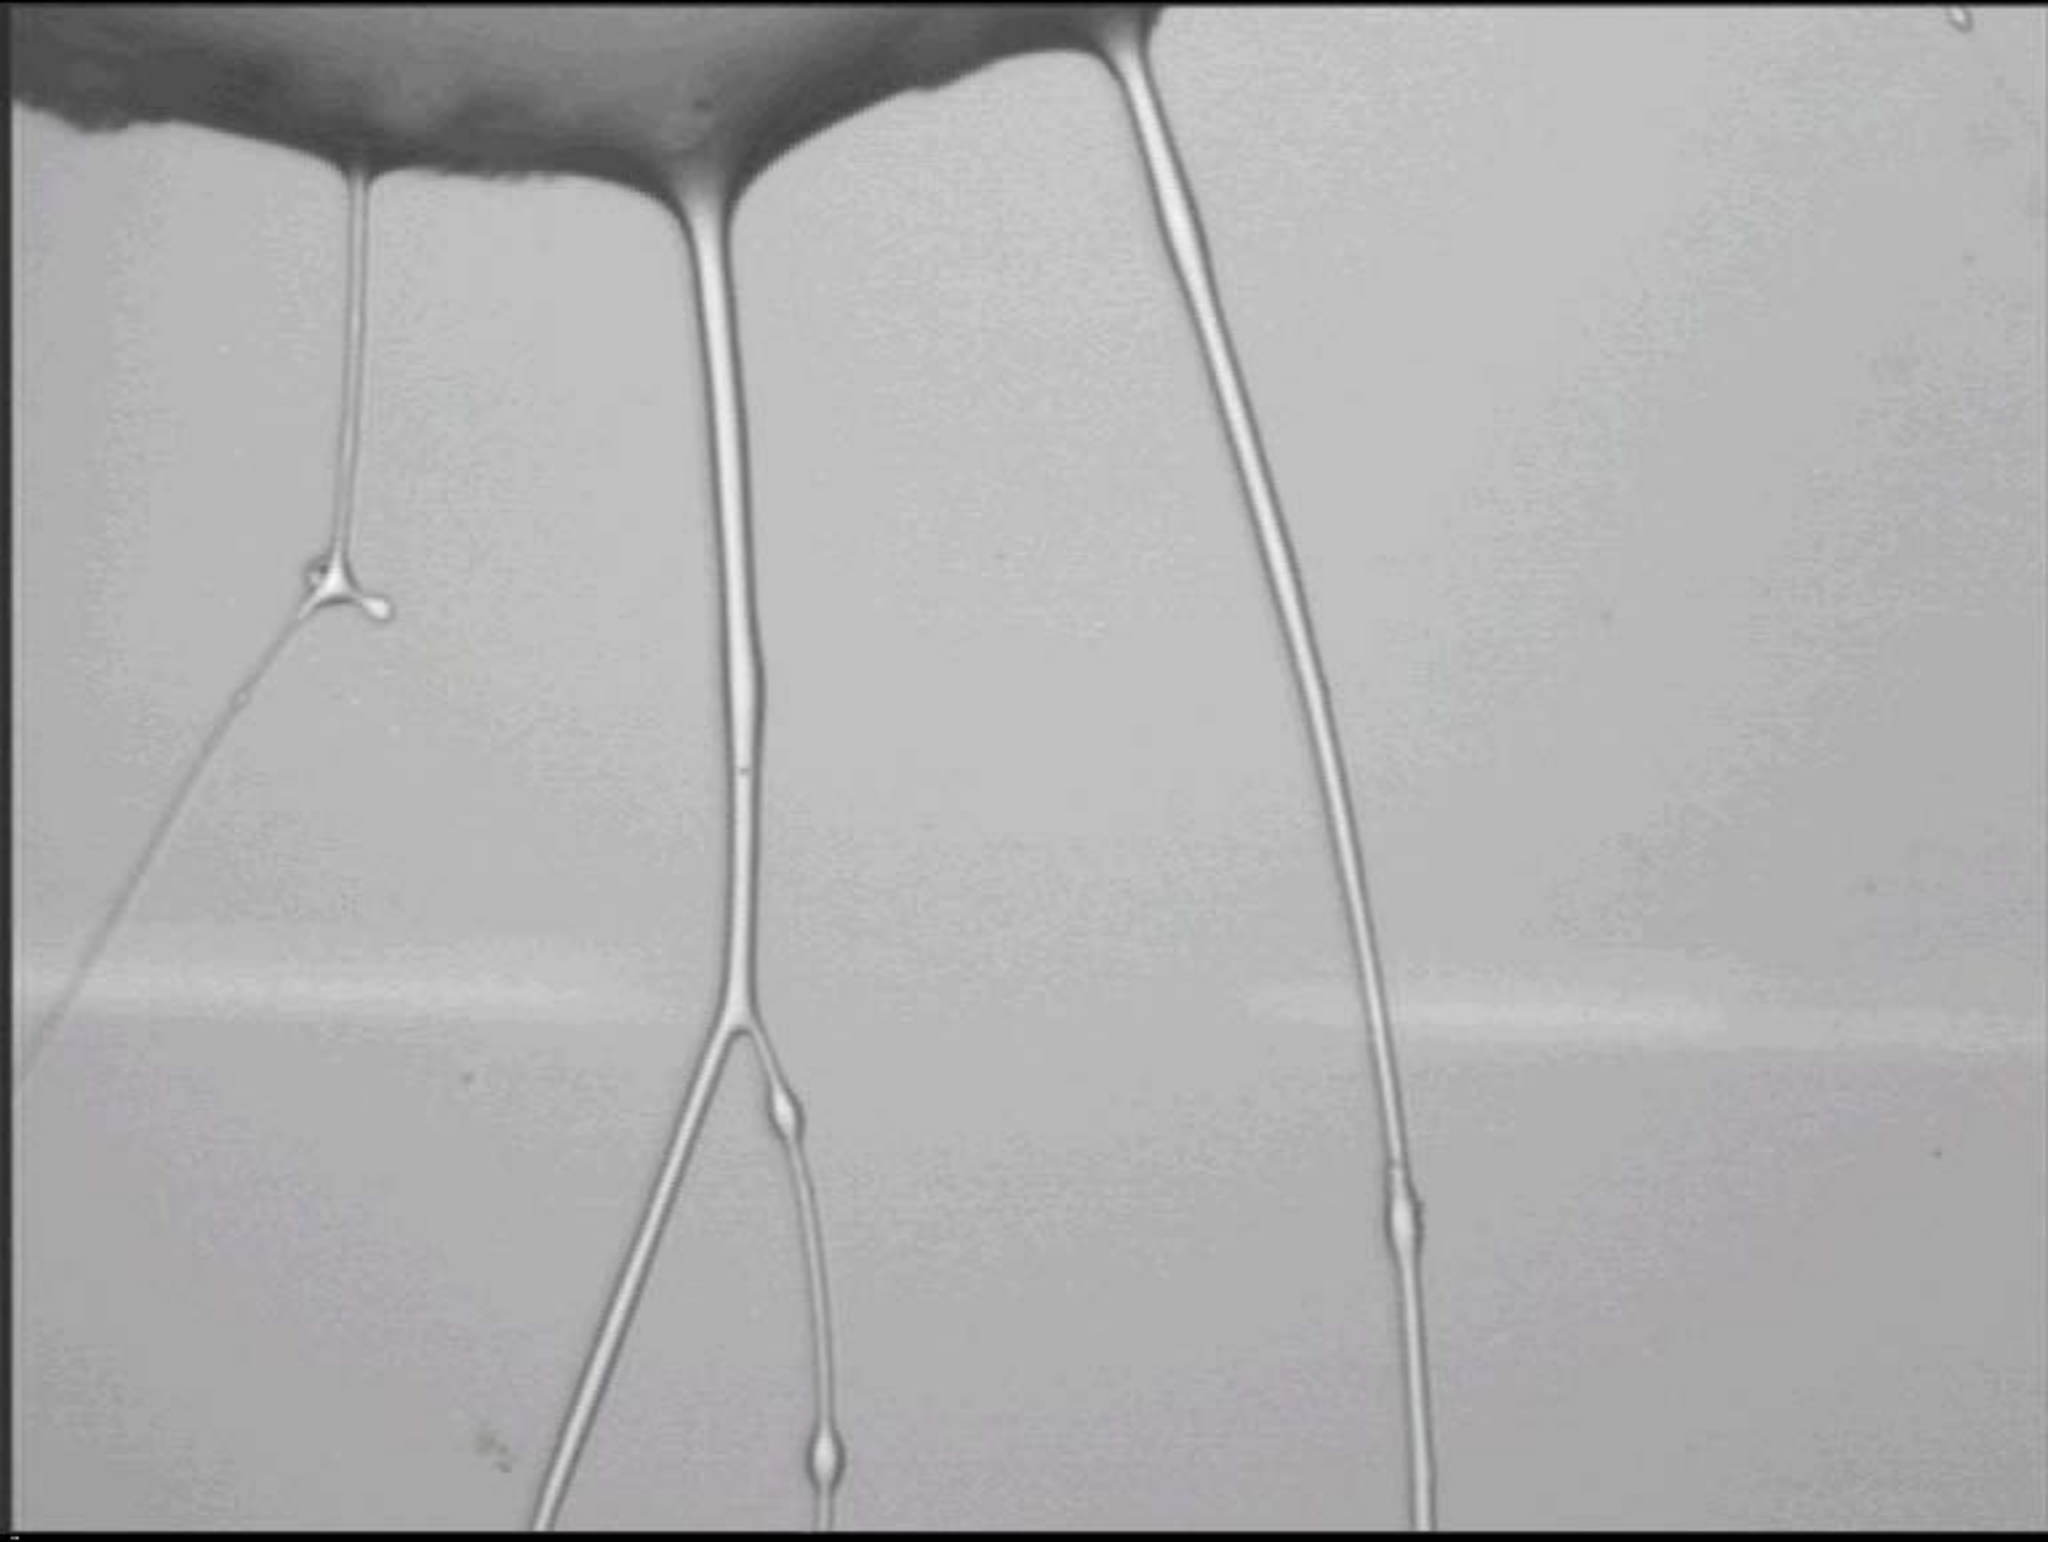



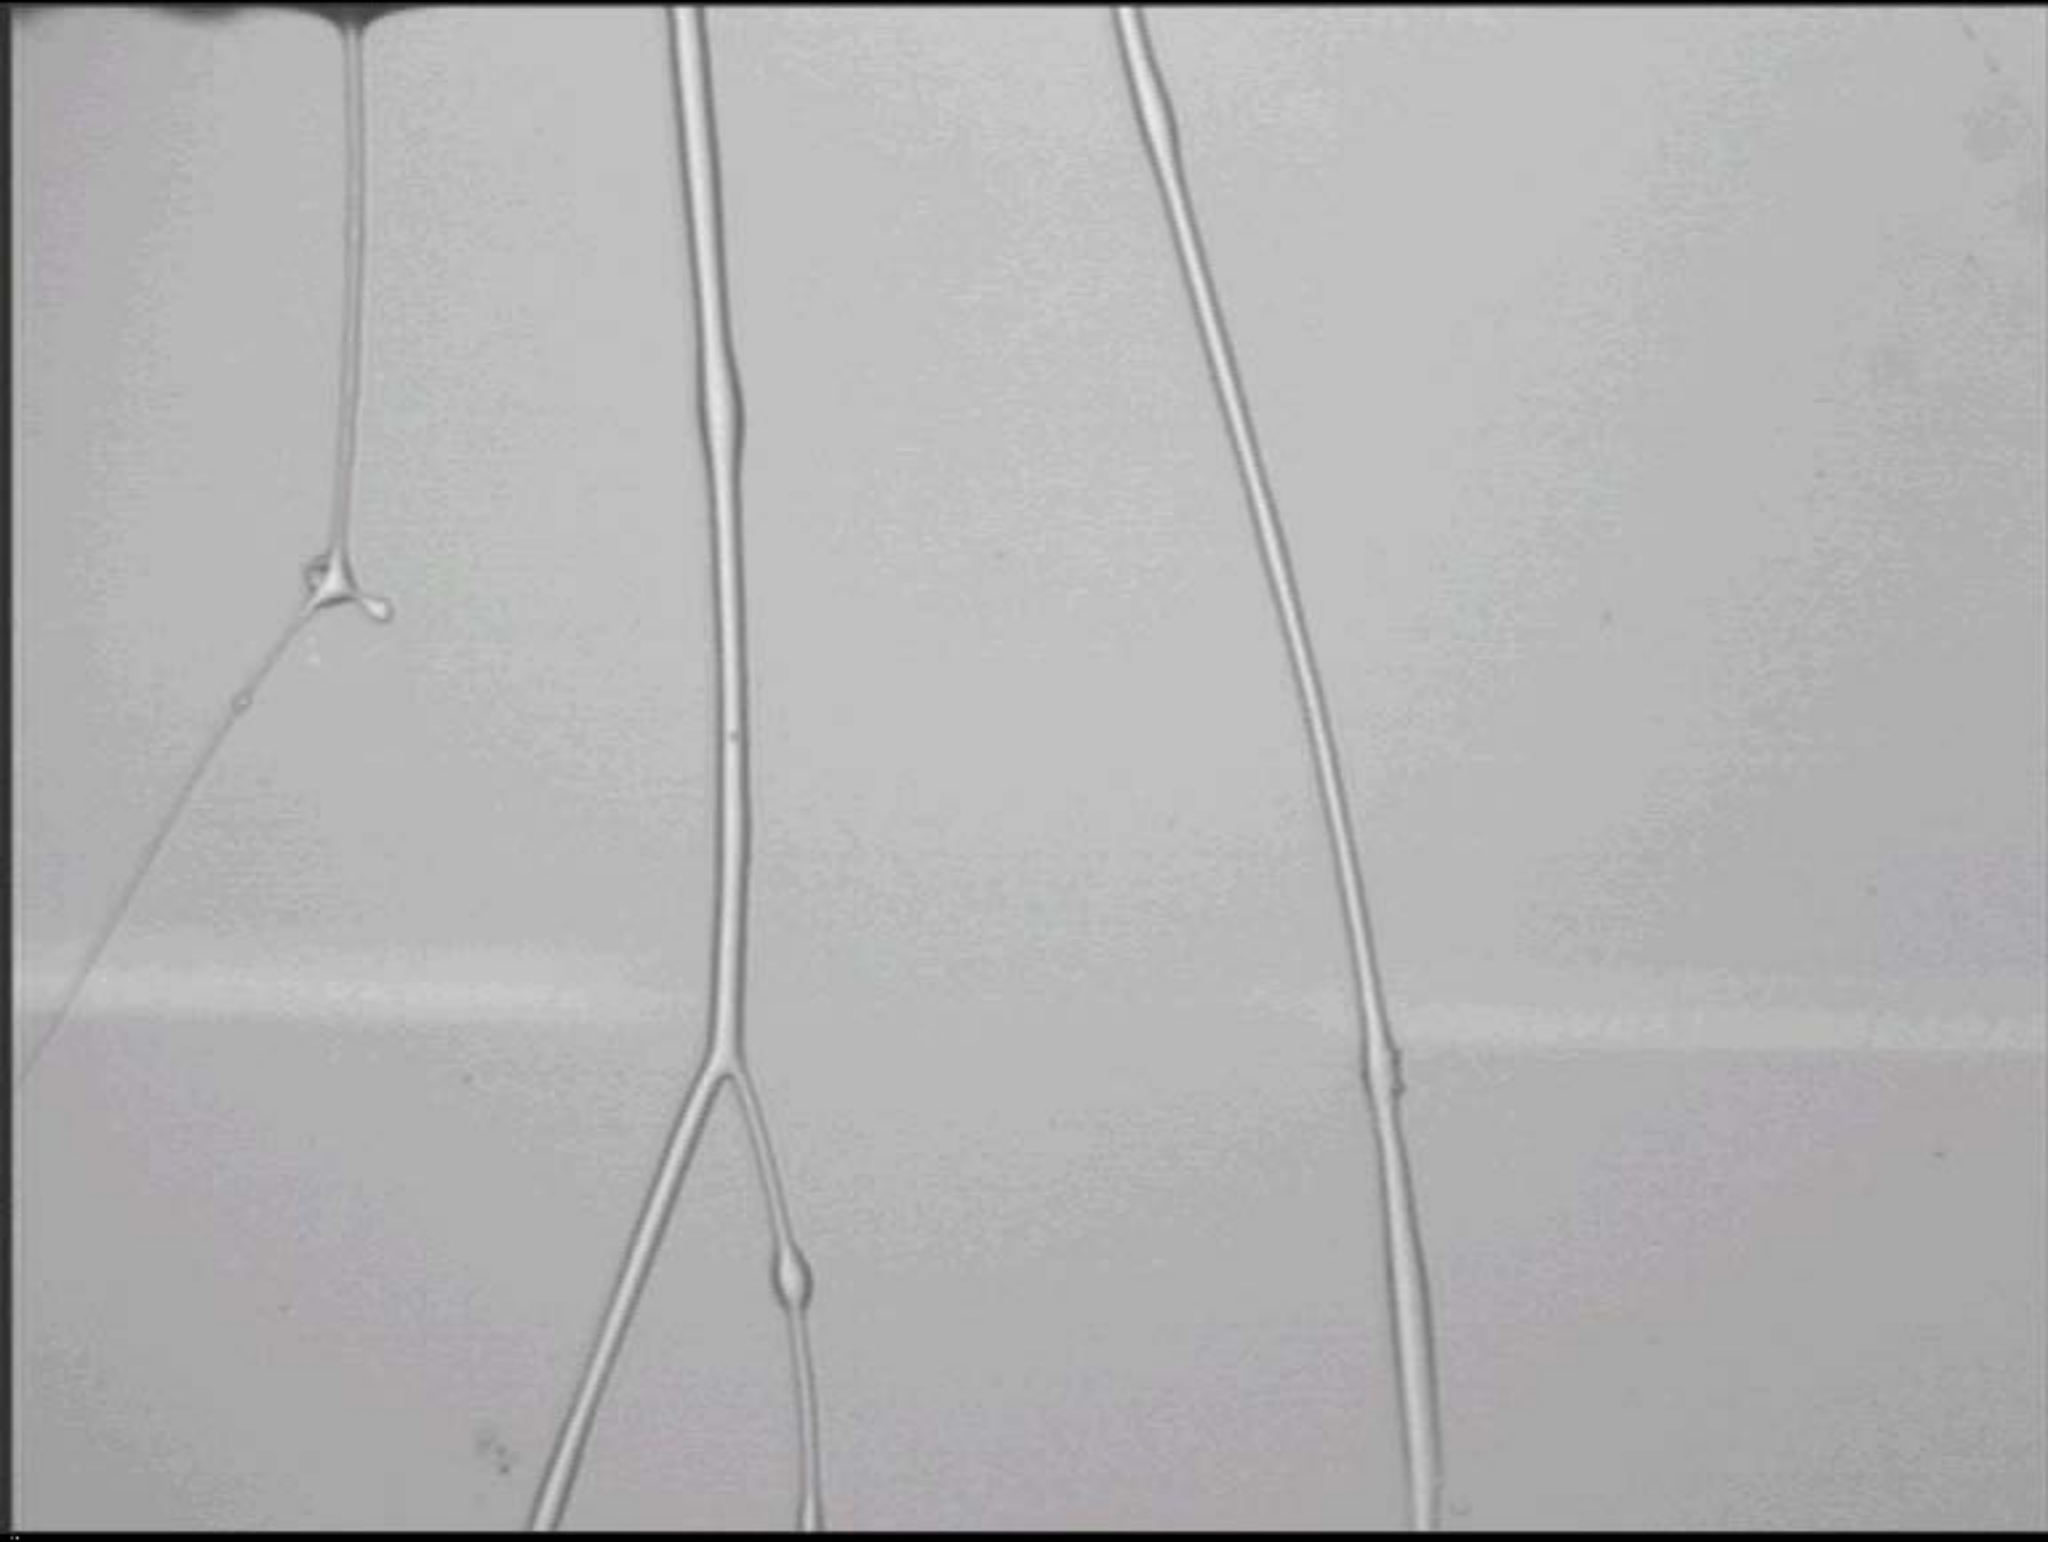

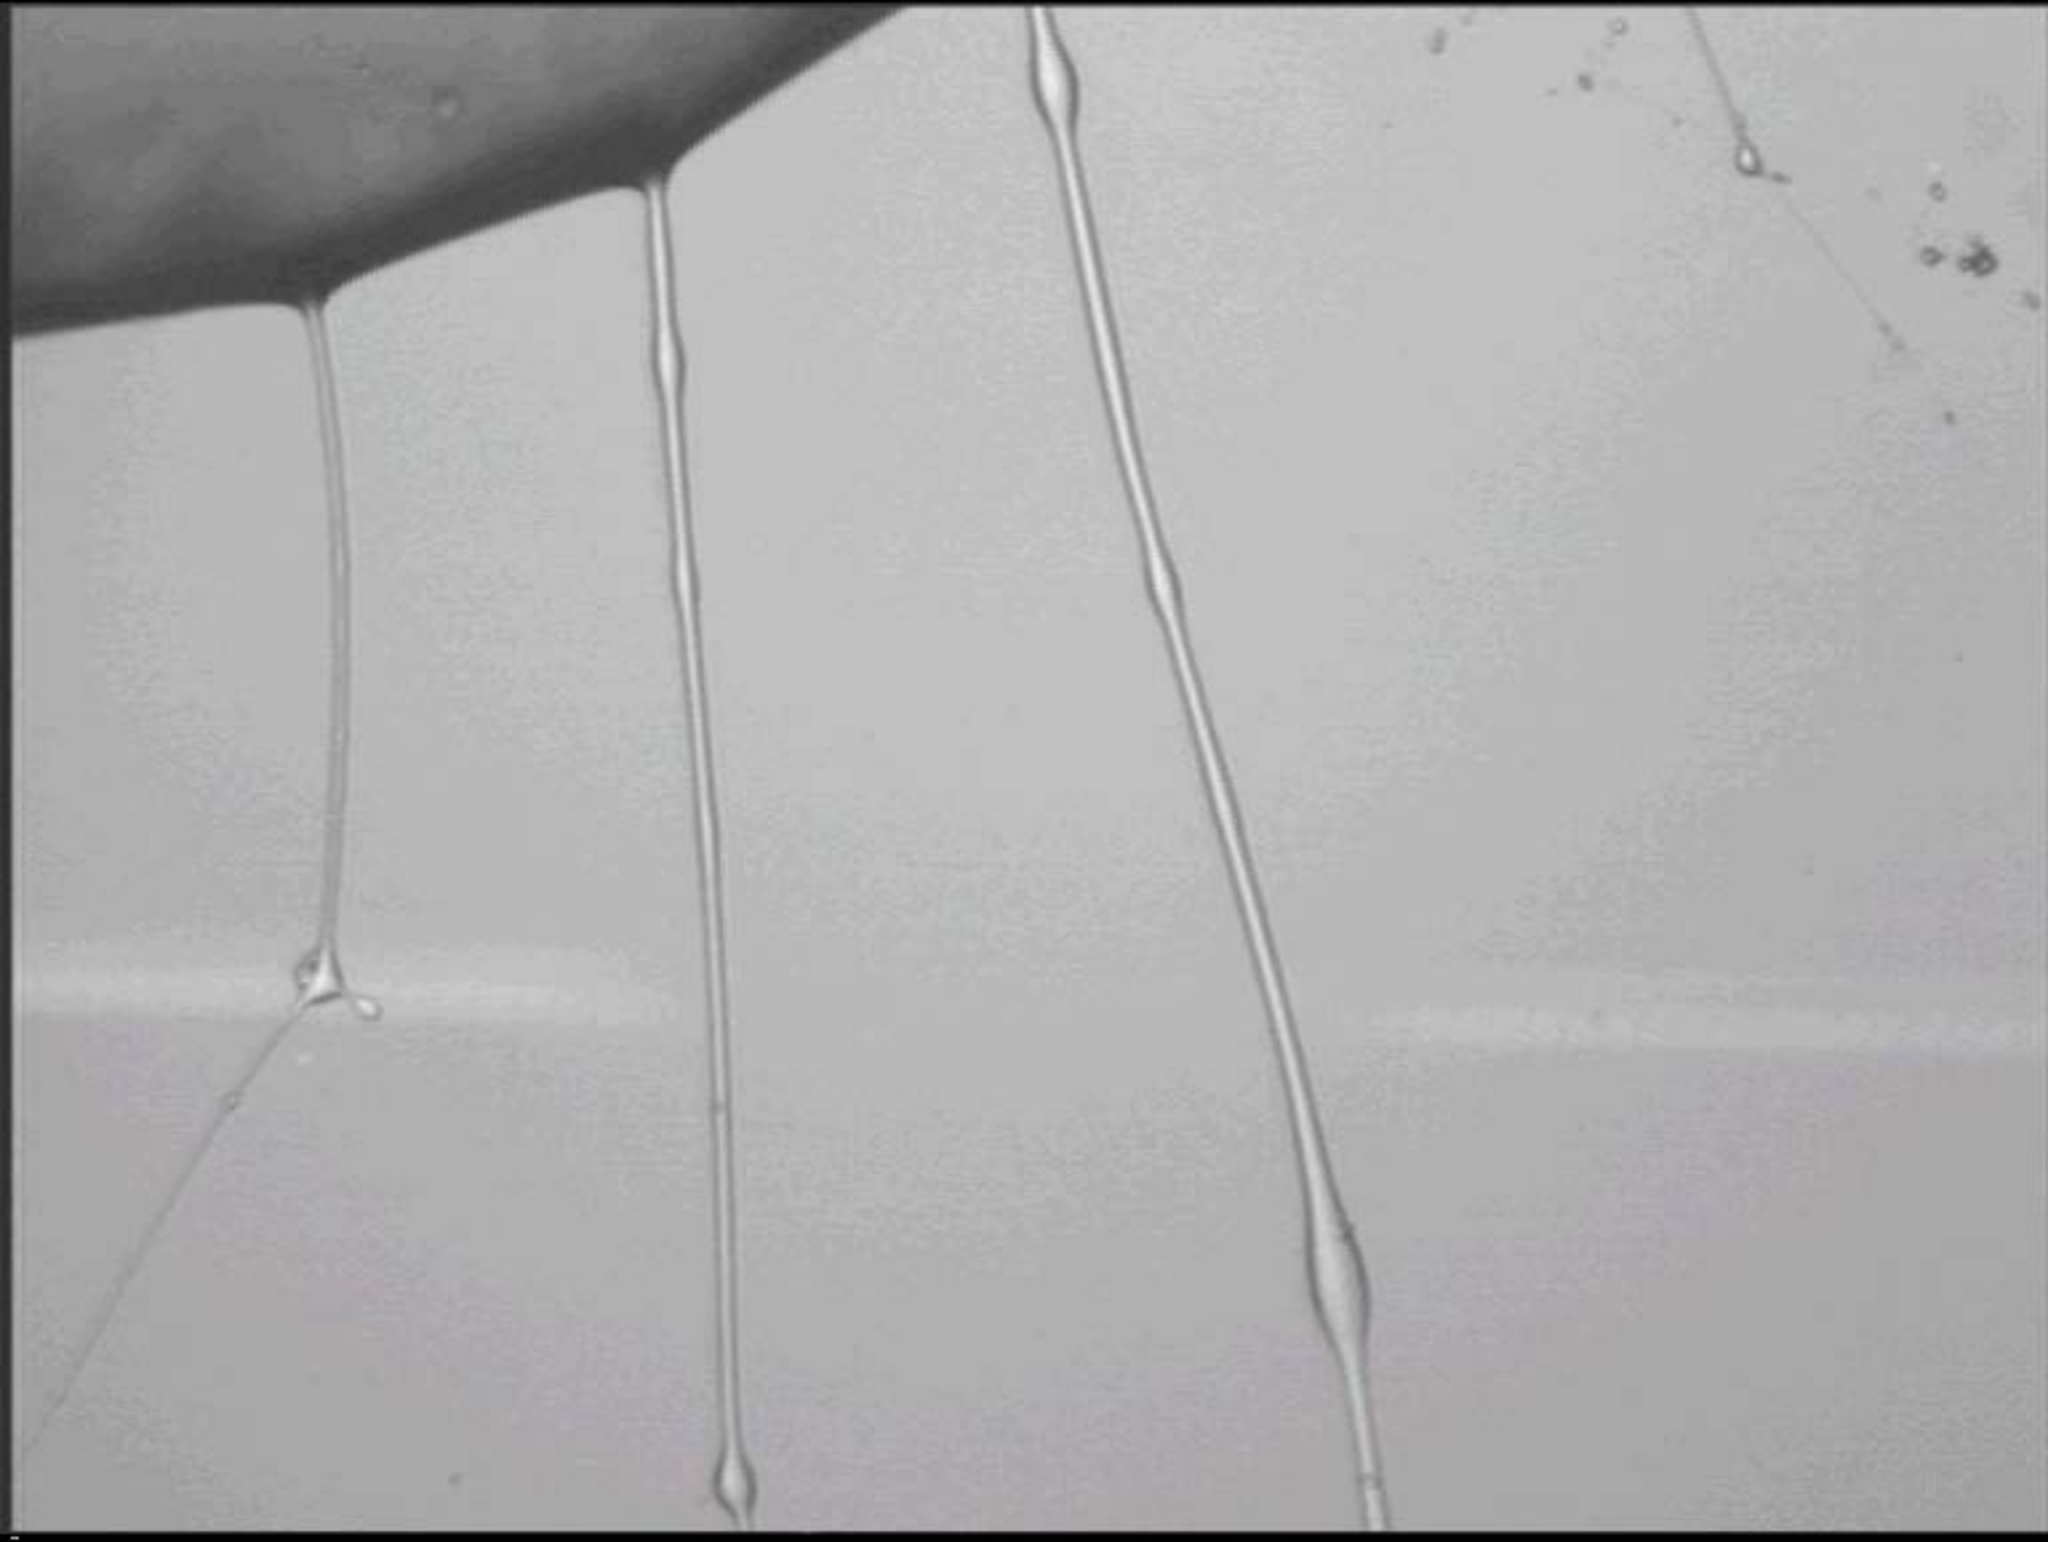

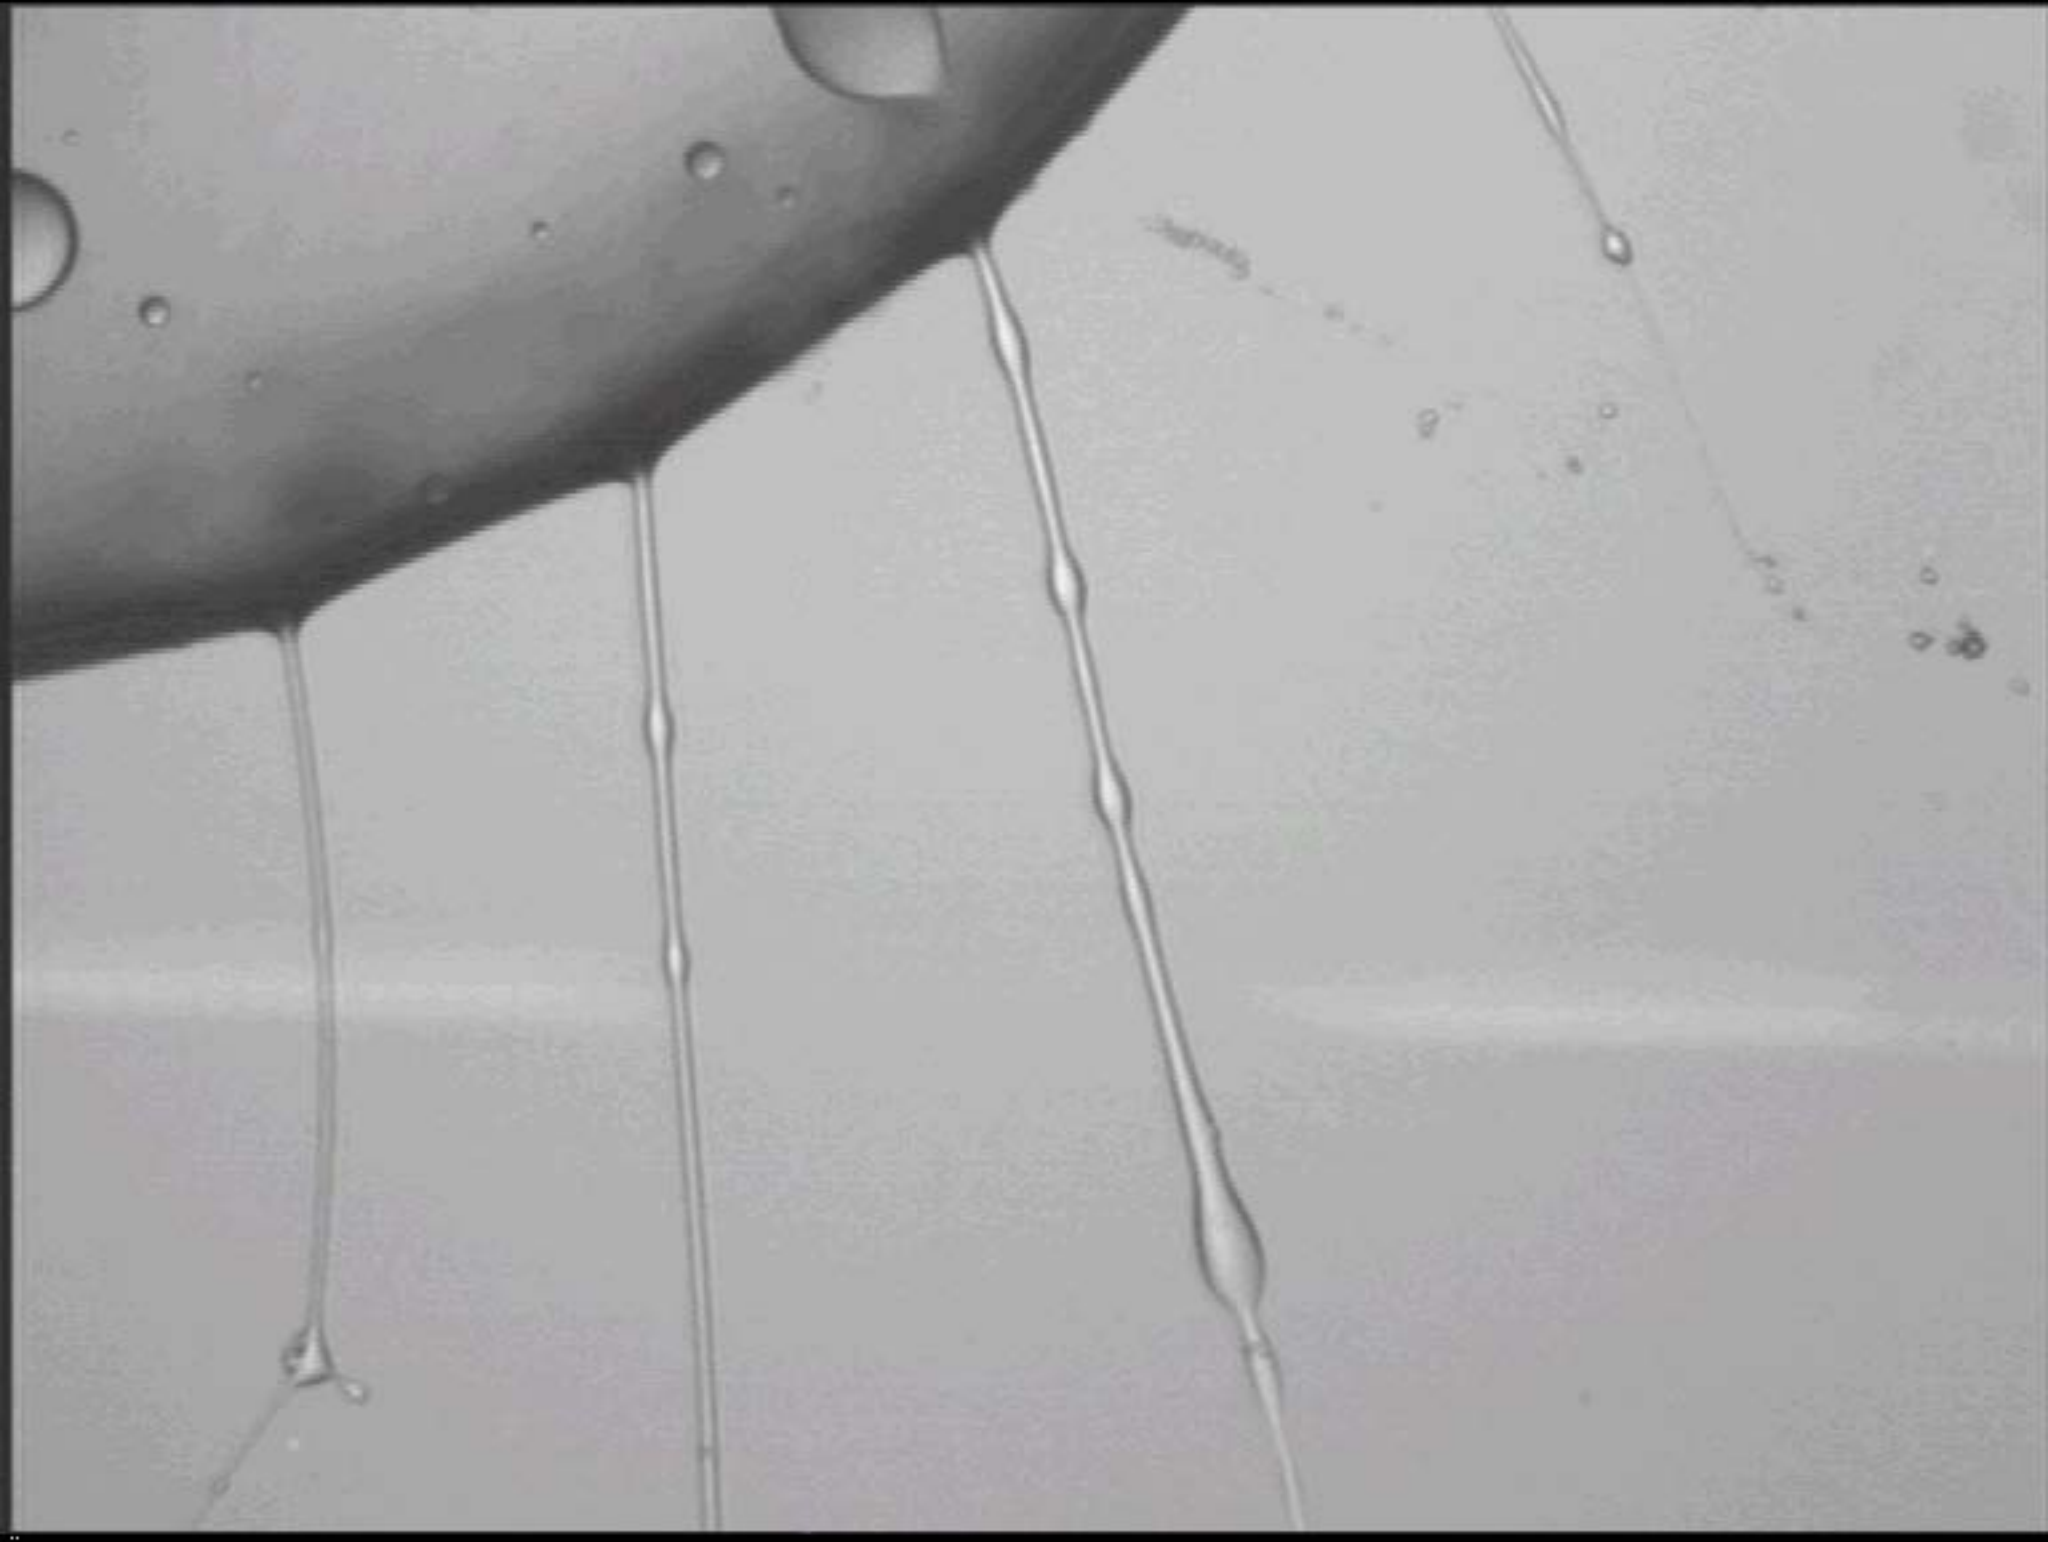

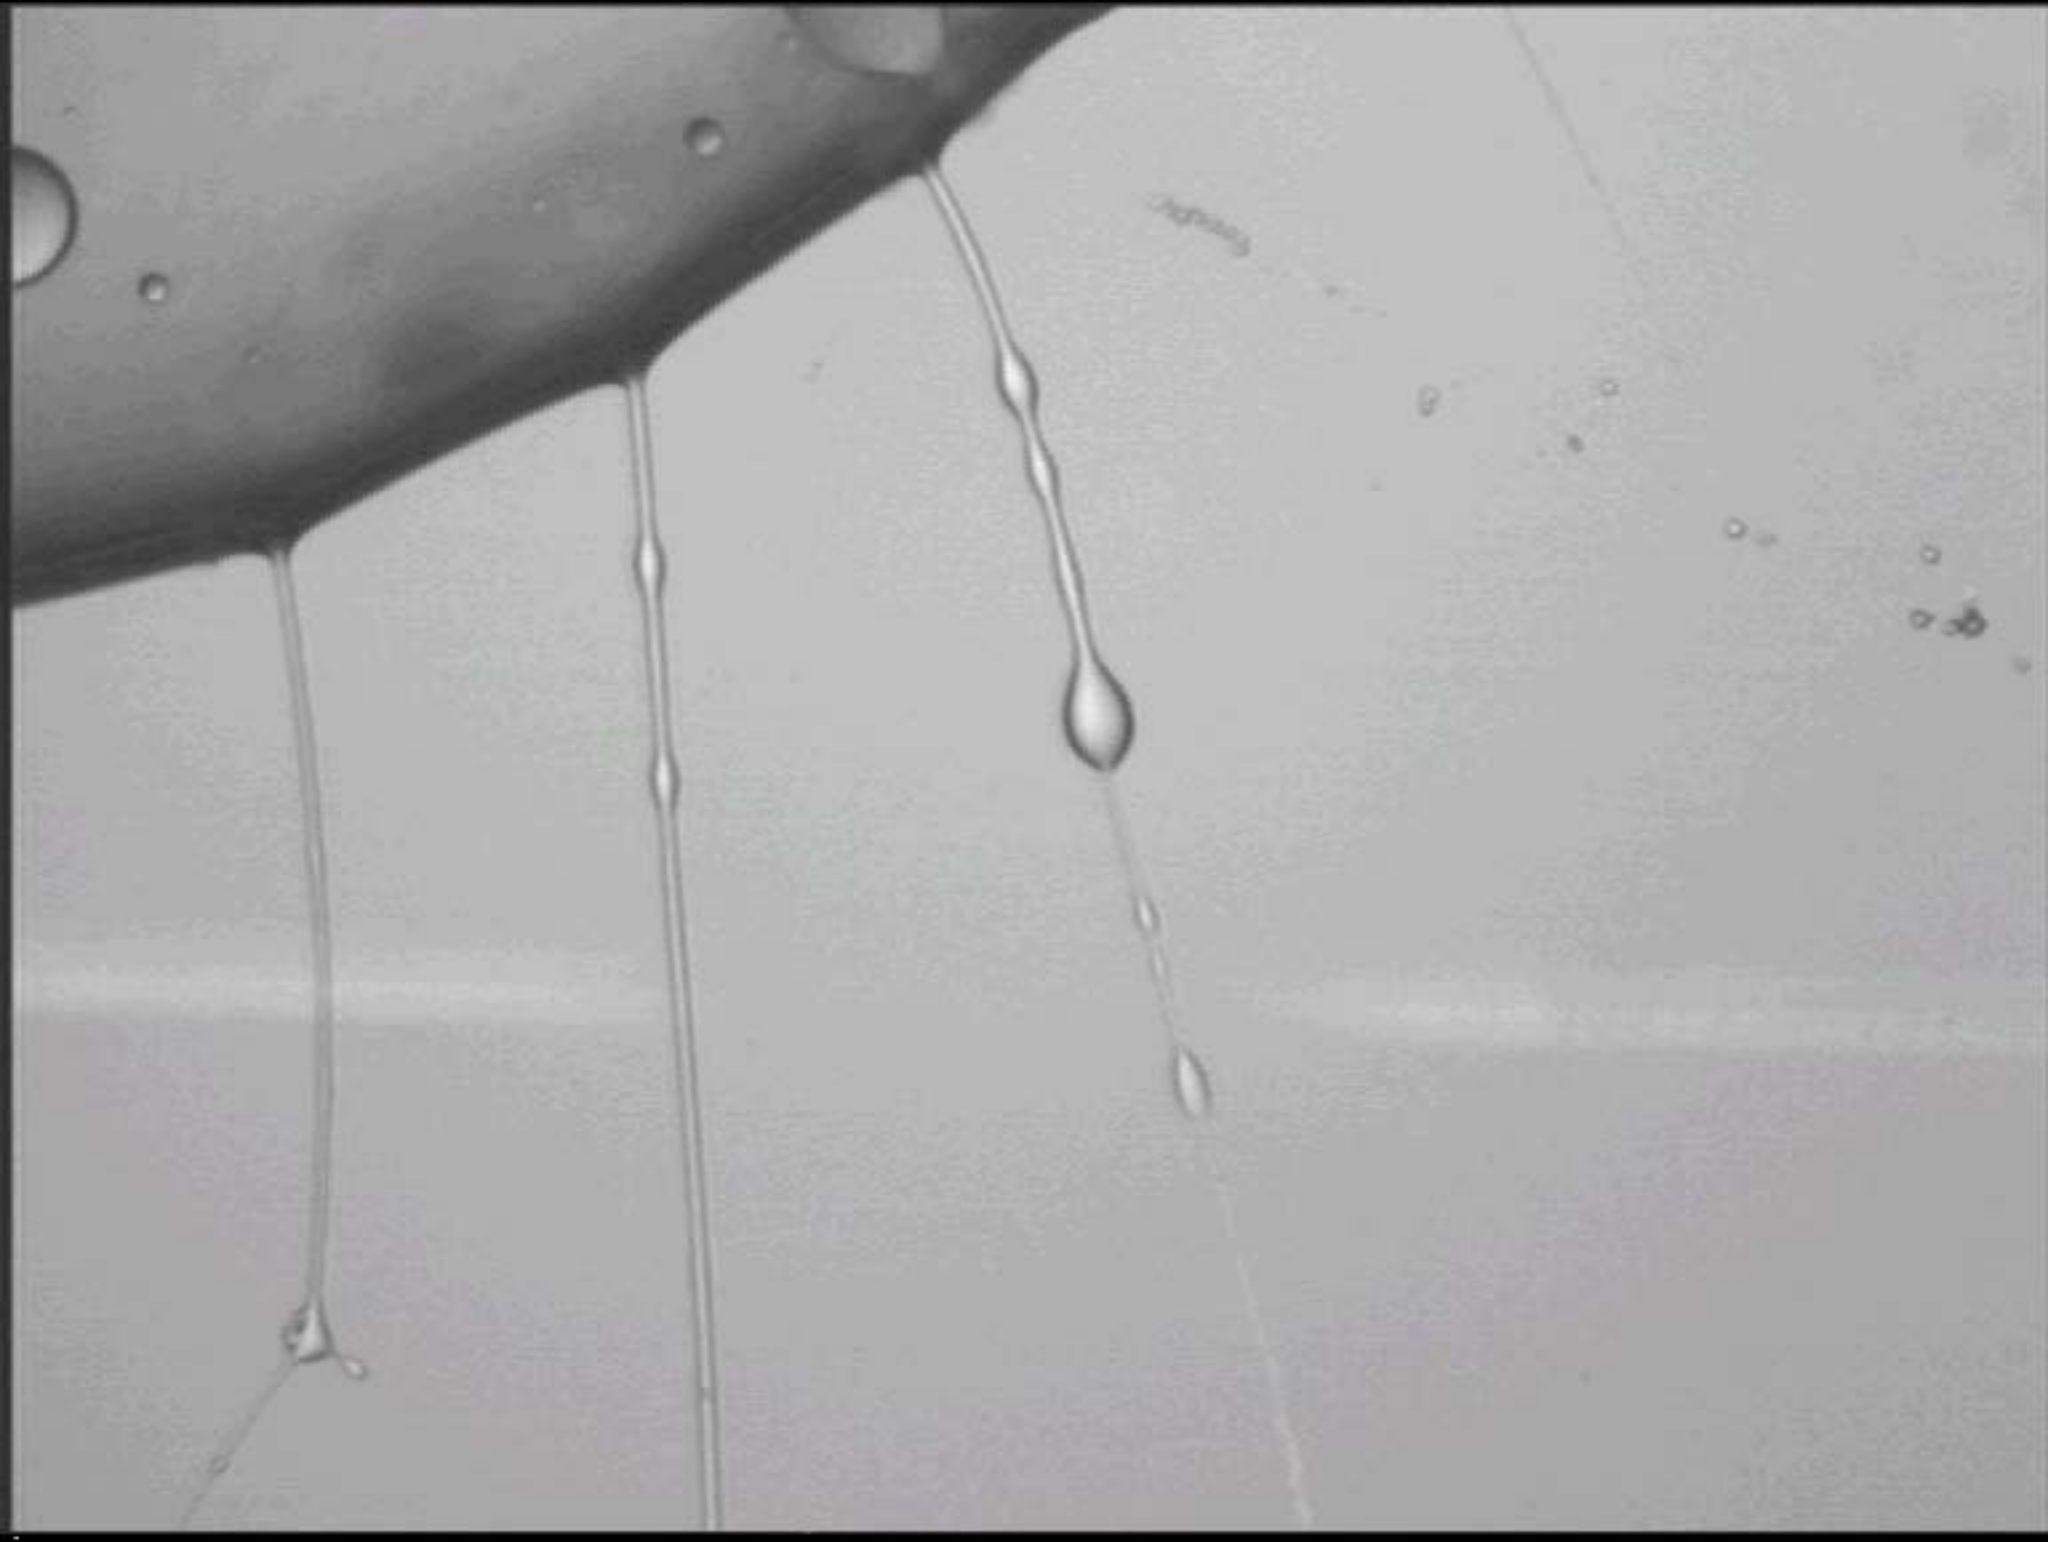

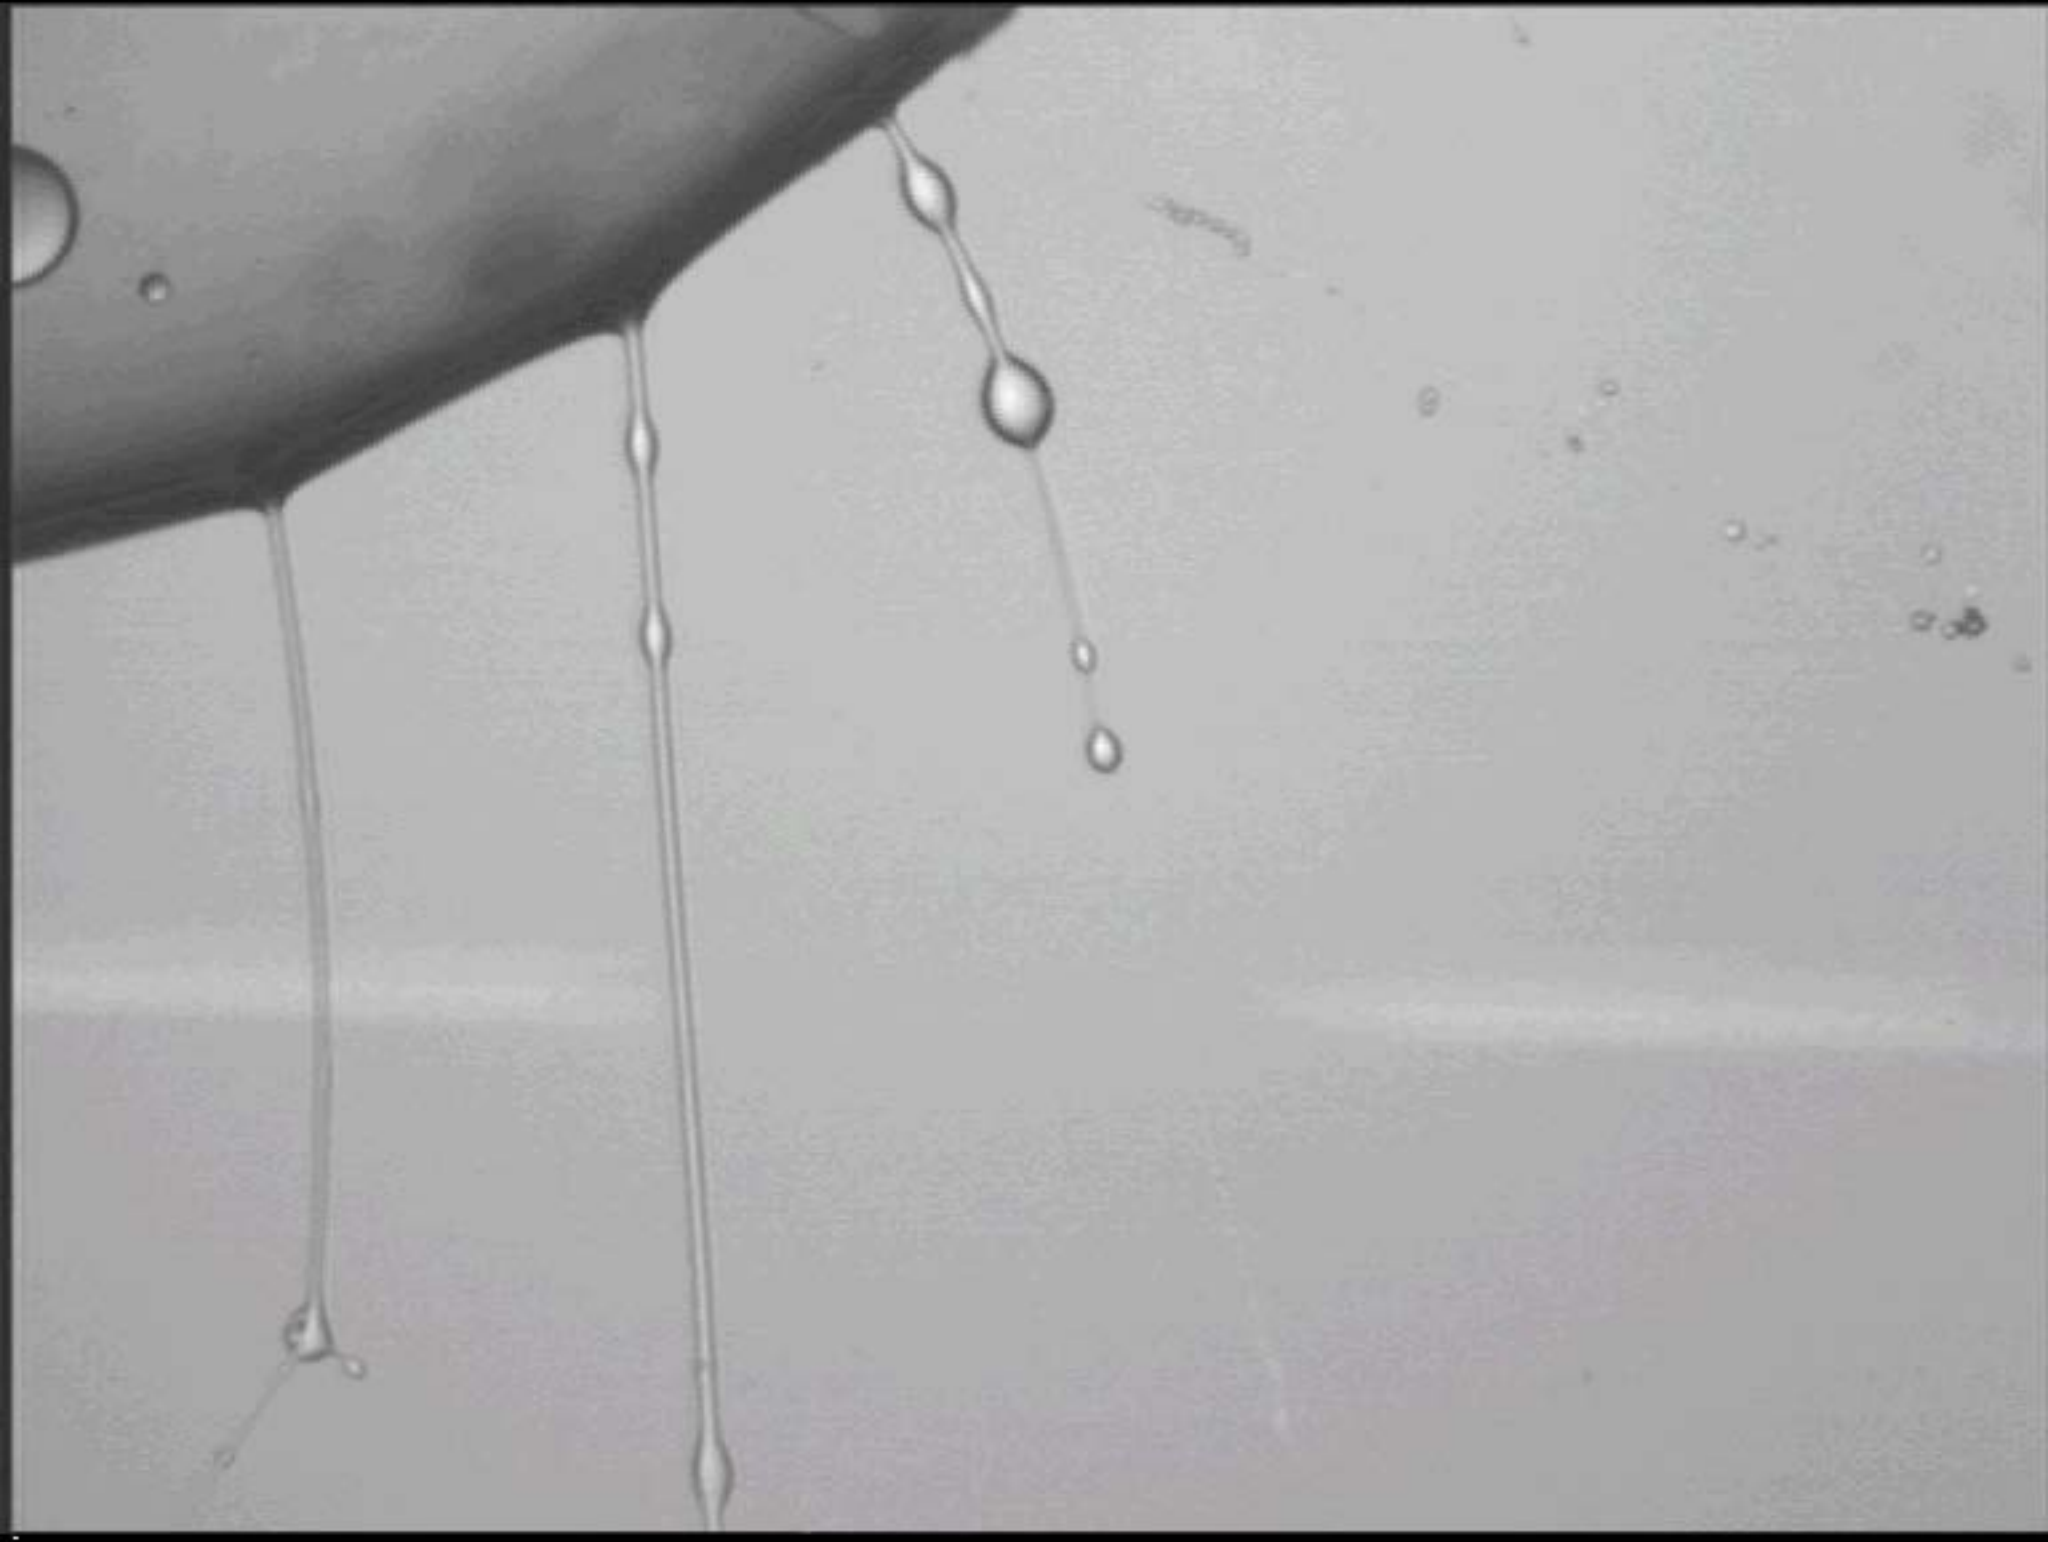

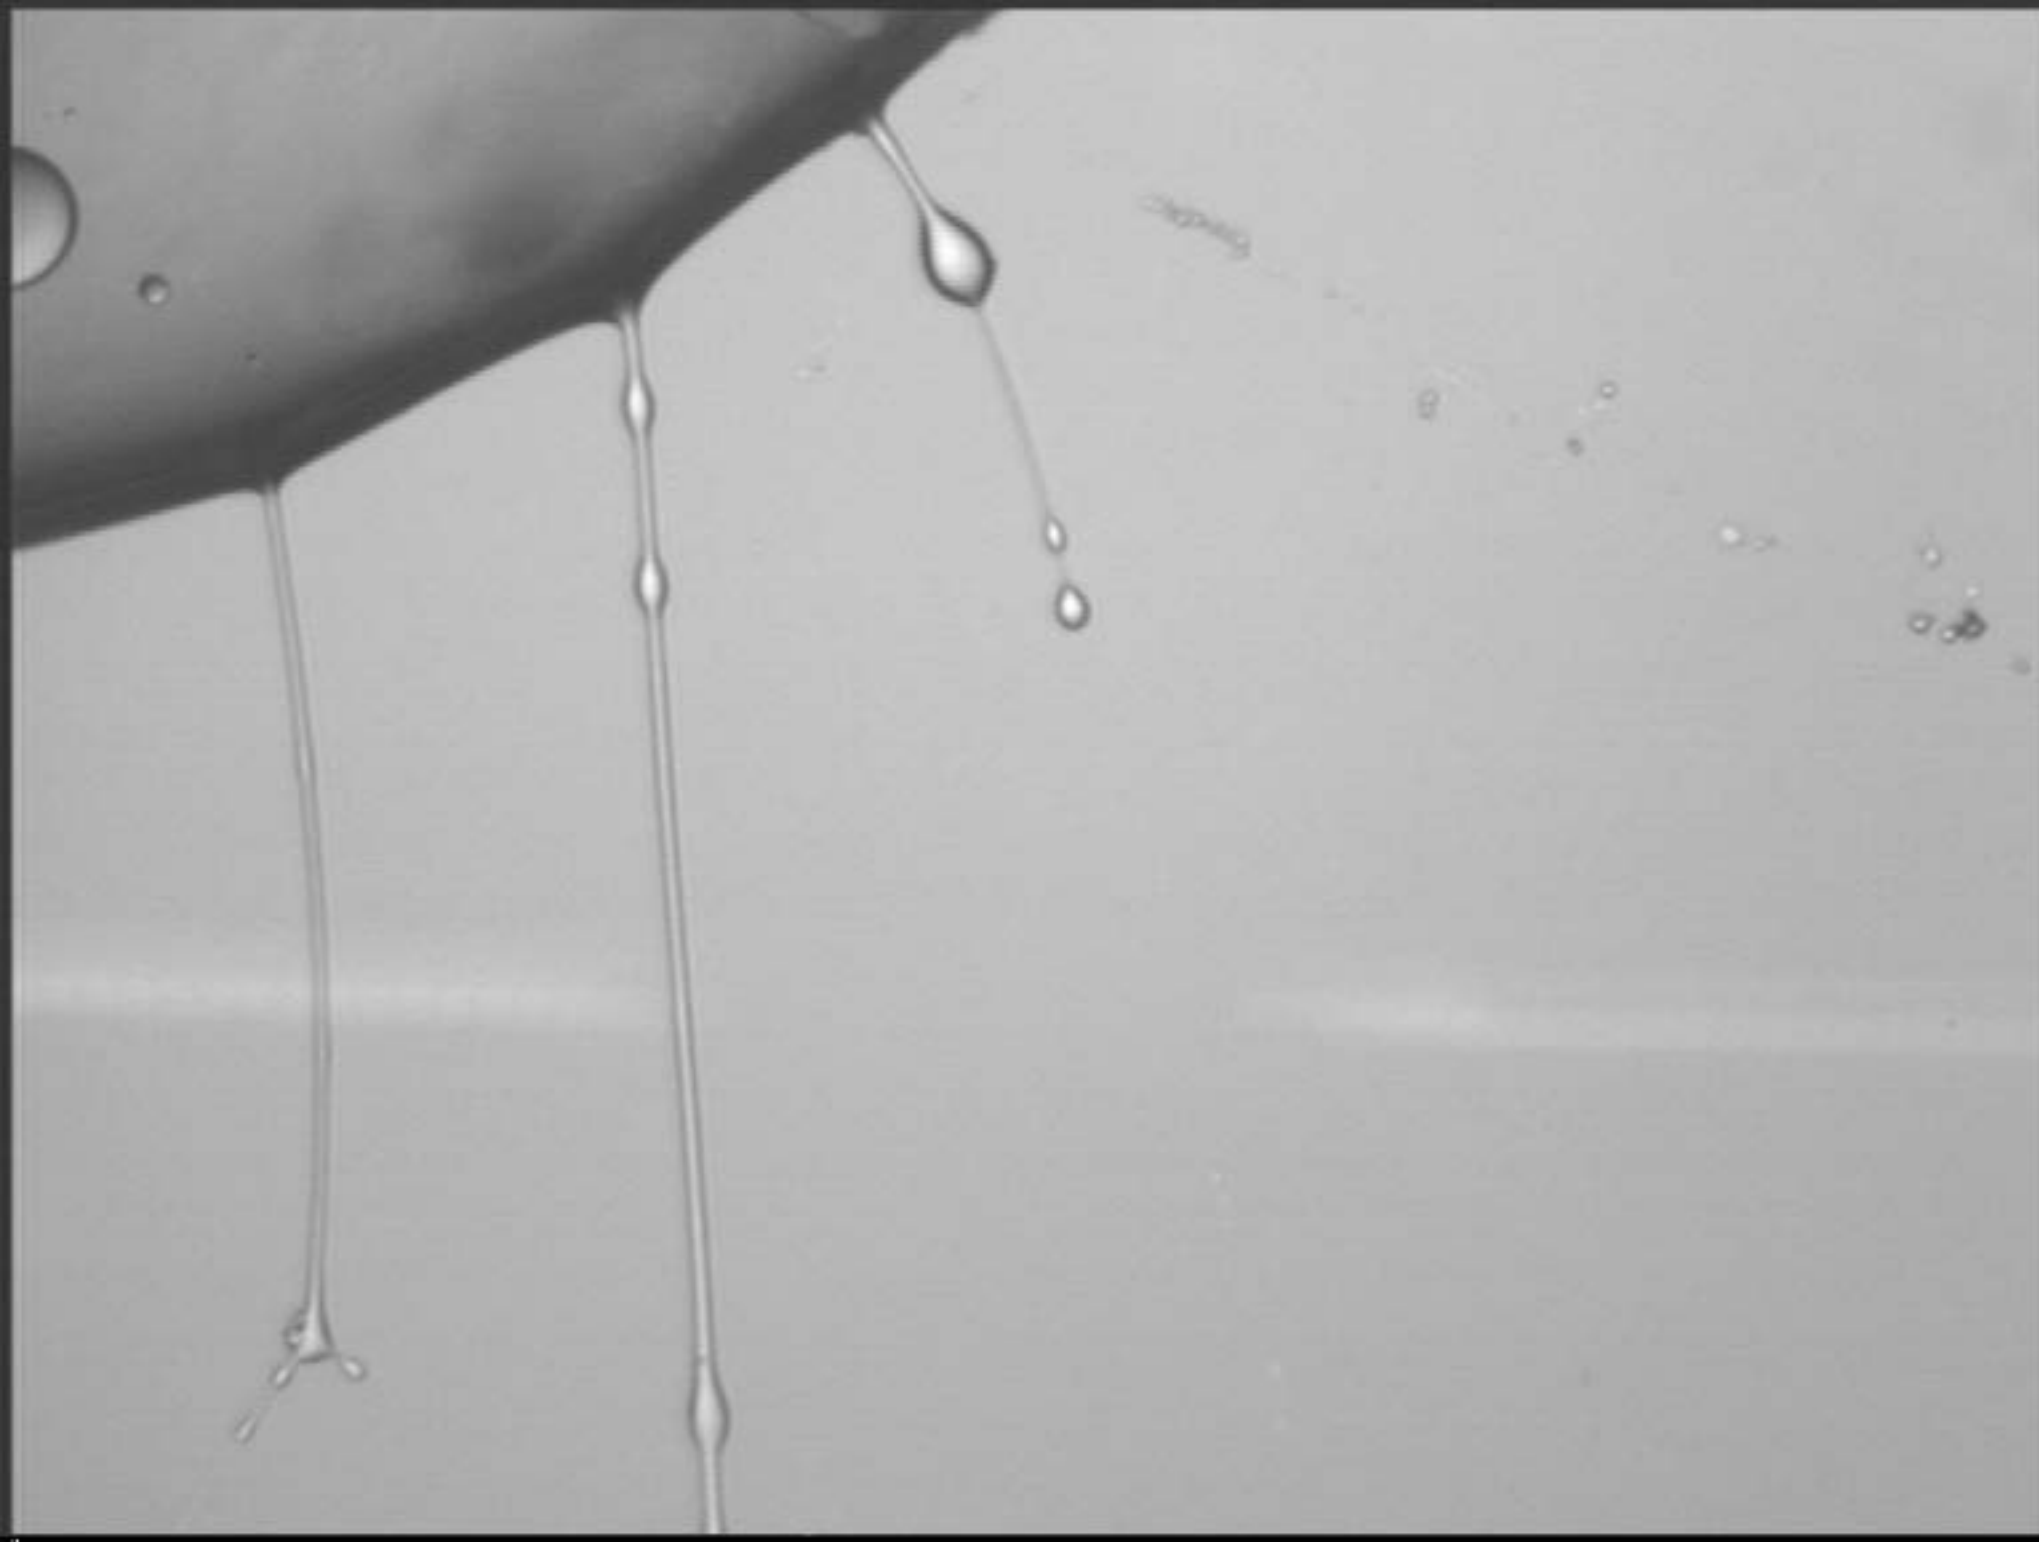

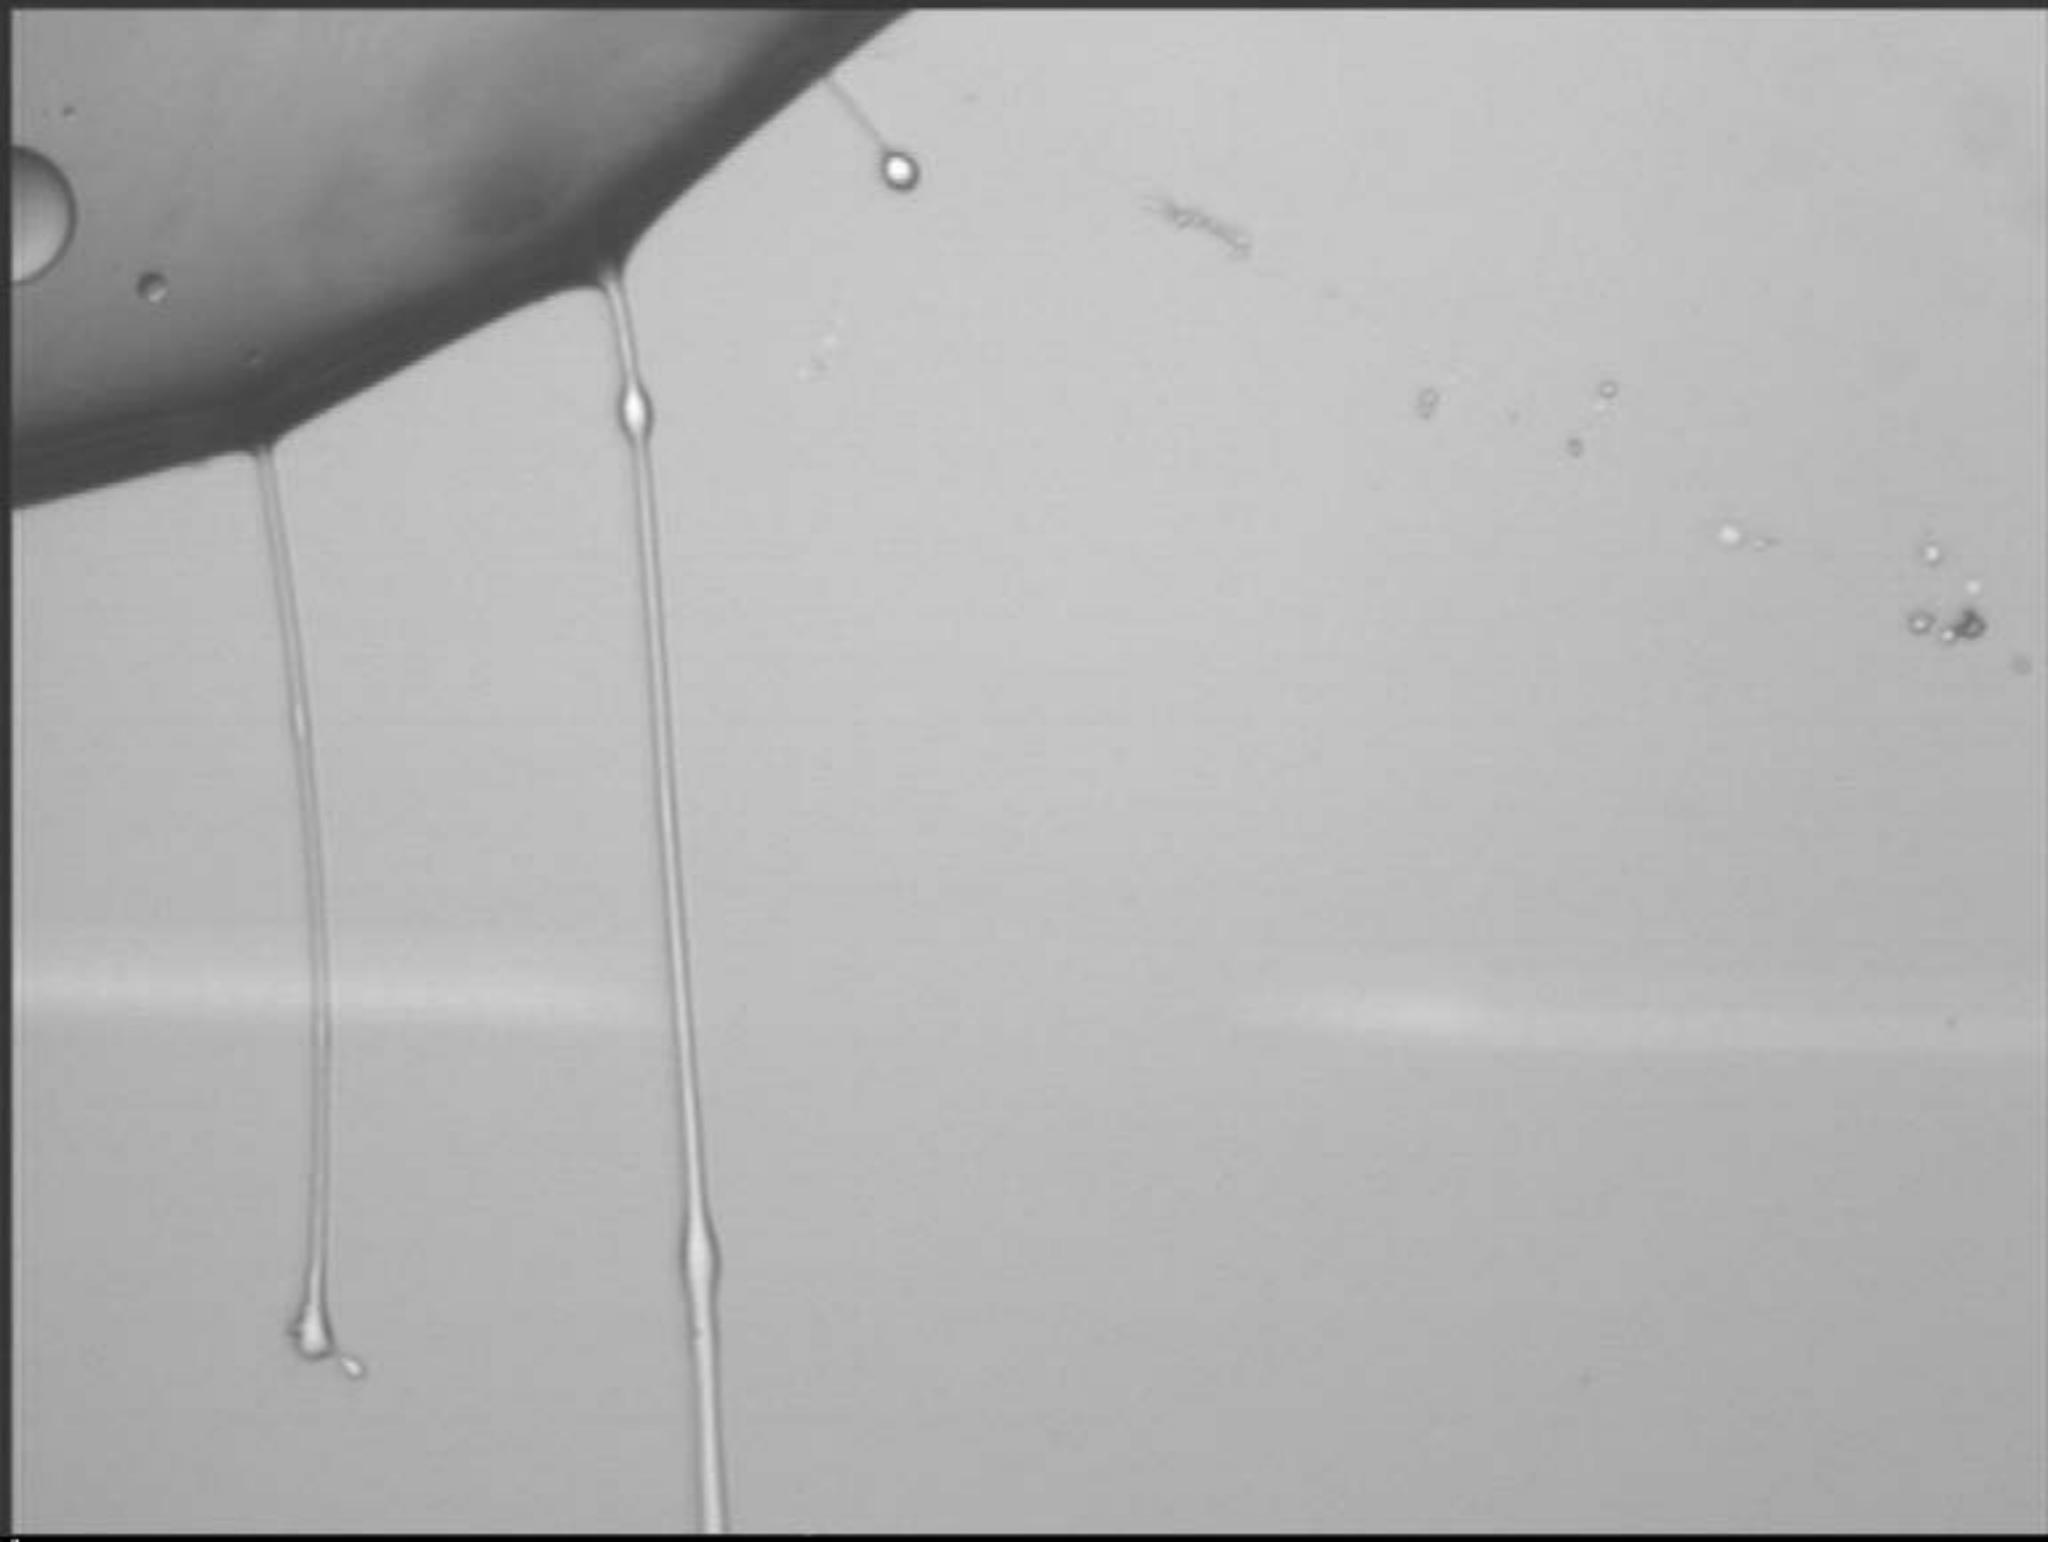

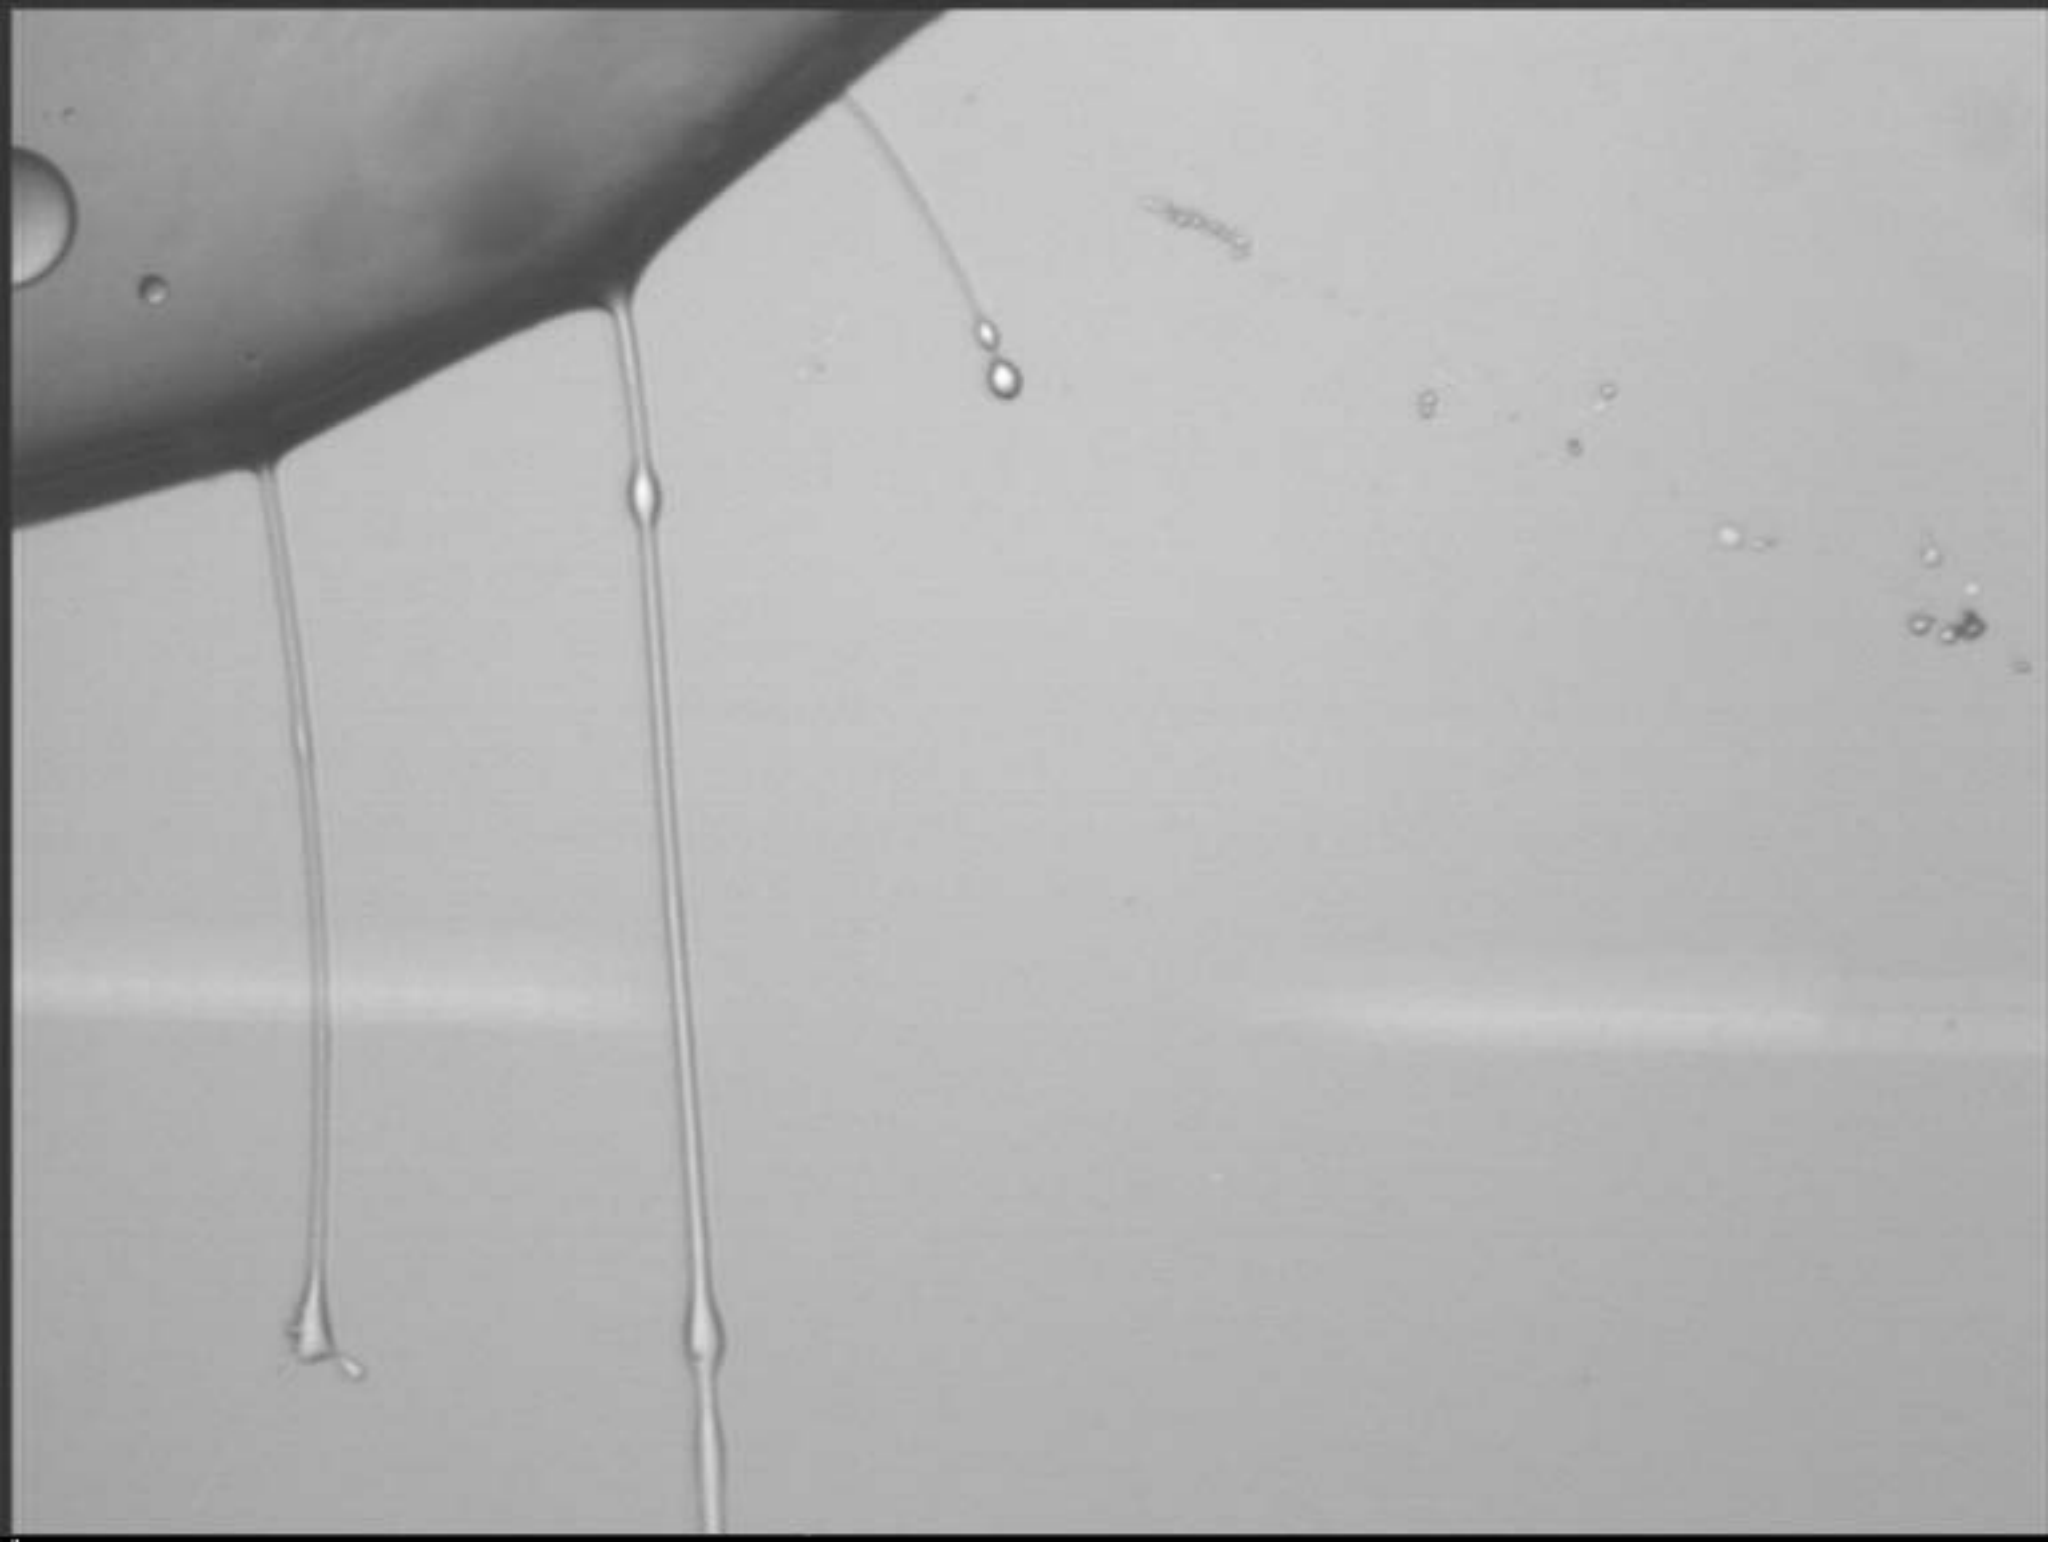





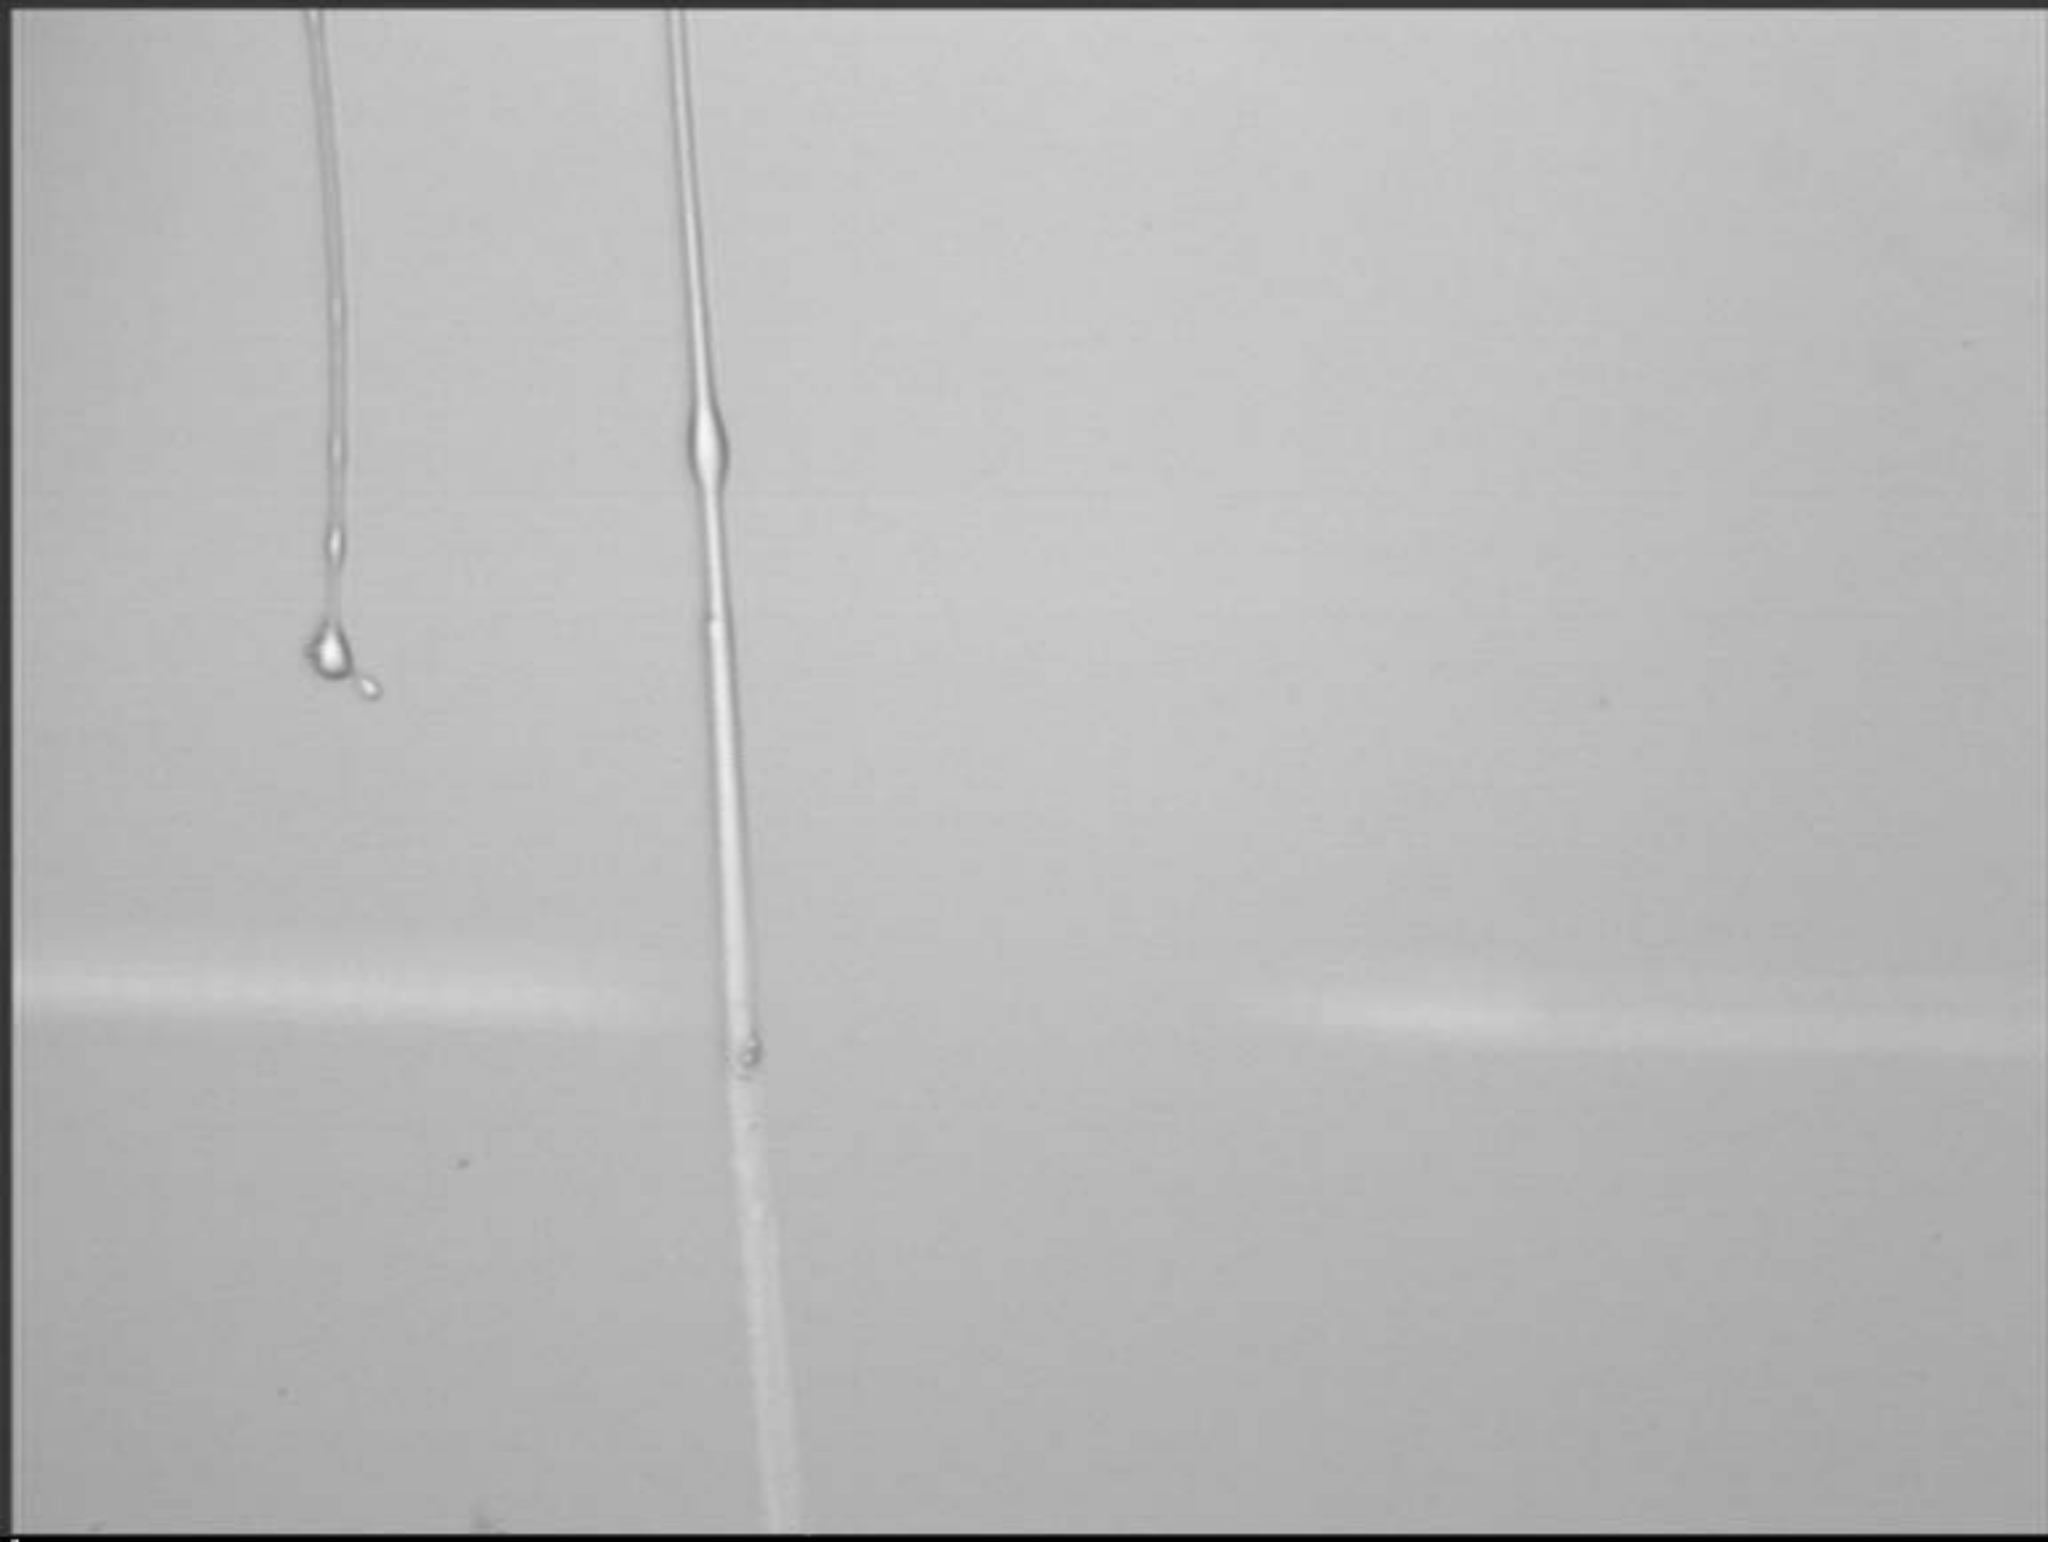

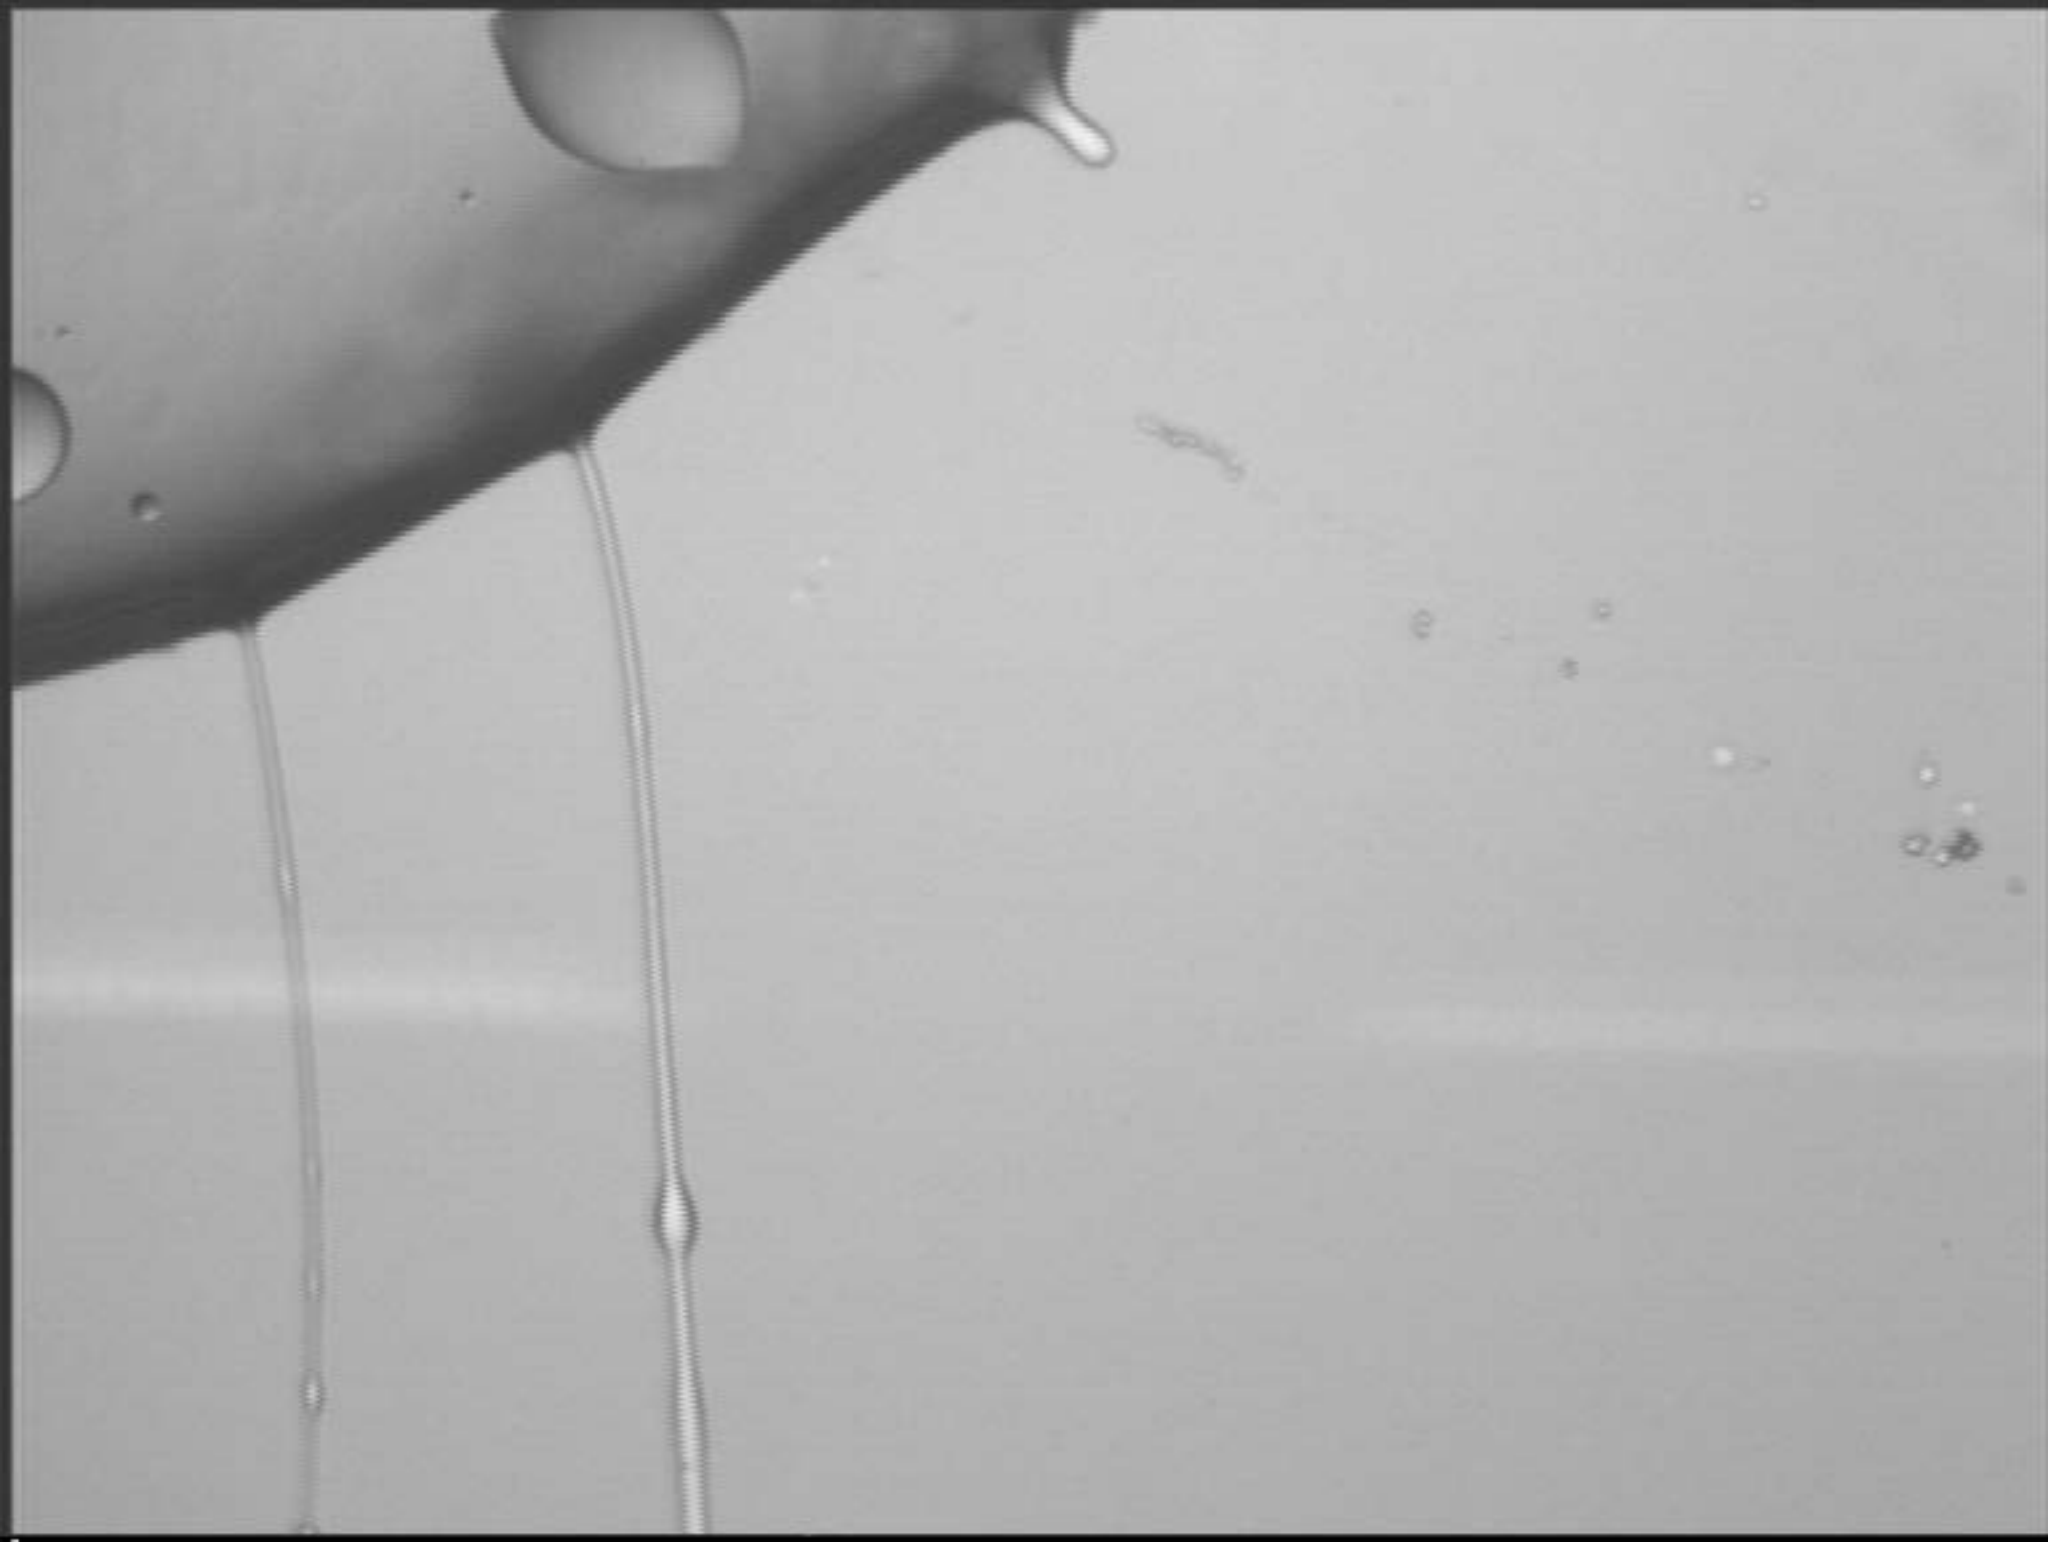

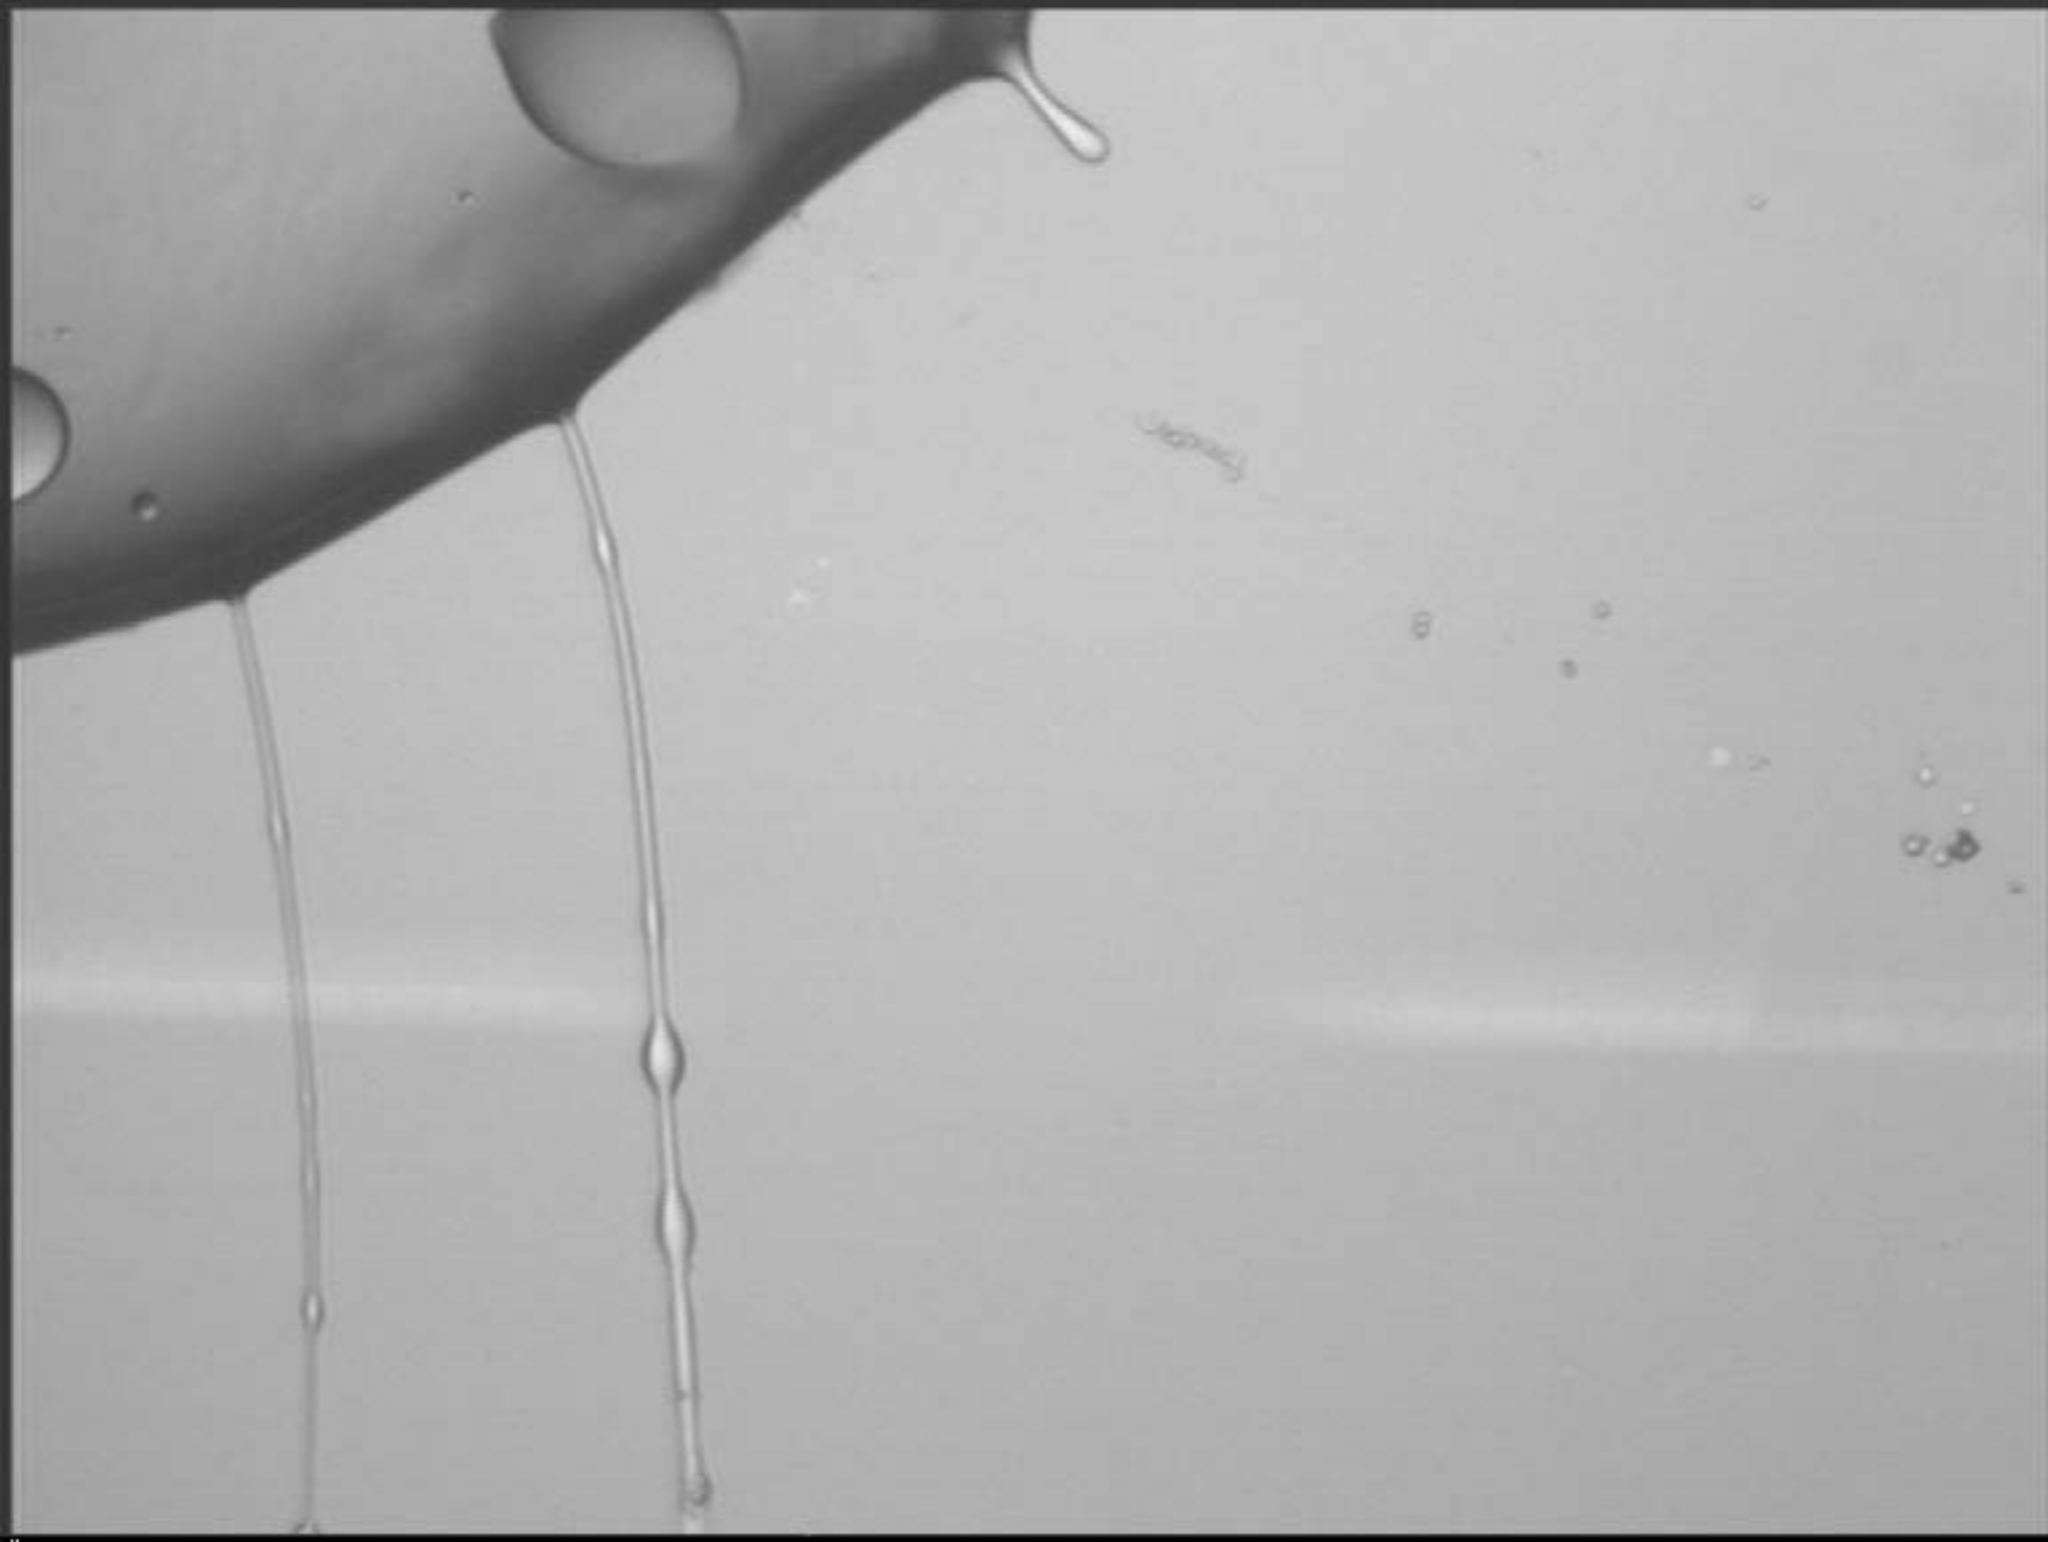

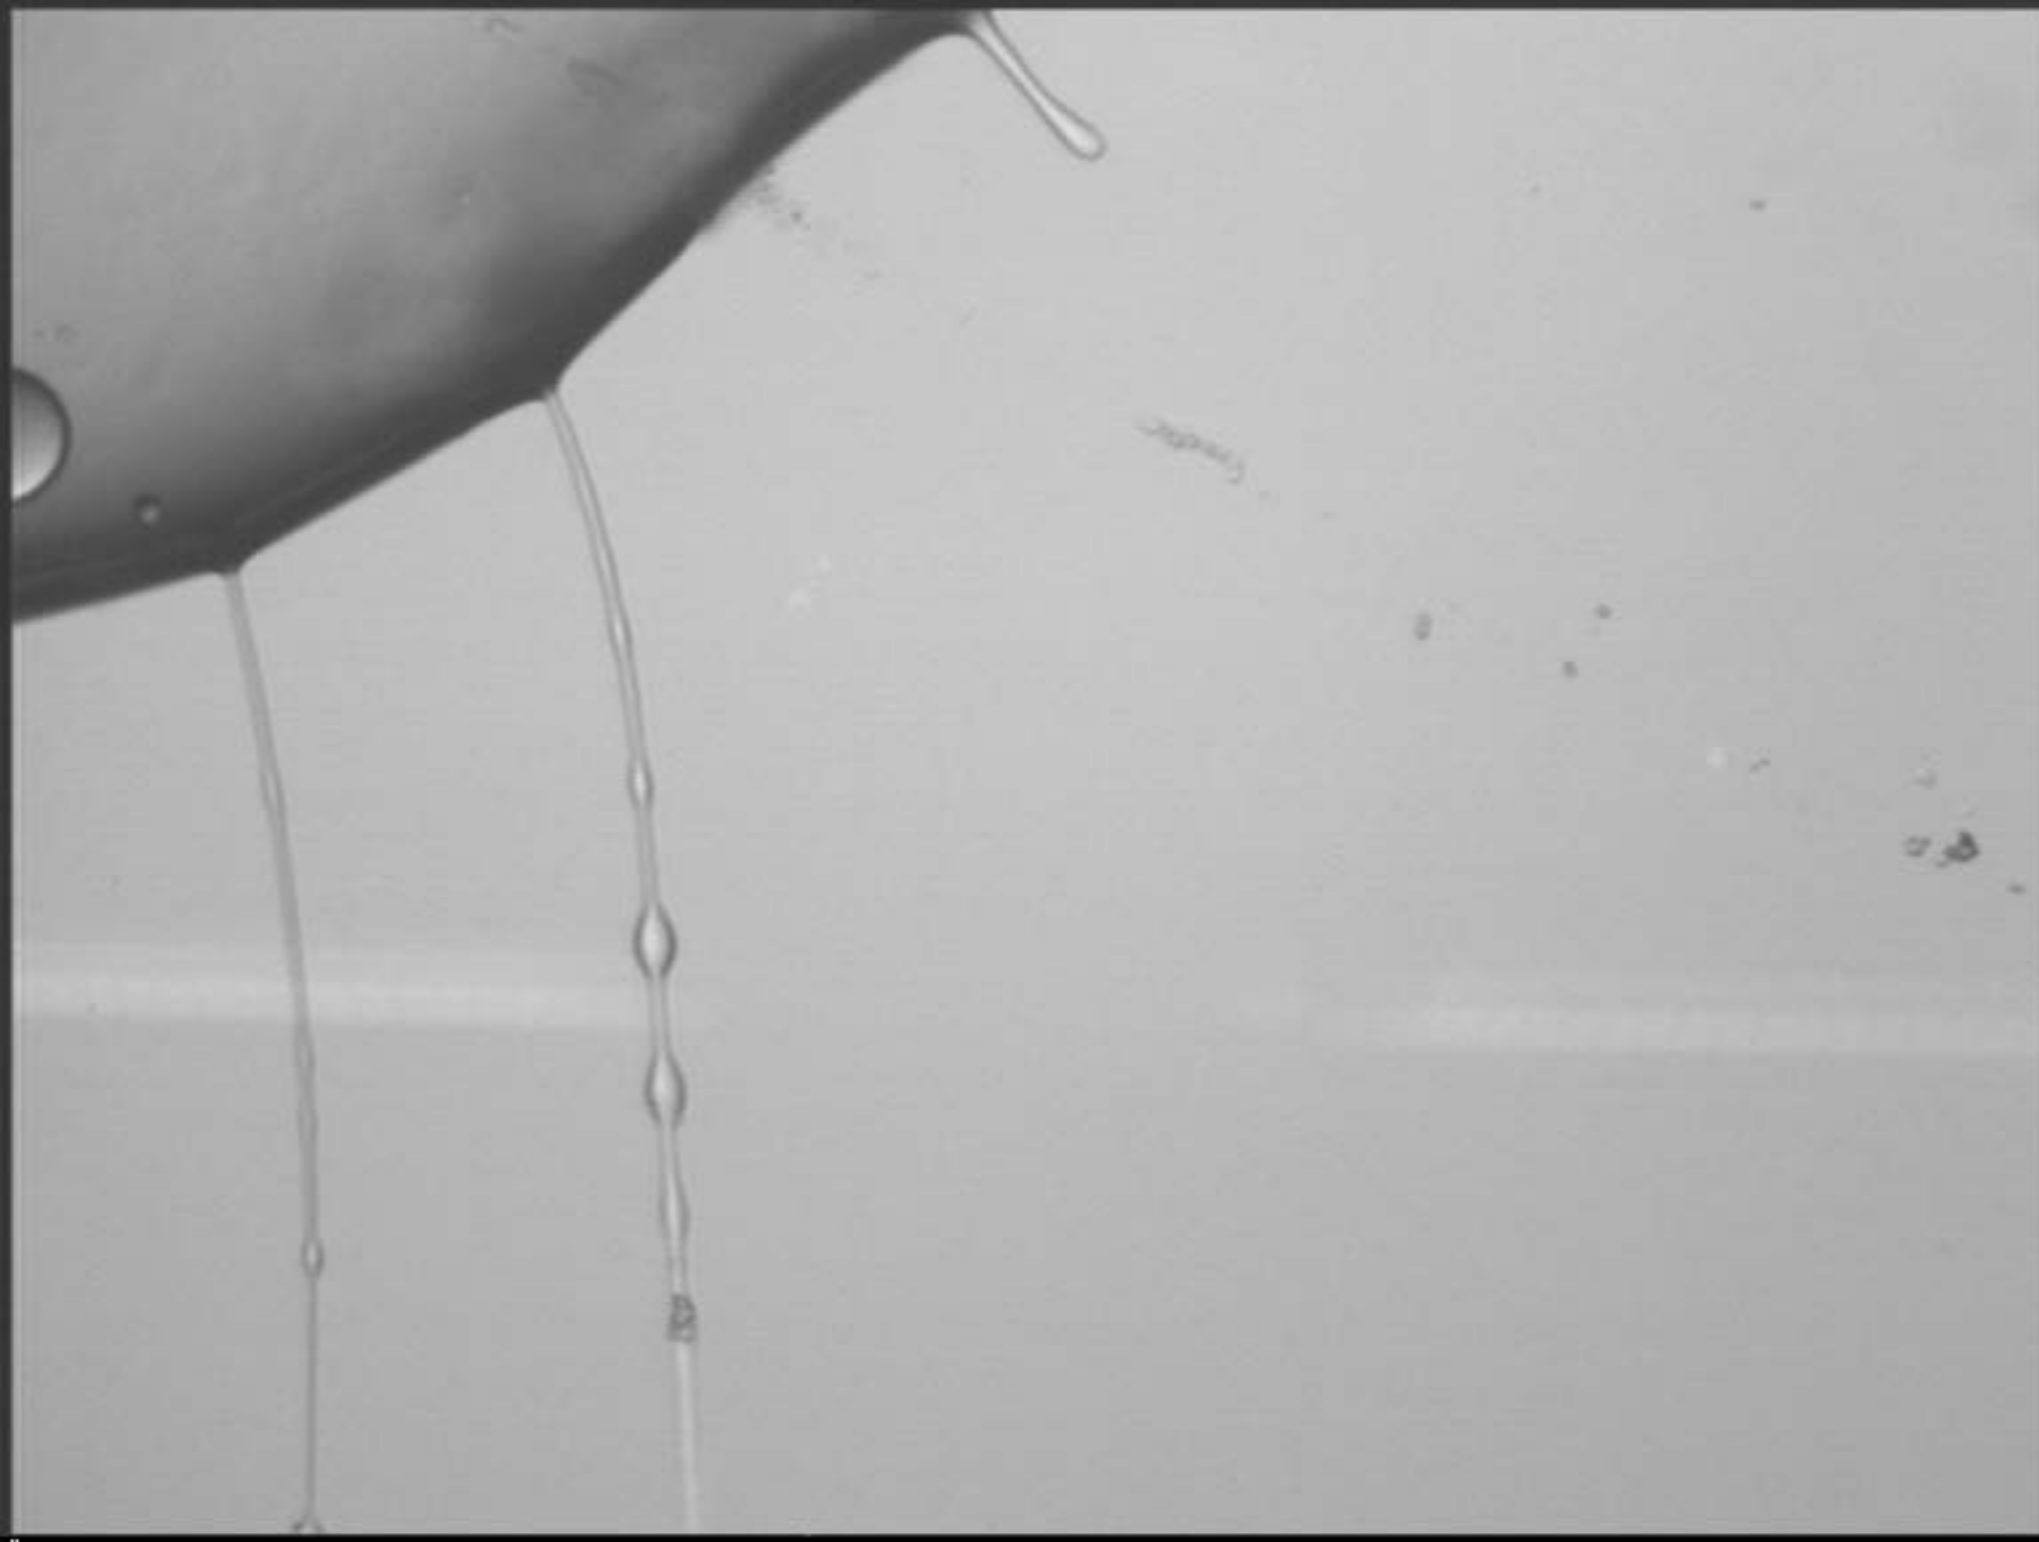

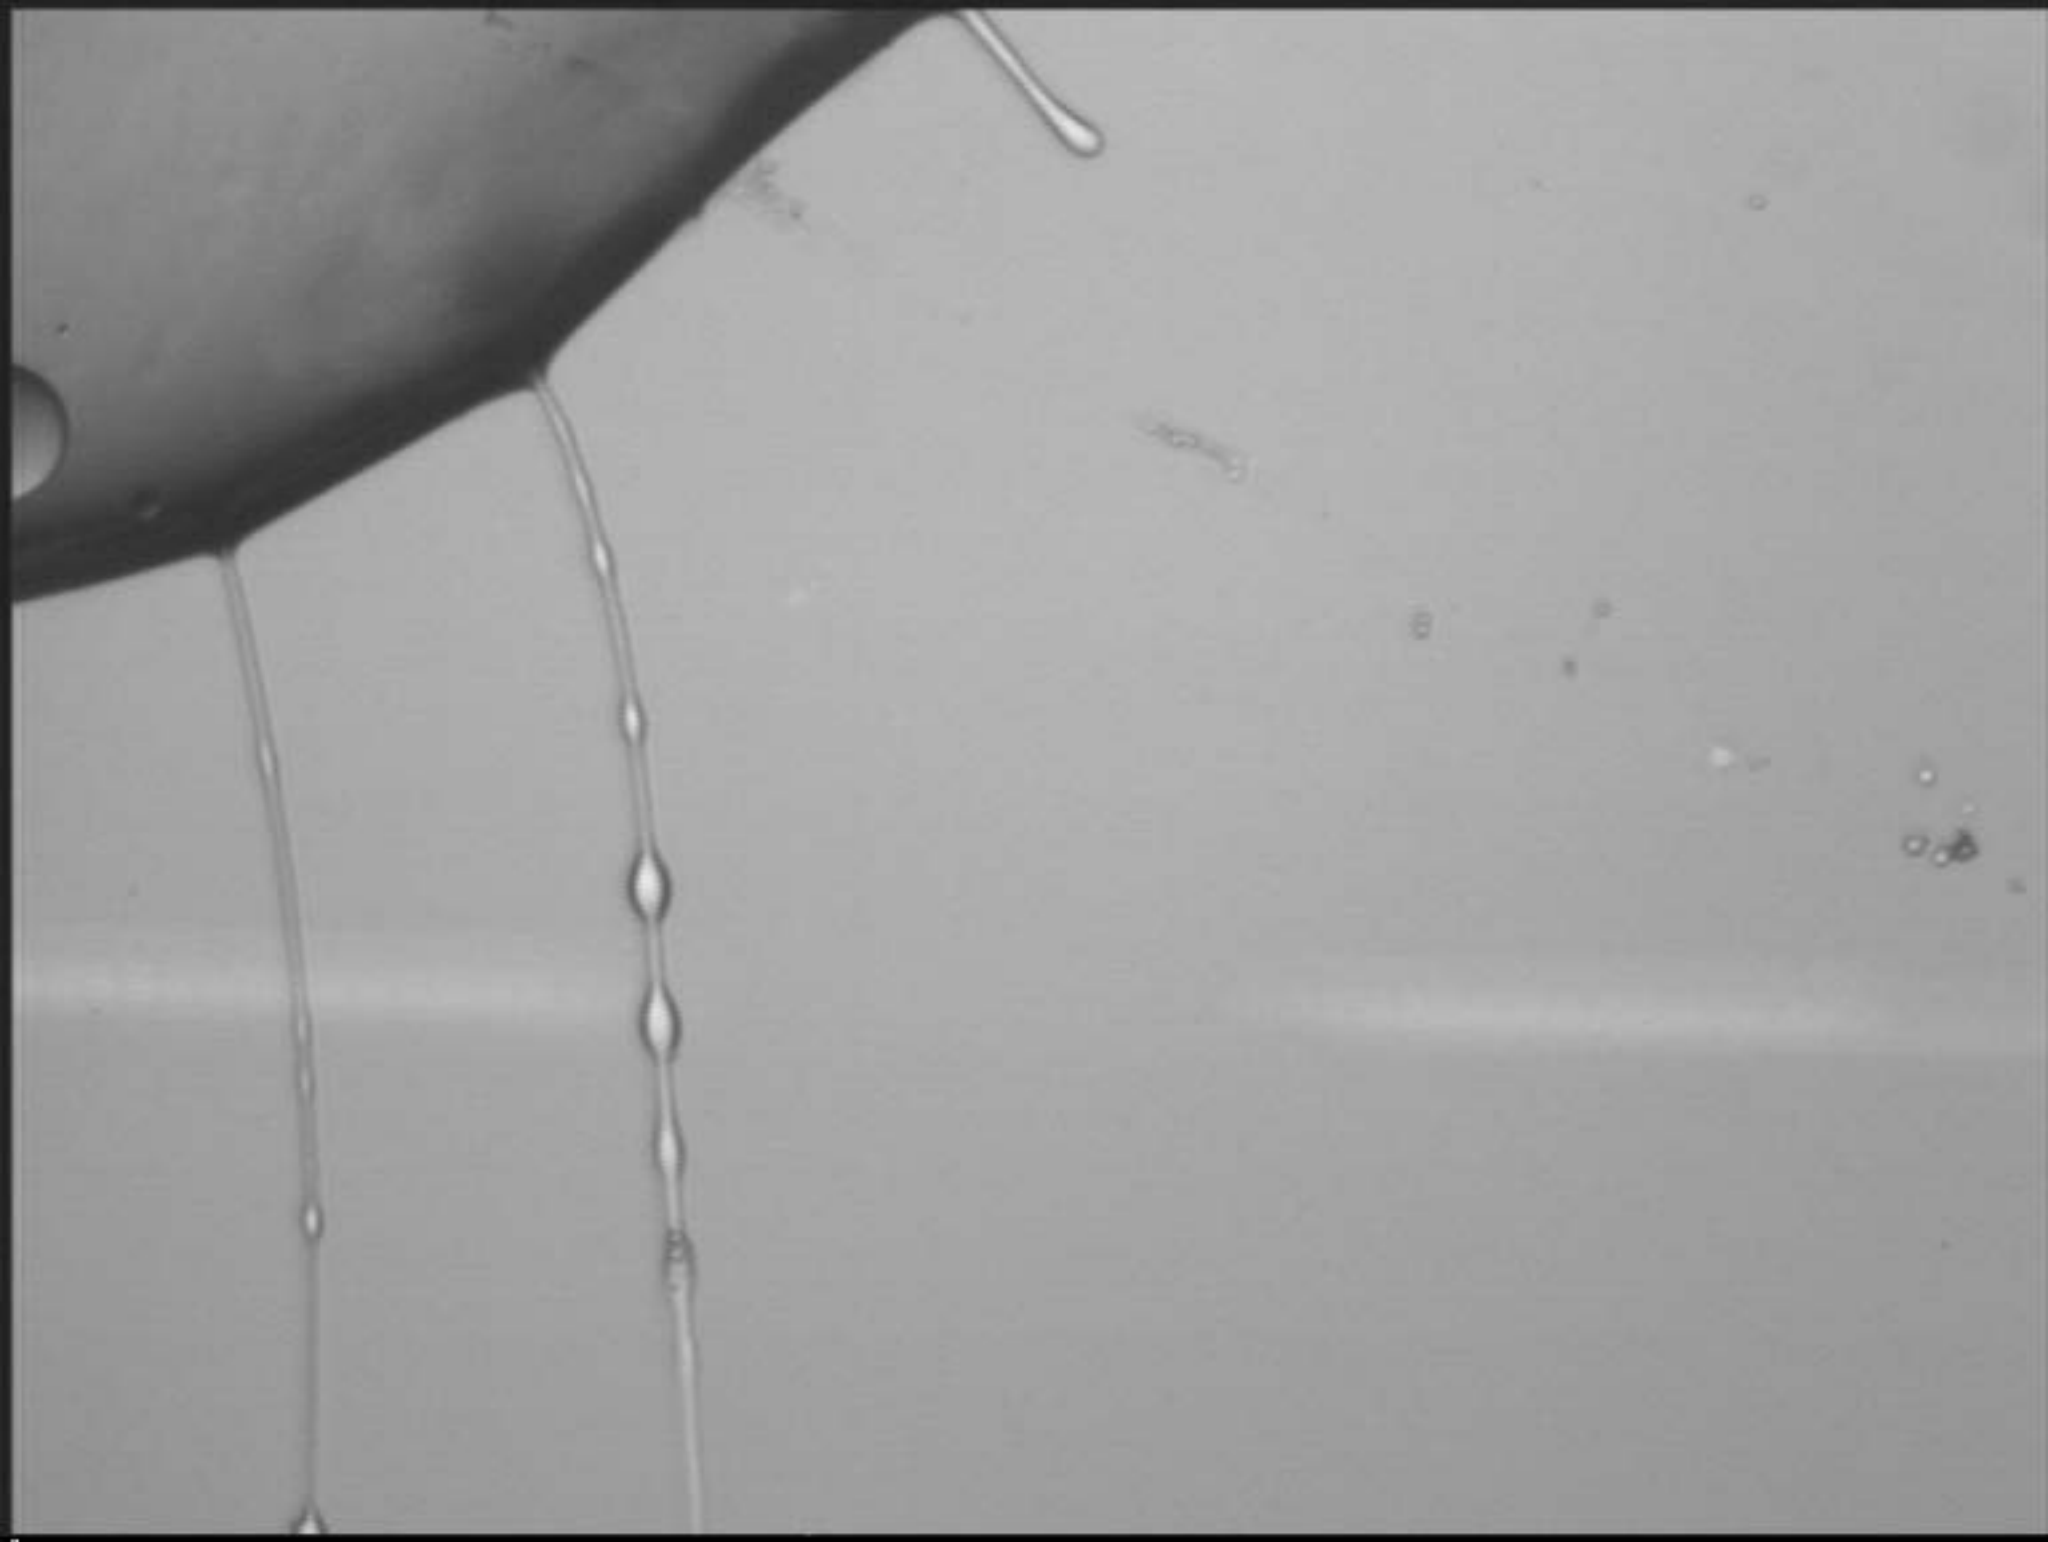

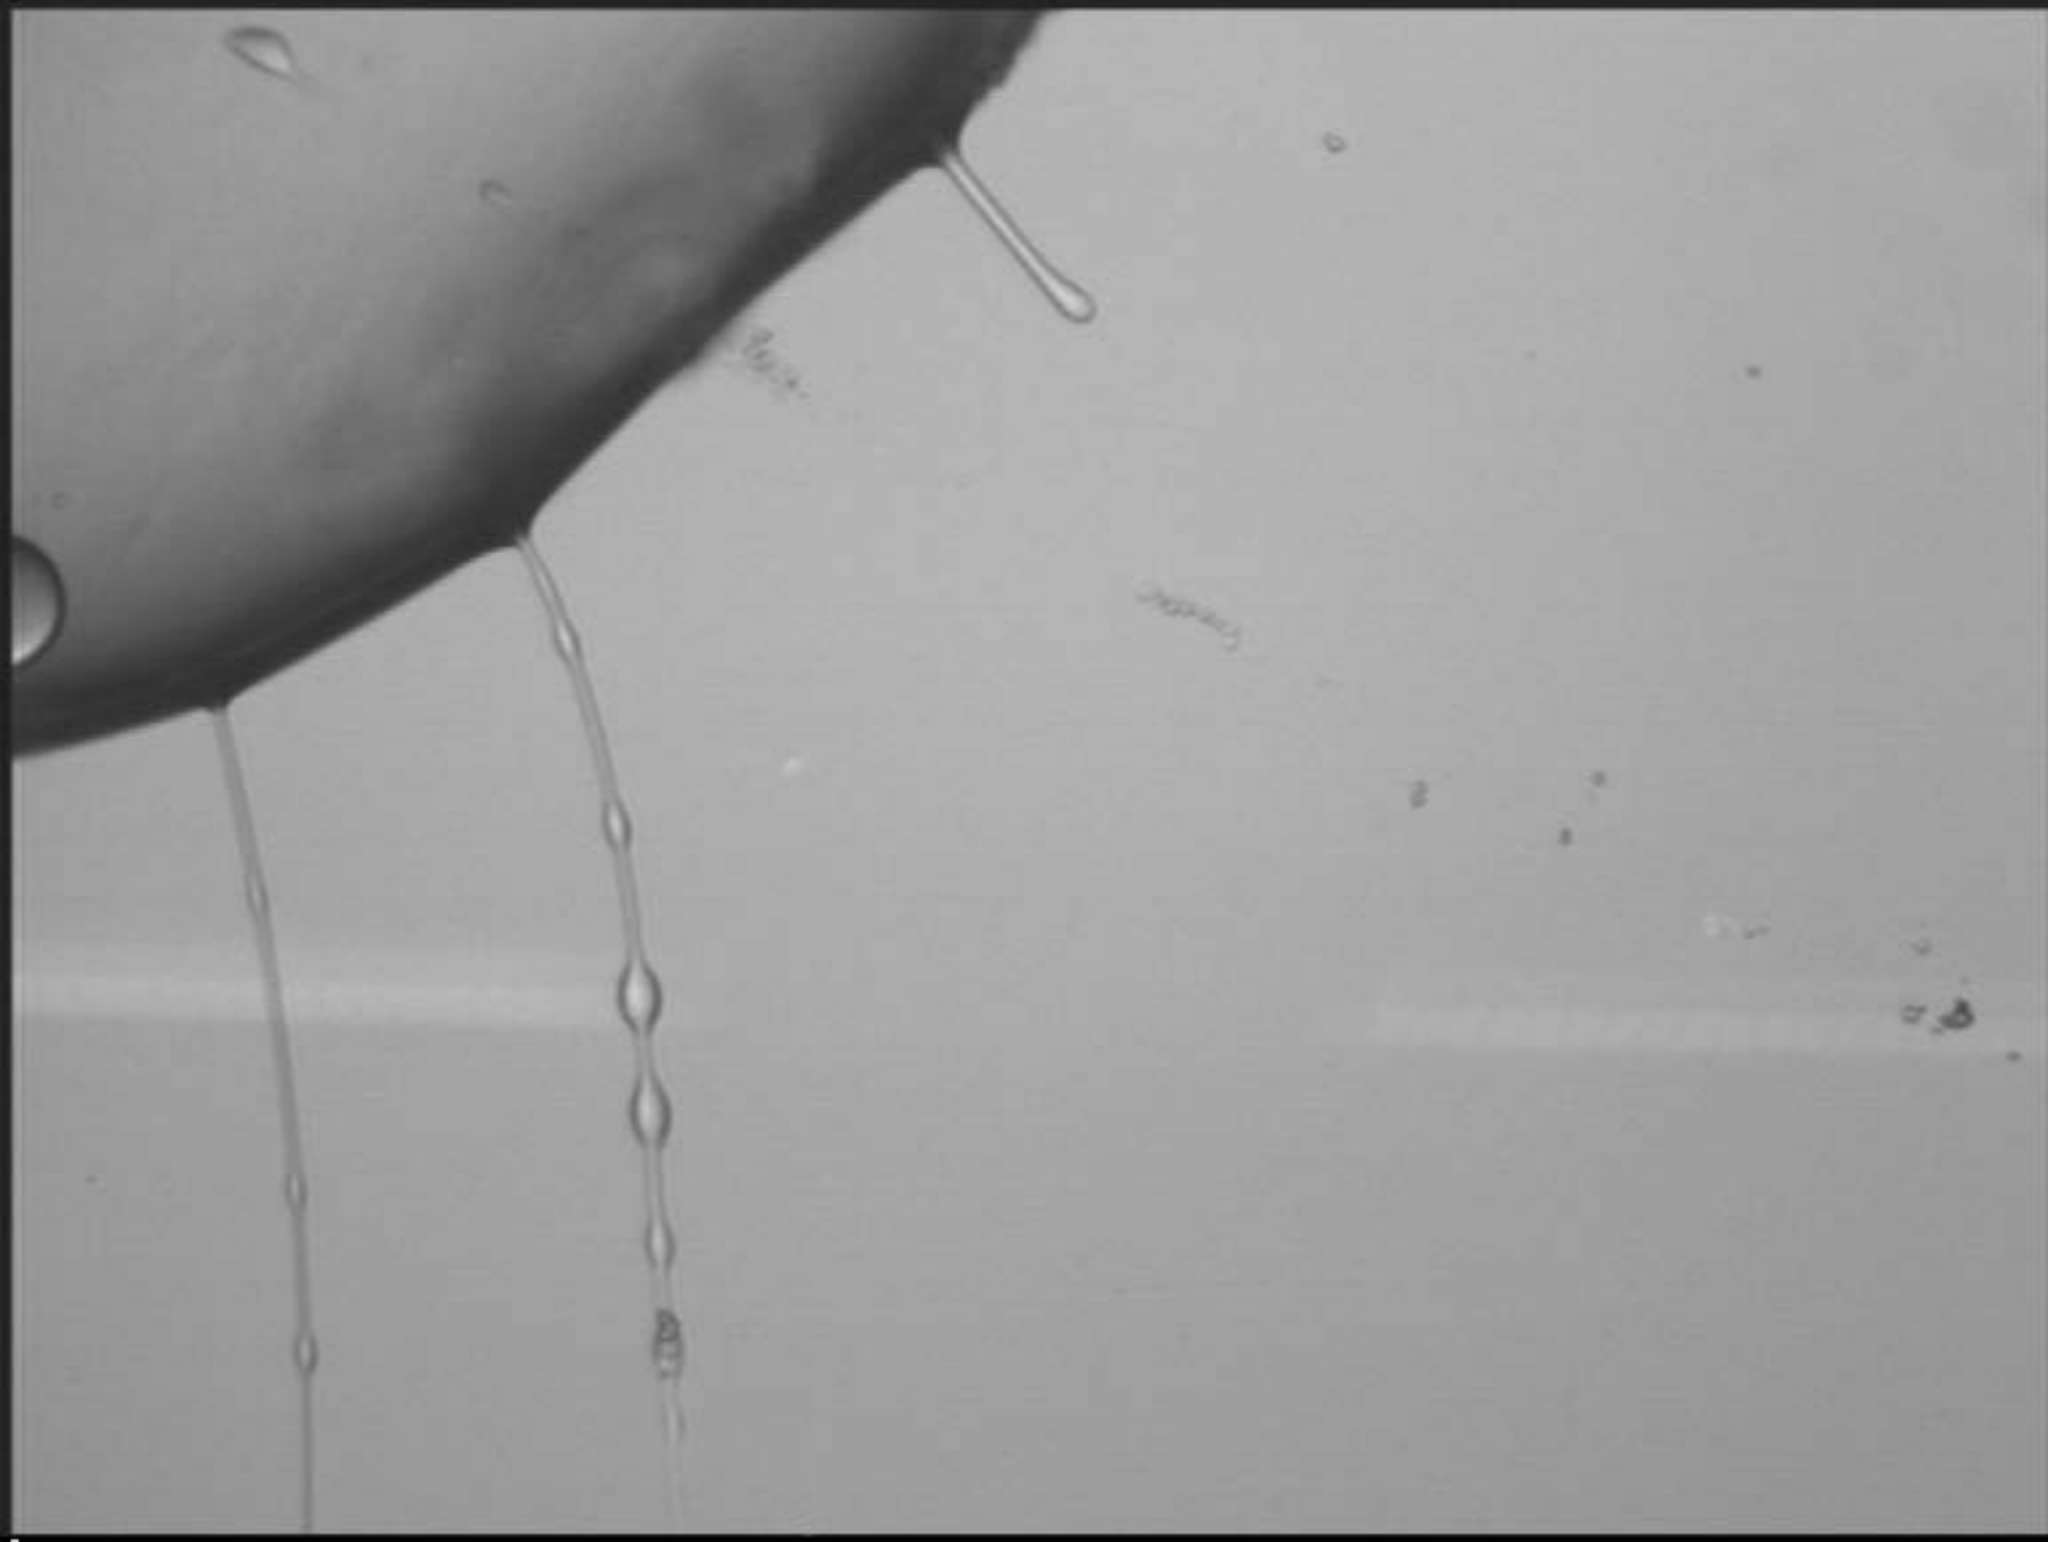

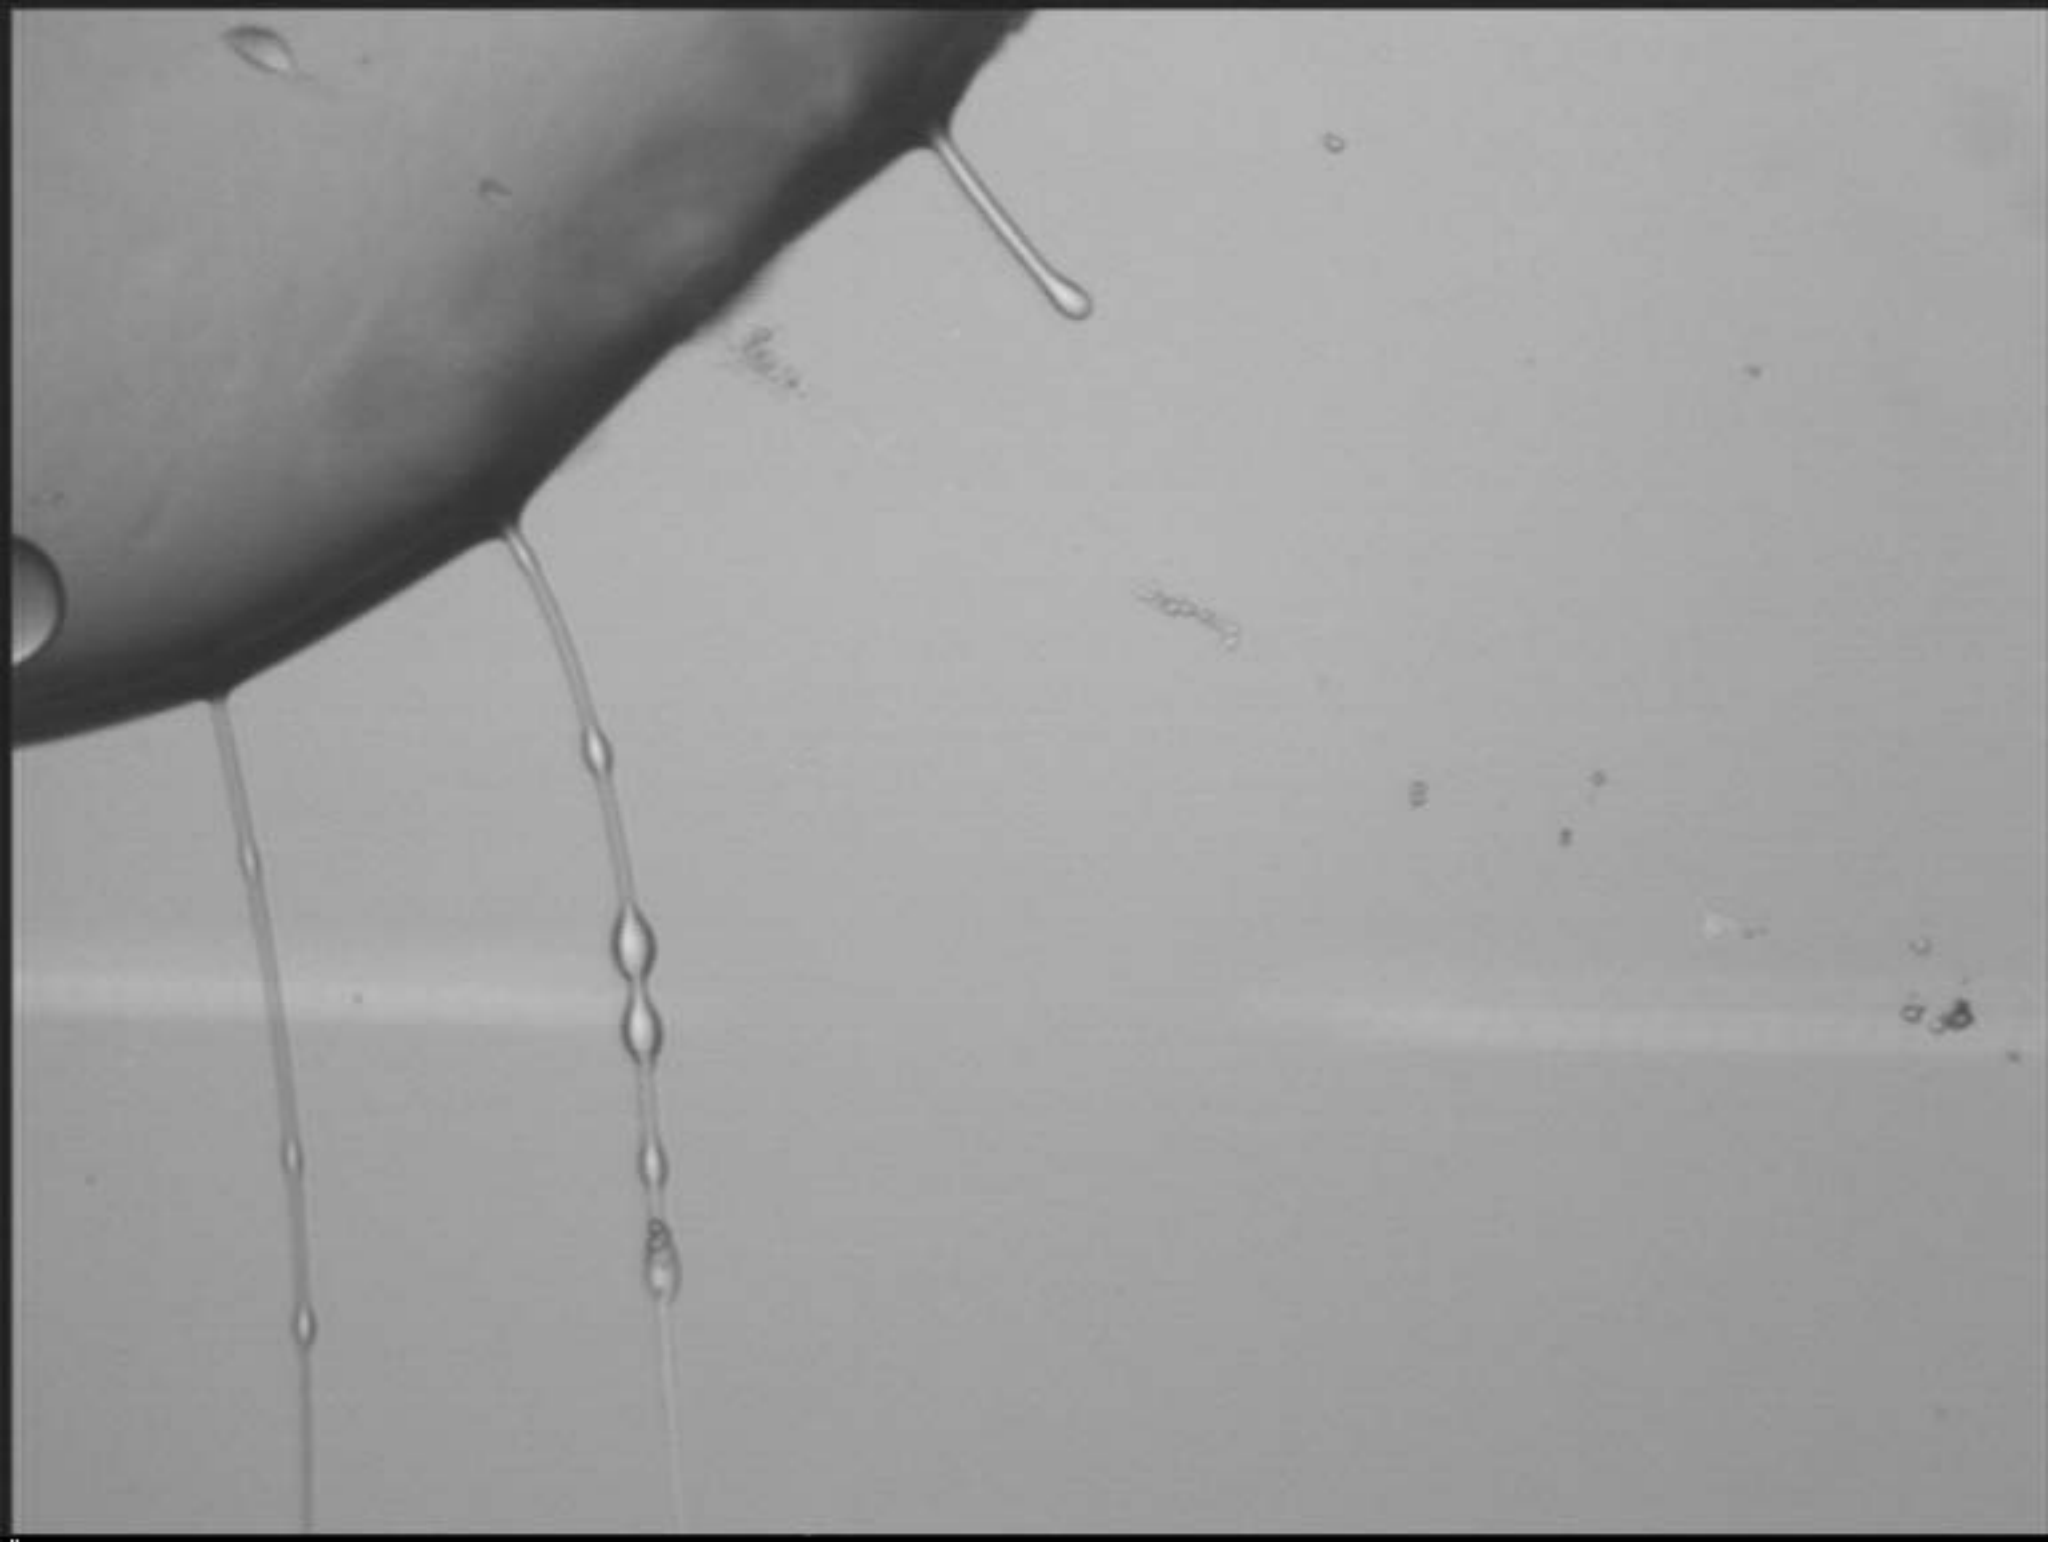



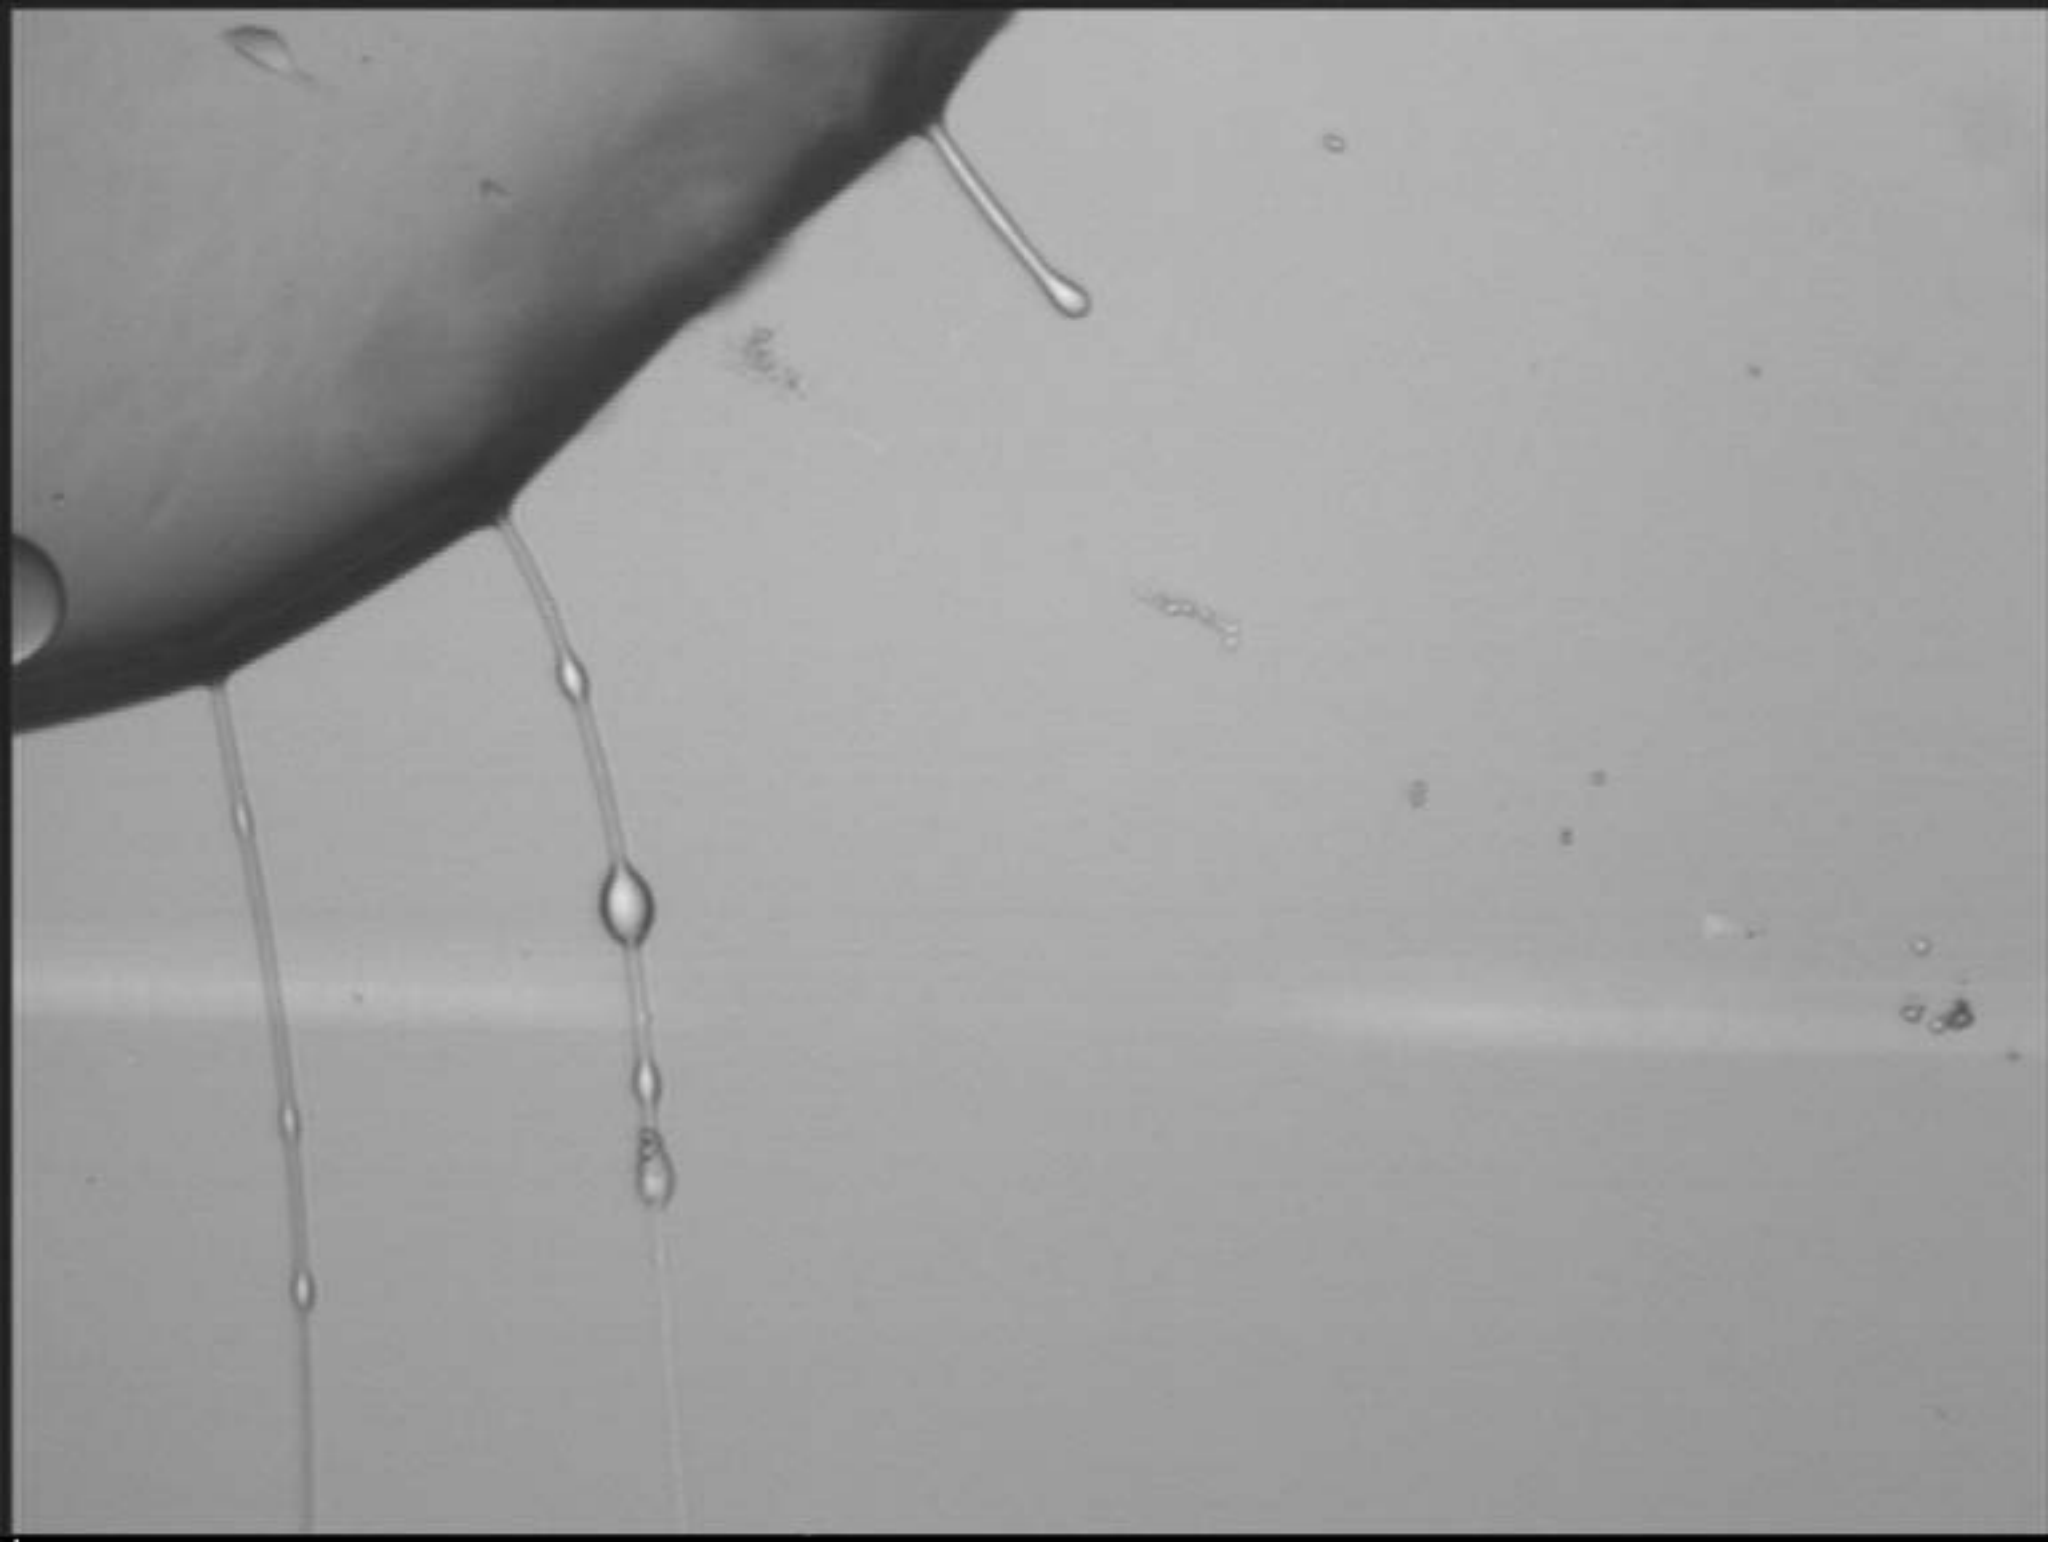

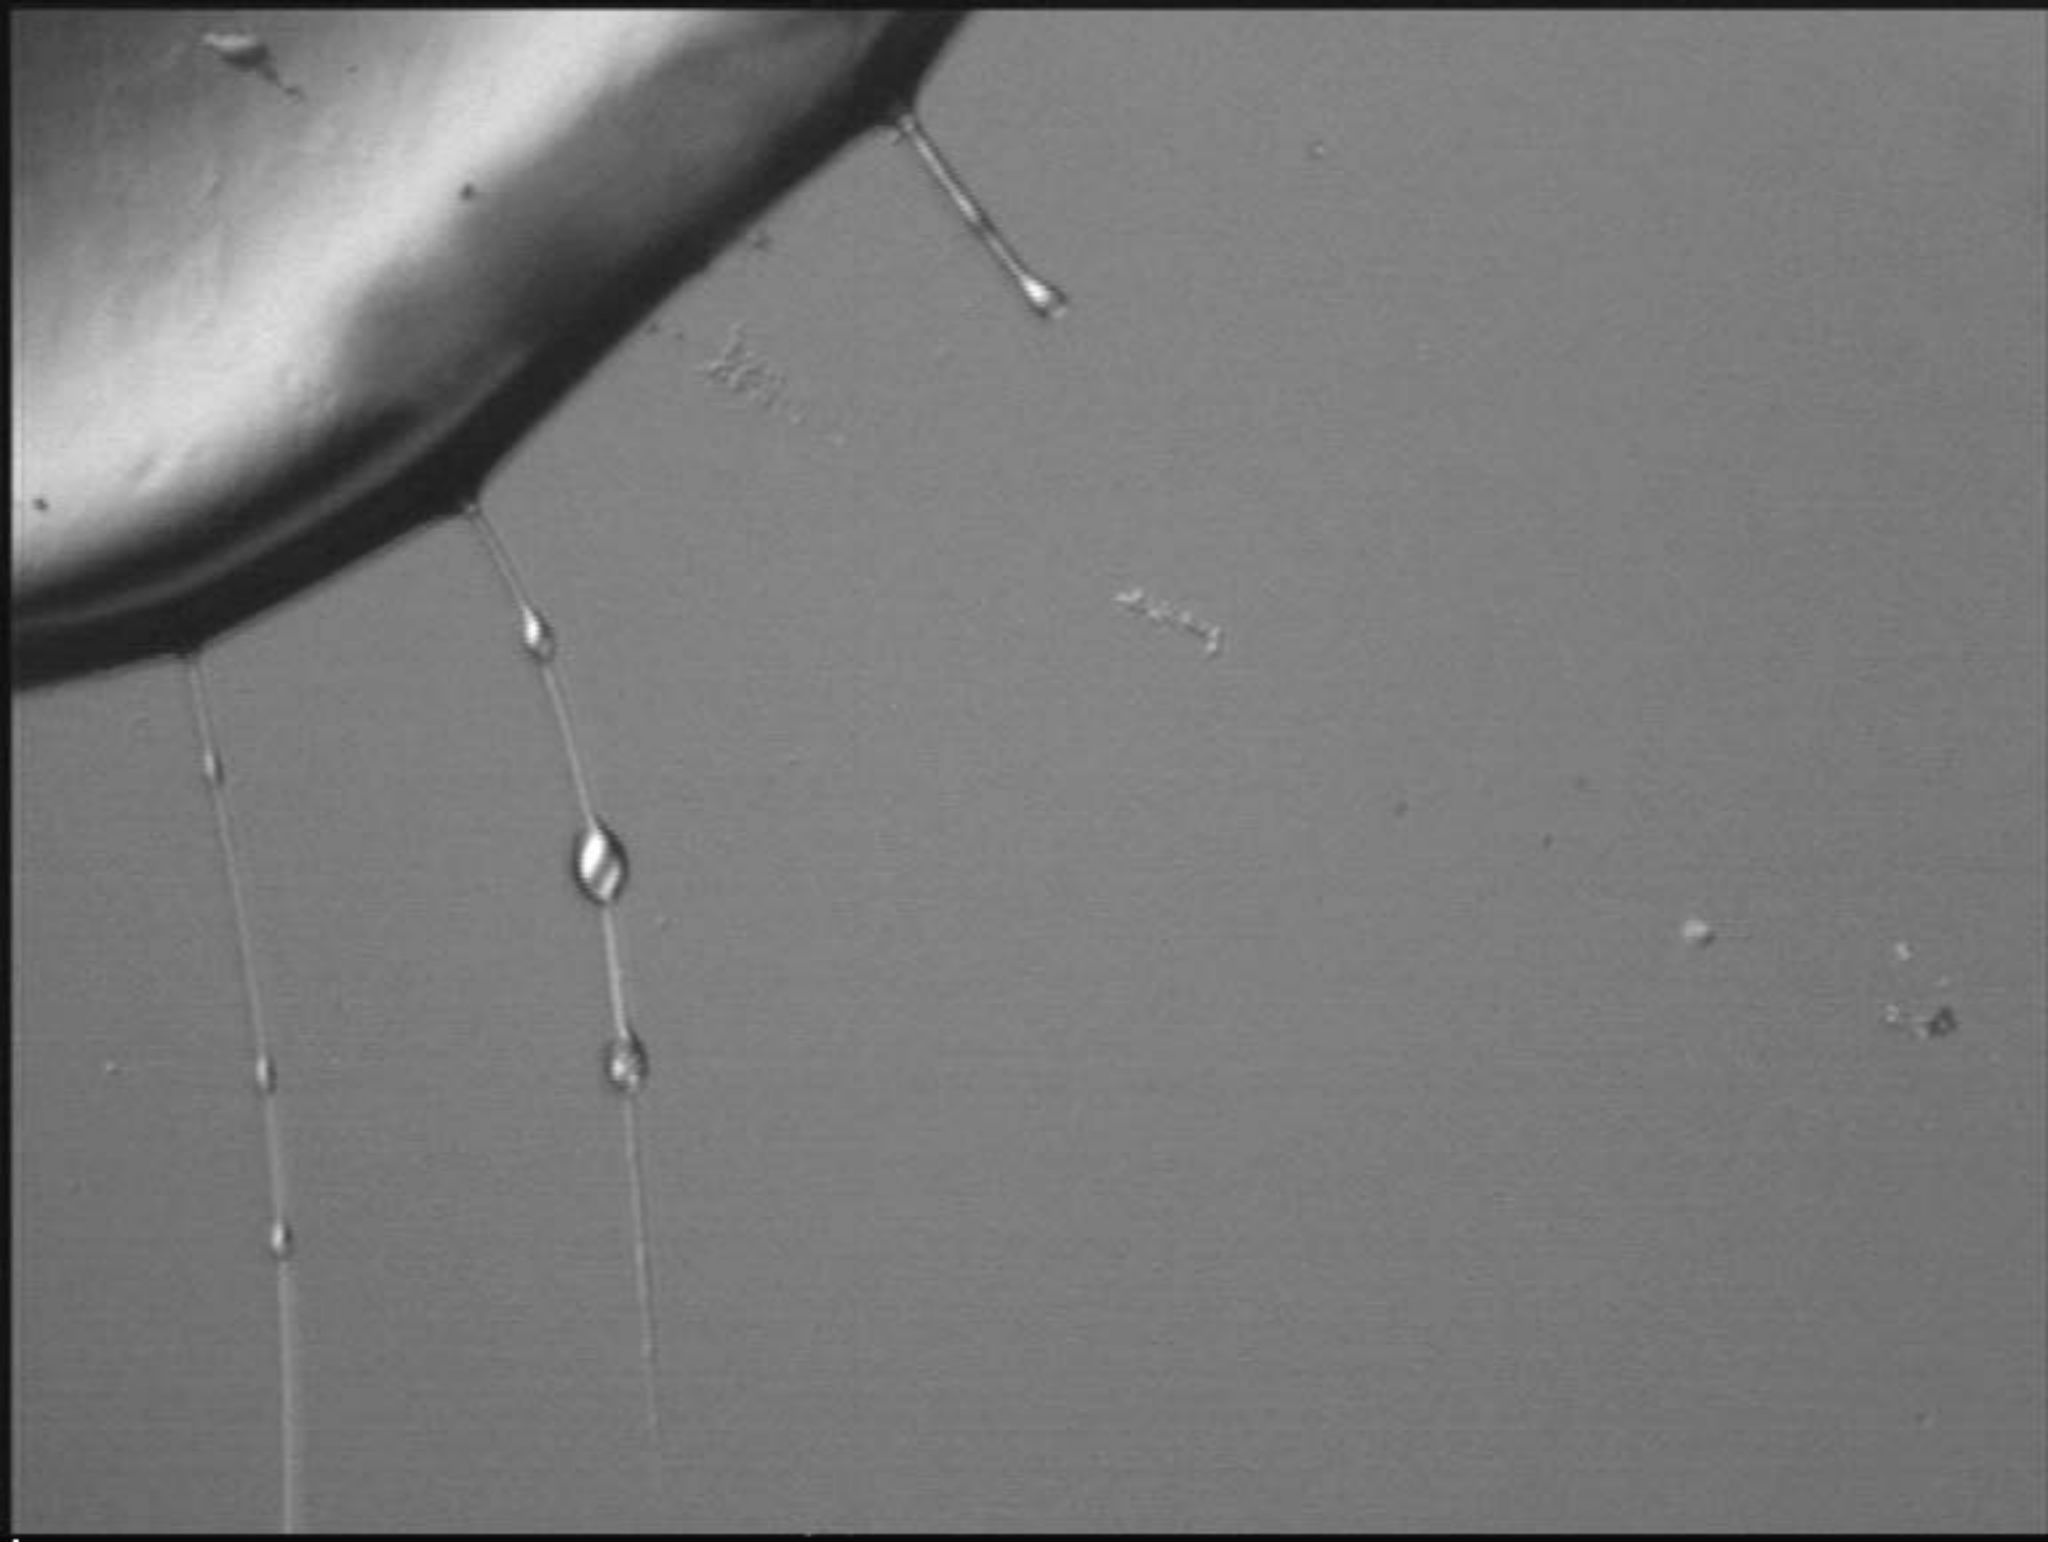

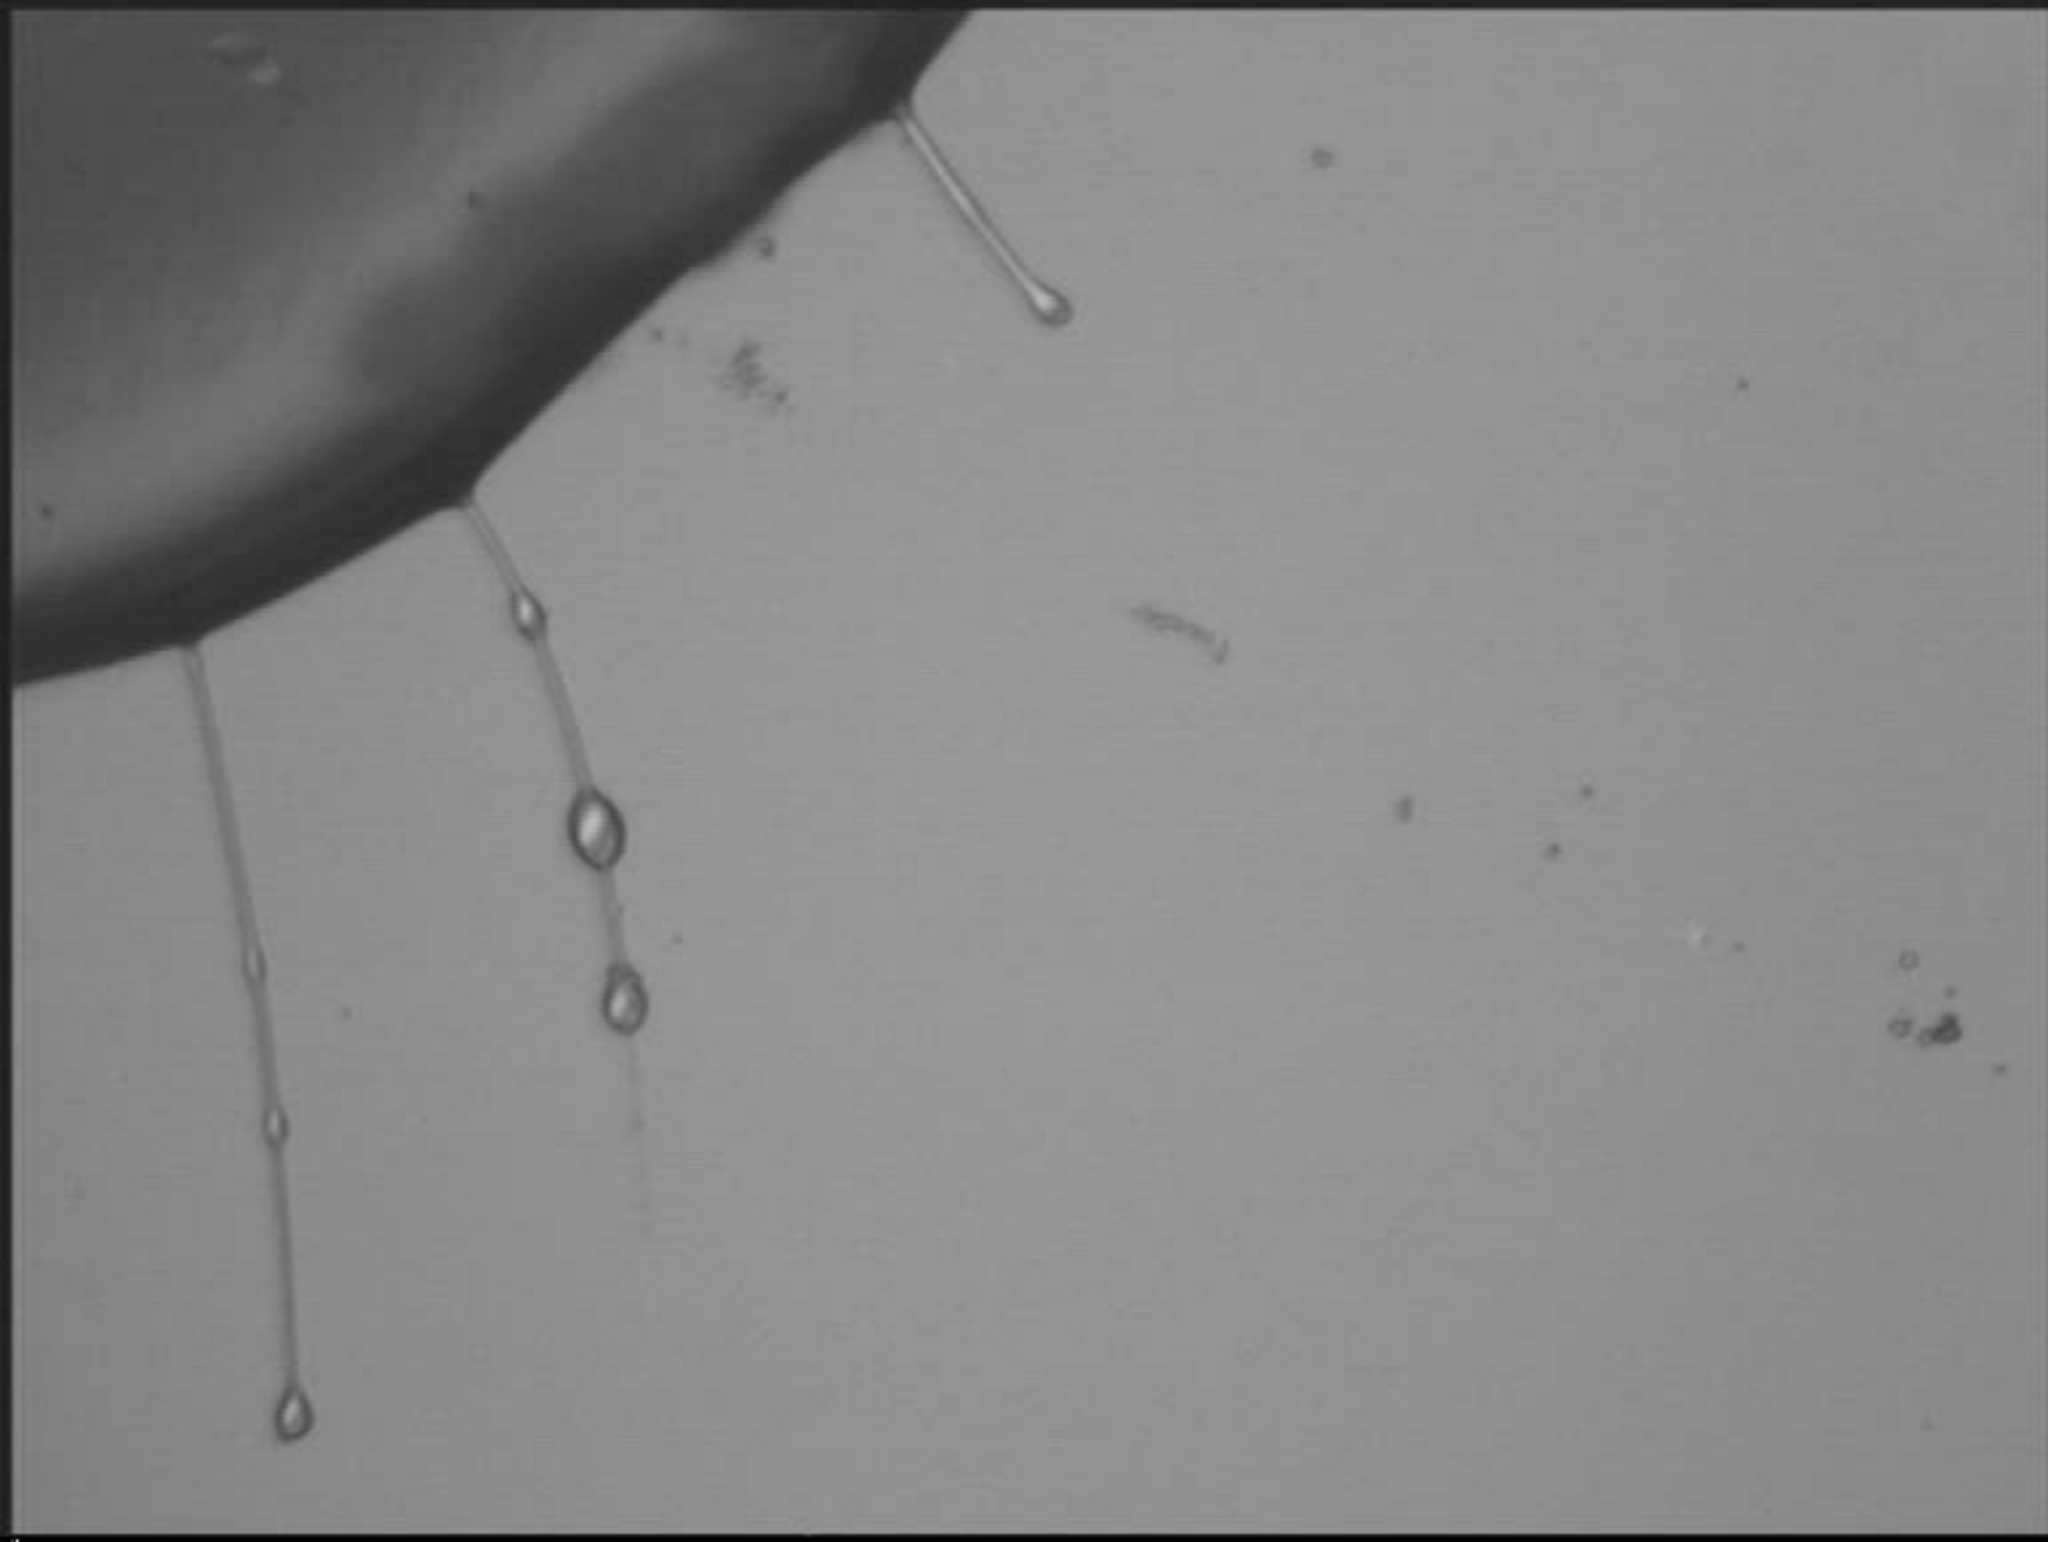

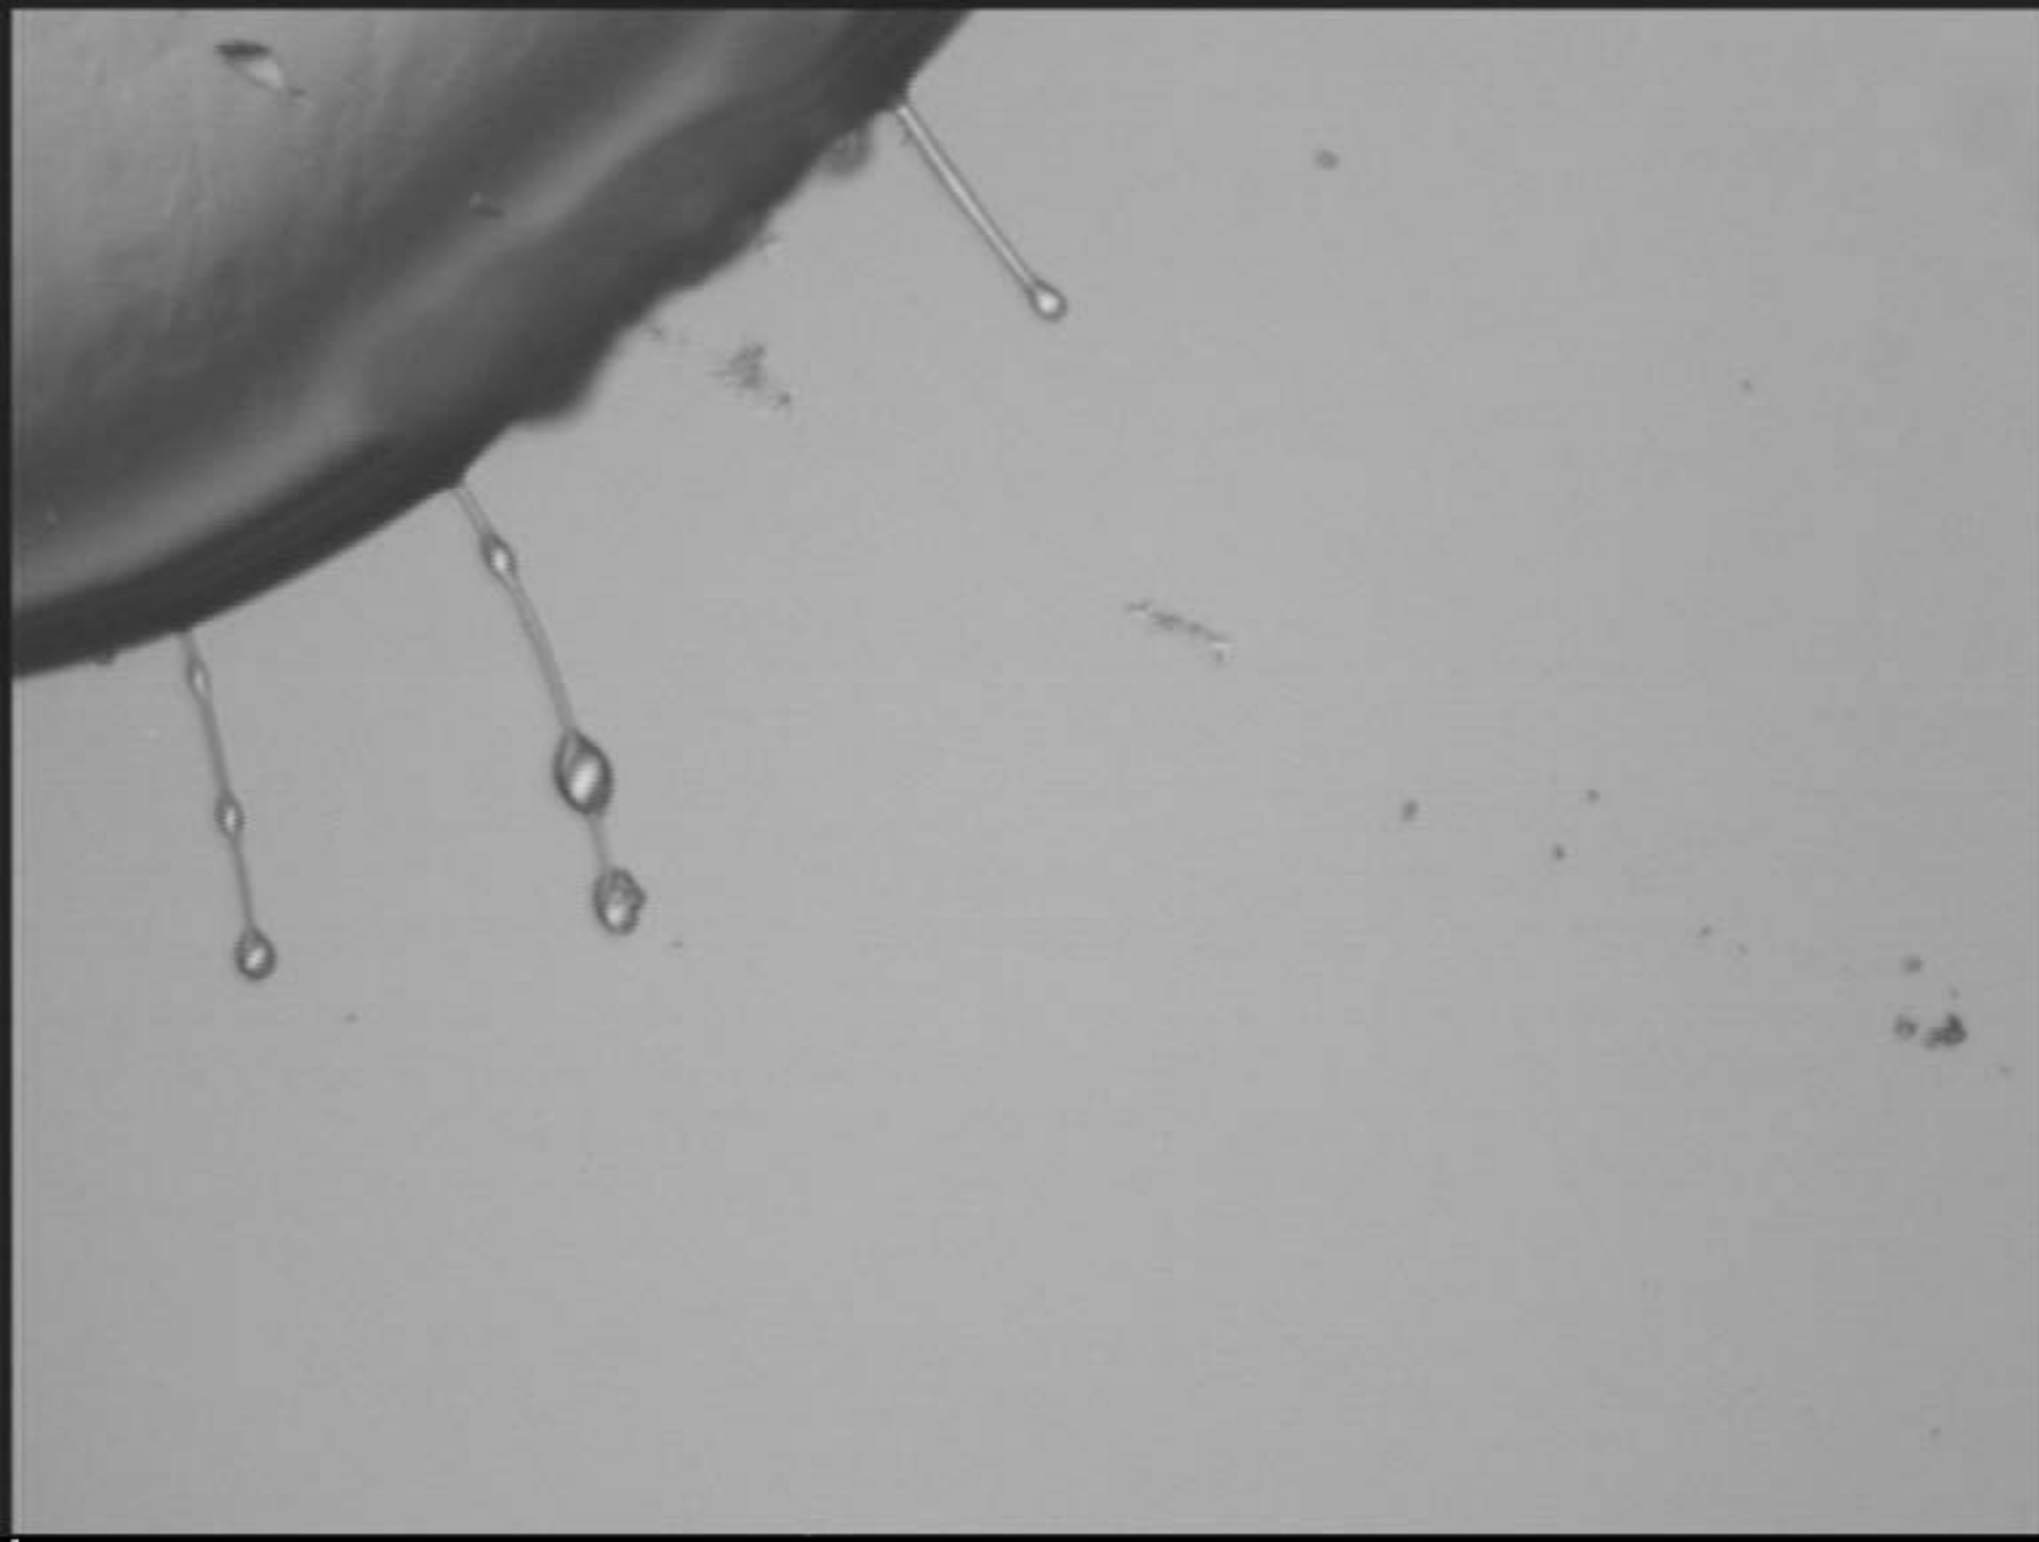

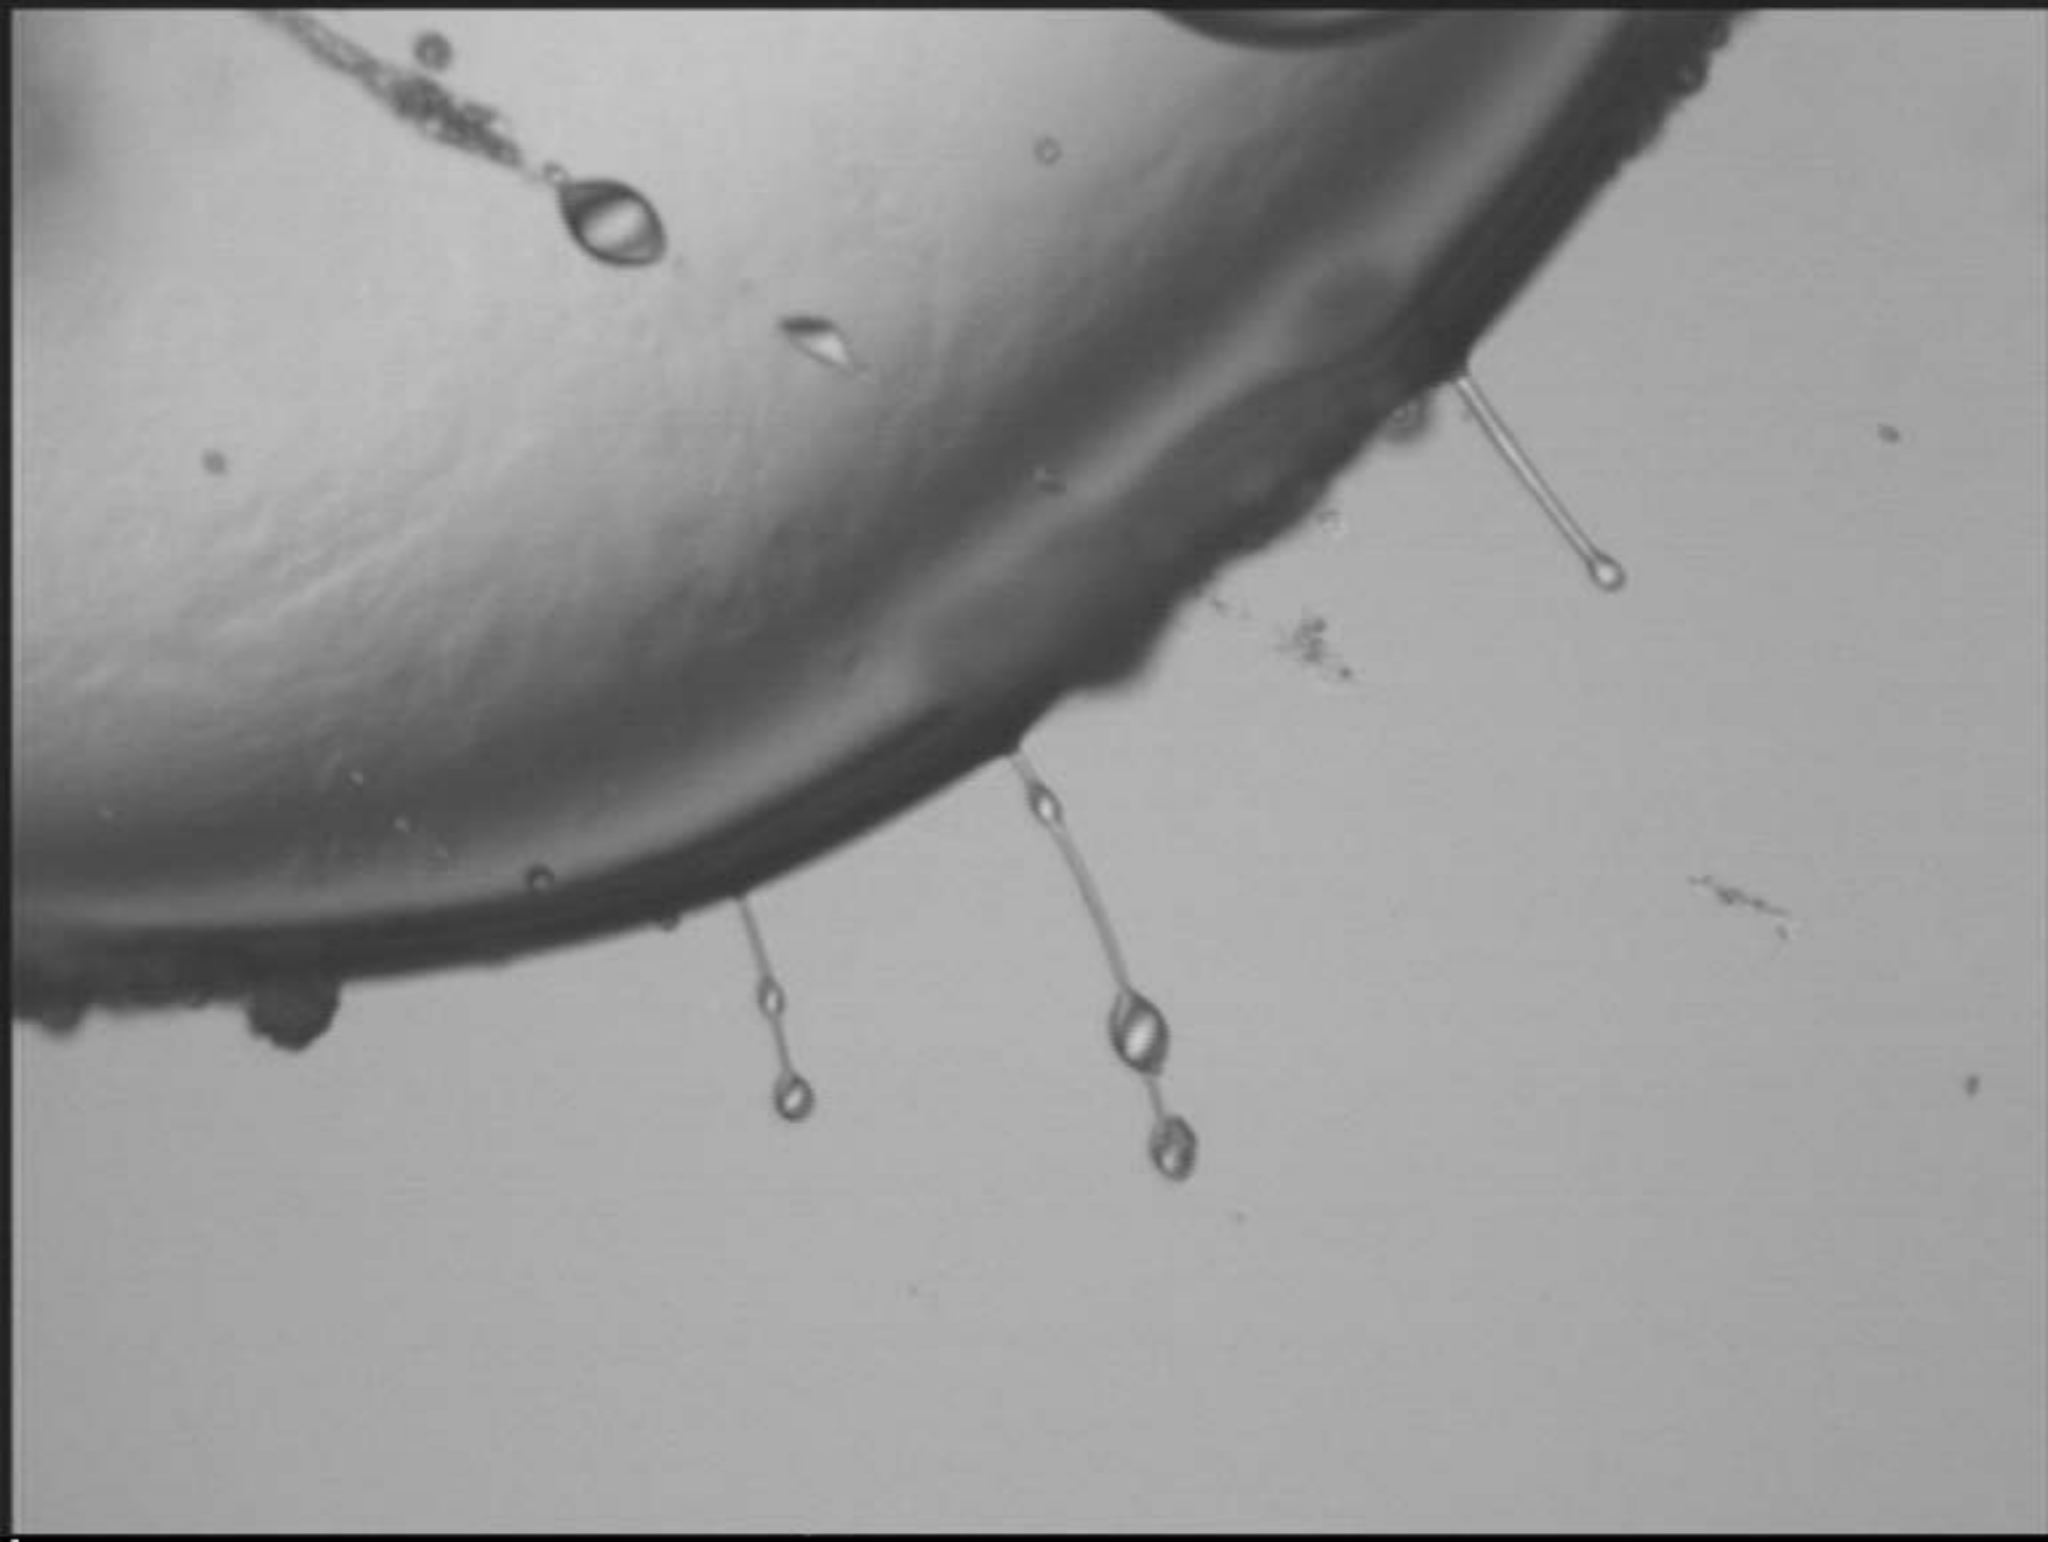

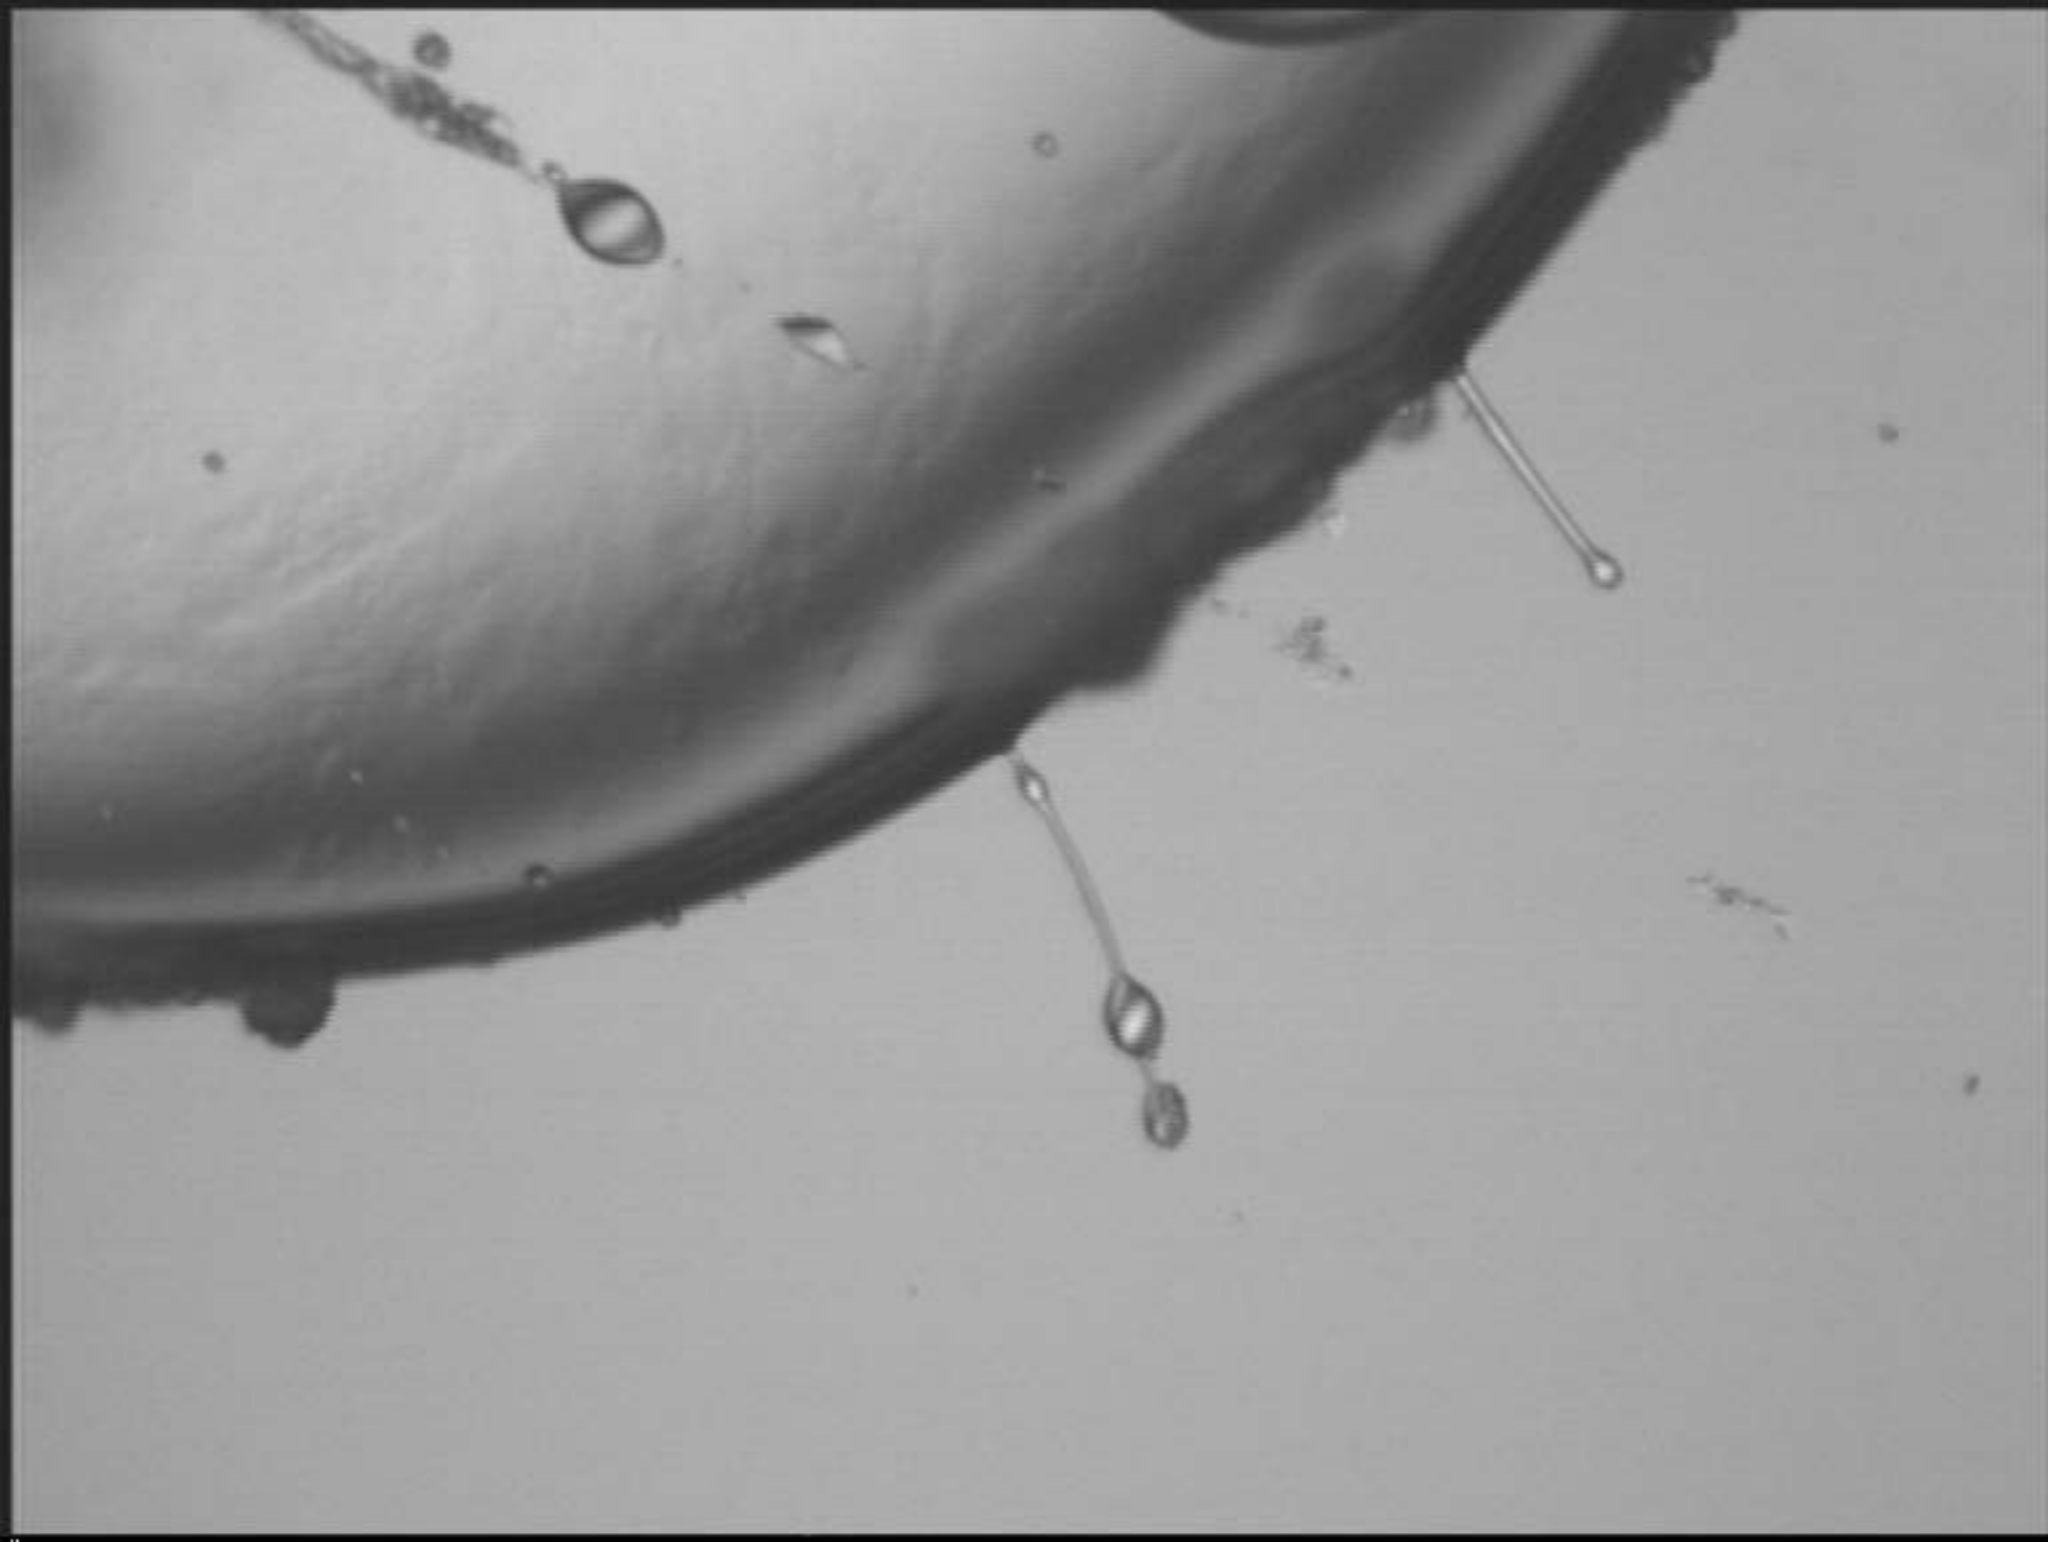

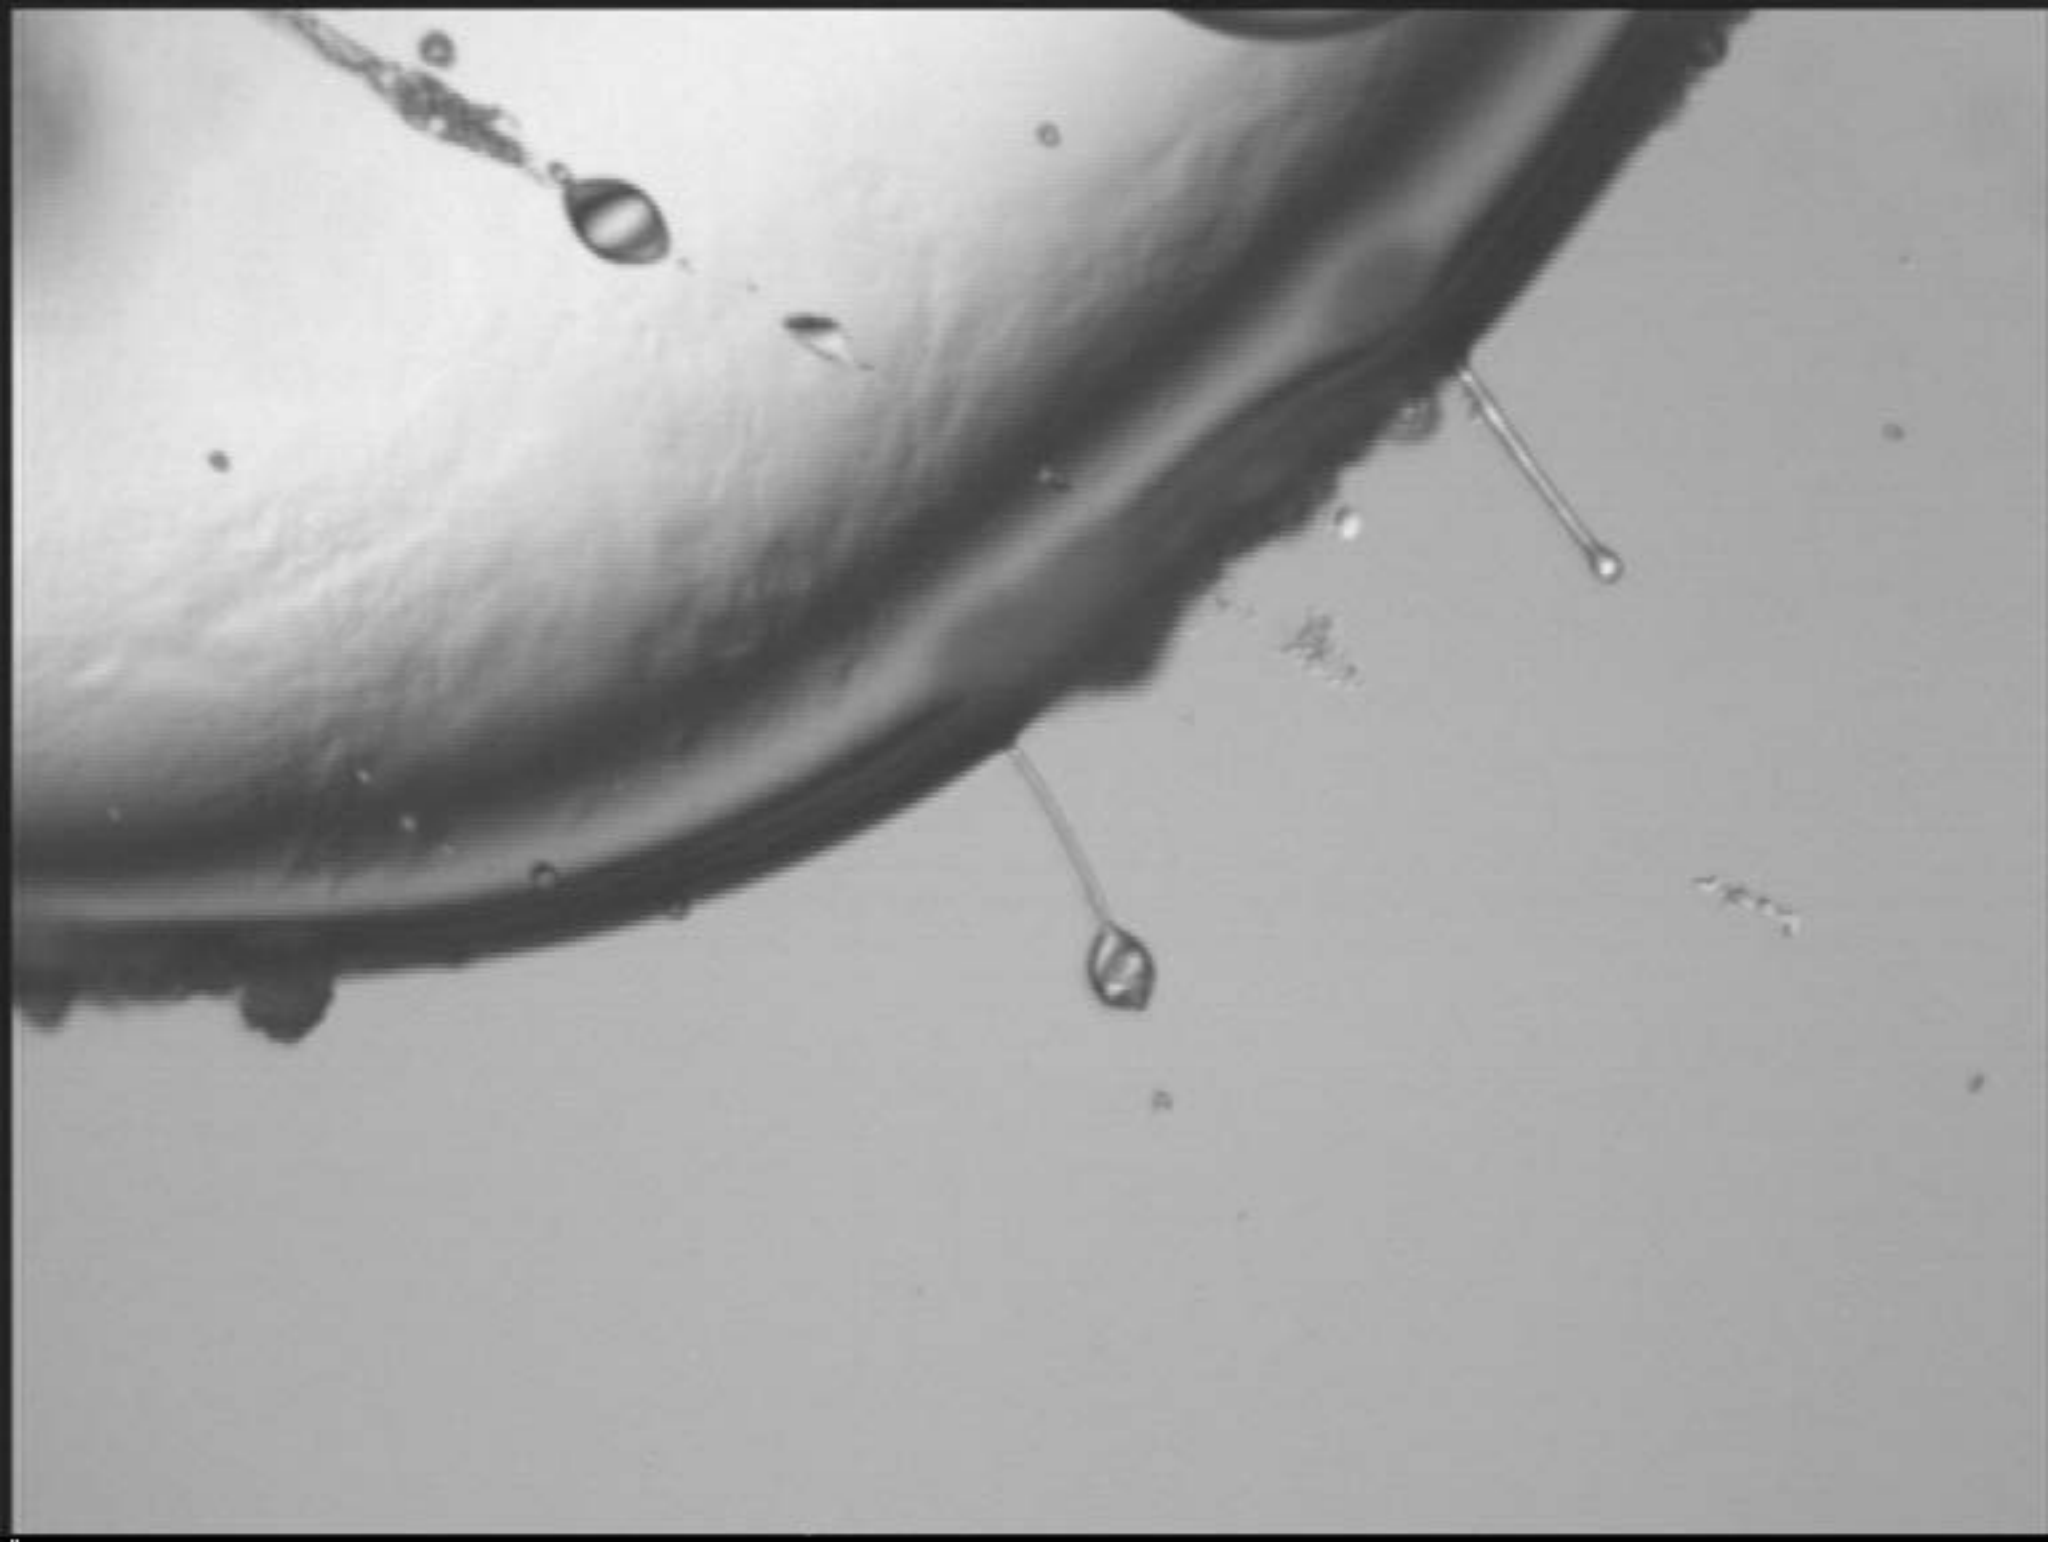

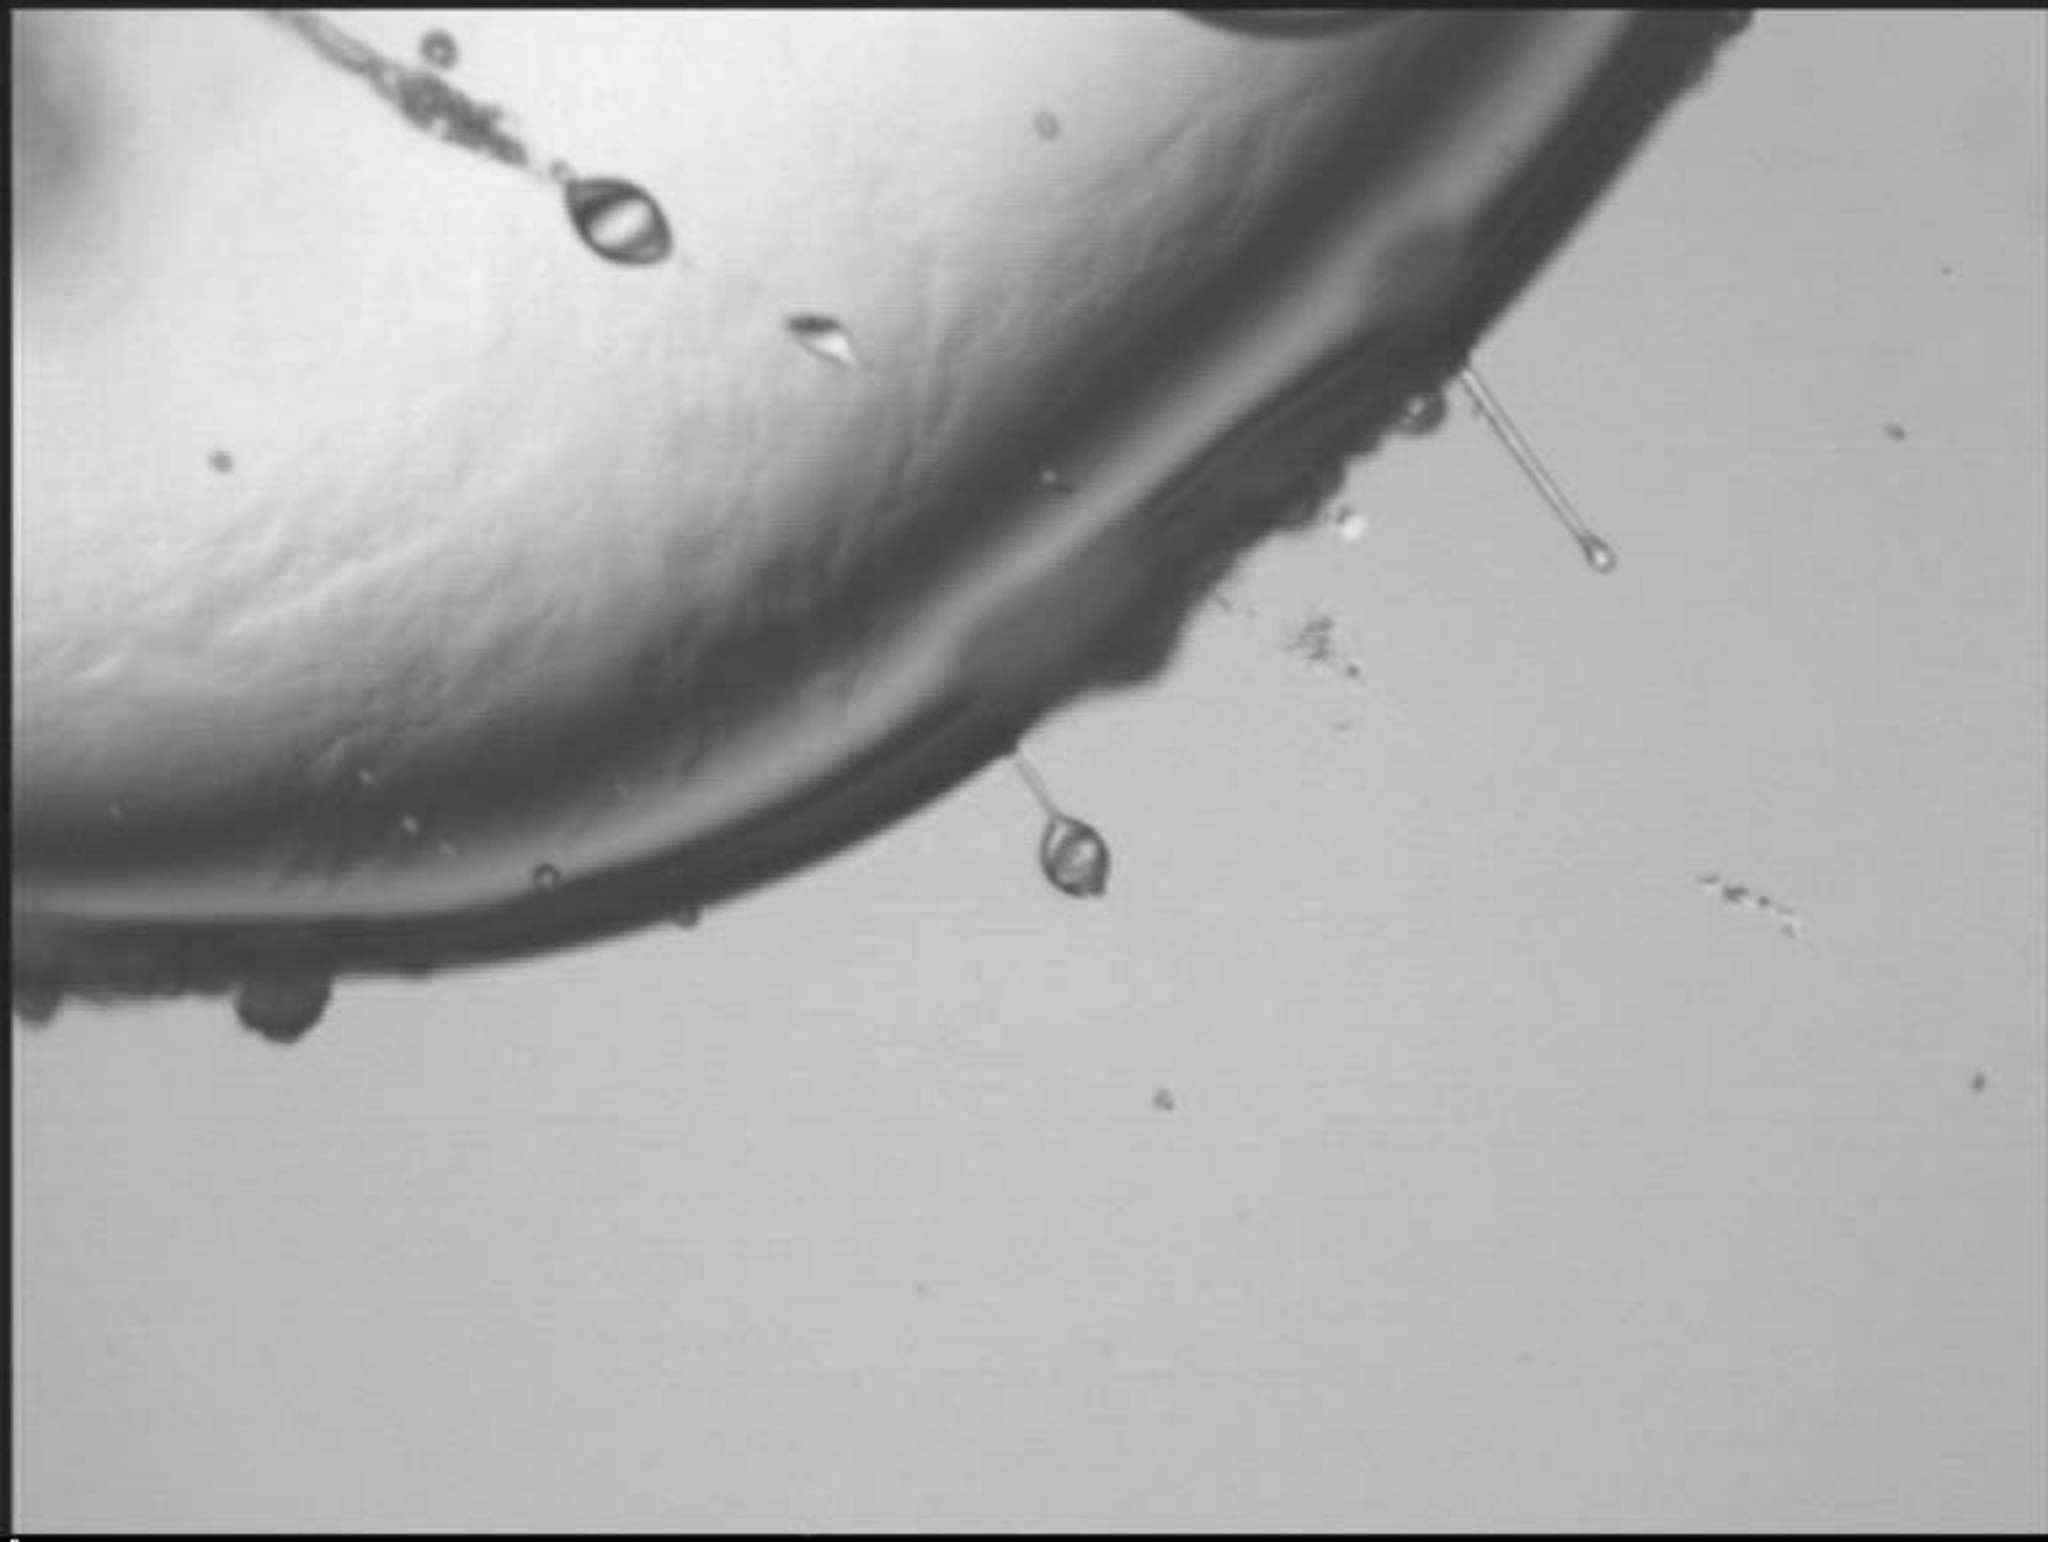



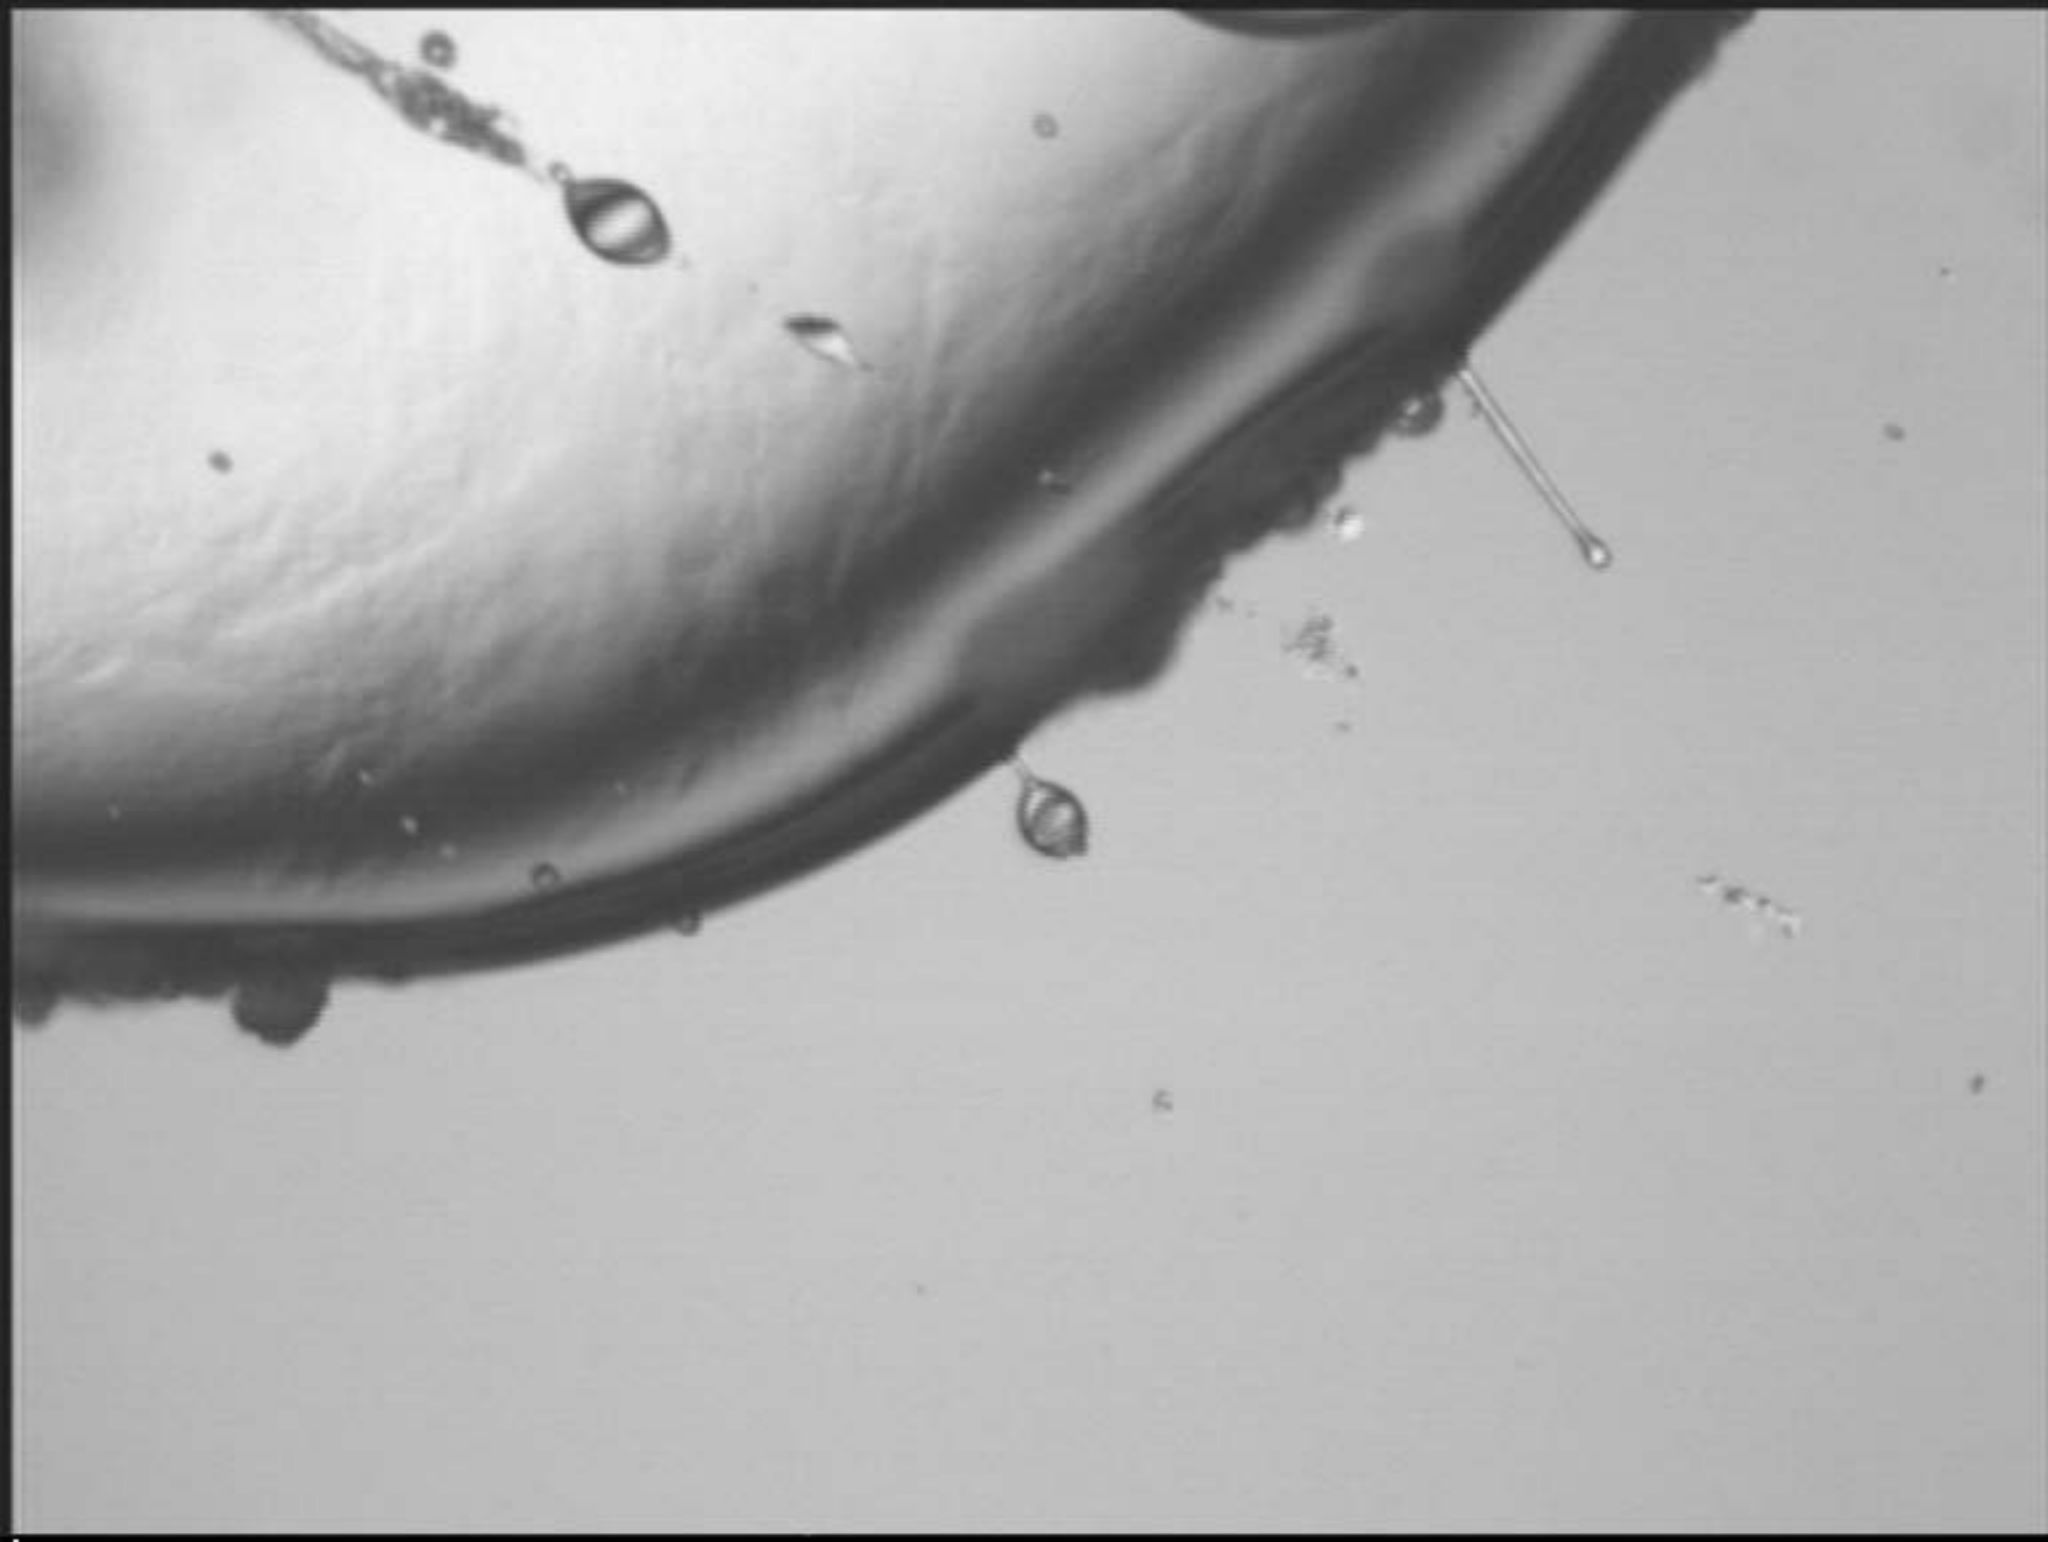

Supplement: c4sm01579g1.pdf [file c4sm01579g1.pdf]
