# Supplementary figures and images for: Wetting-mediated collective tubulation and pearling in confined vesicular drops of DDAB solutions
Source: Royal Society of Chemistry journal article supplement (doi:10.1039/c4sm01579g), 2014-01-01

Stack Image Sequence S2:  
from t ~ 0s to ~1h18min  
image size: 1074  $\mu\text{m}$ x879  $\mu\text{m}$

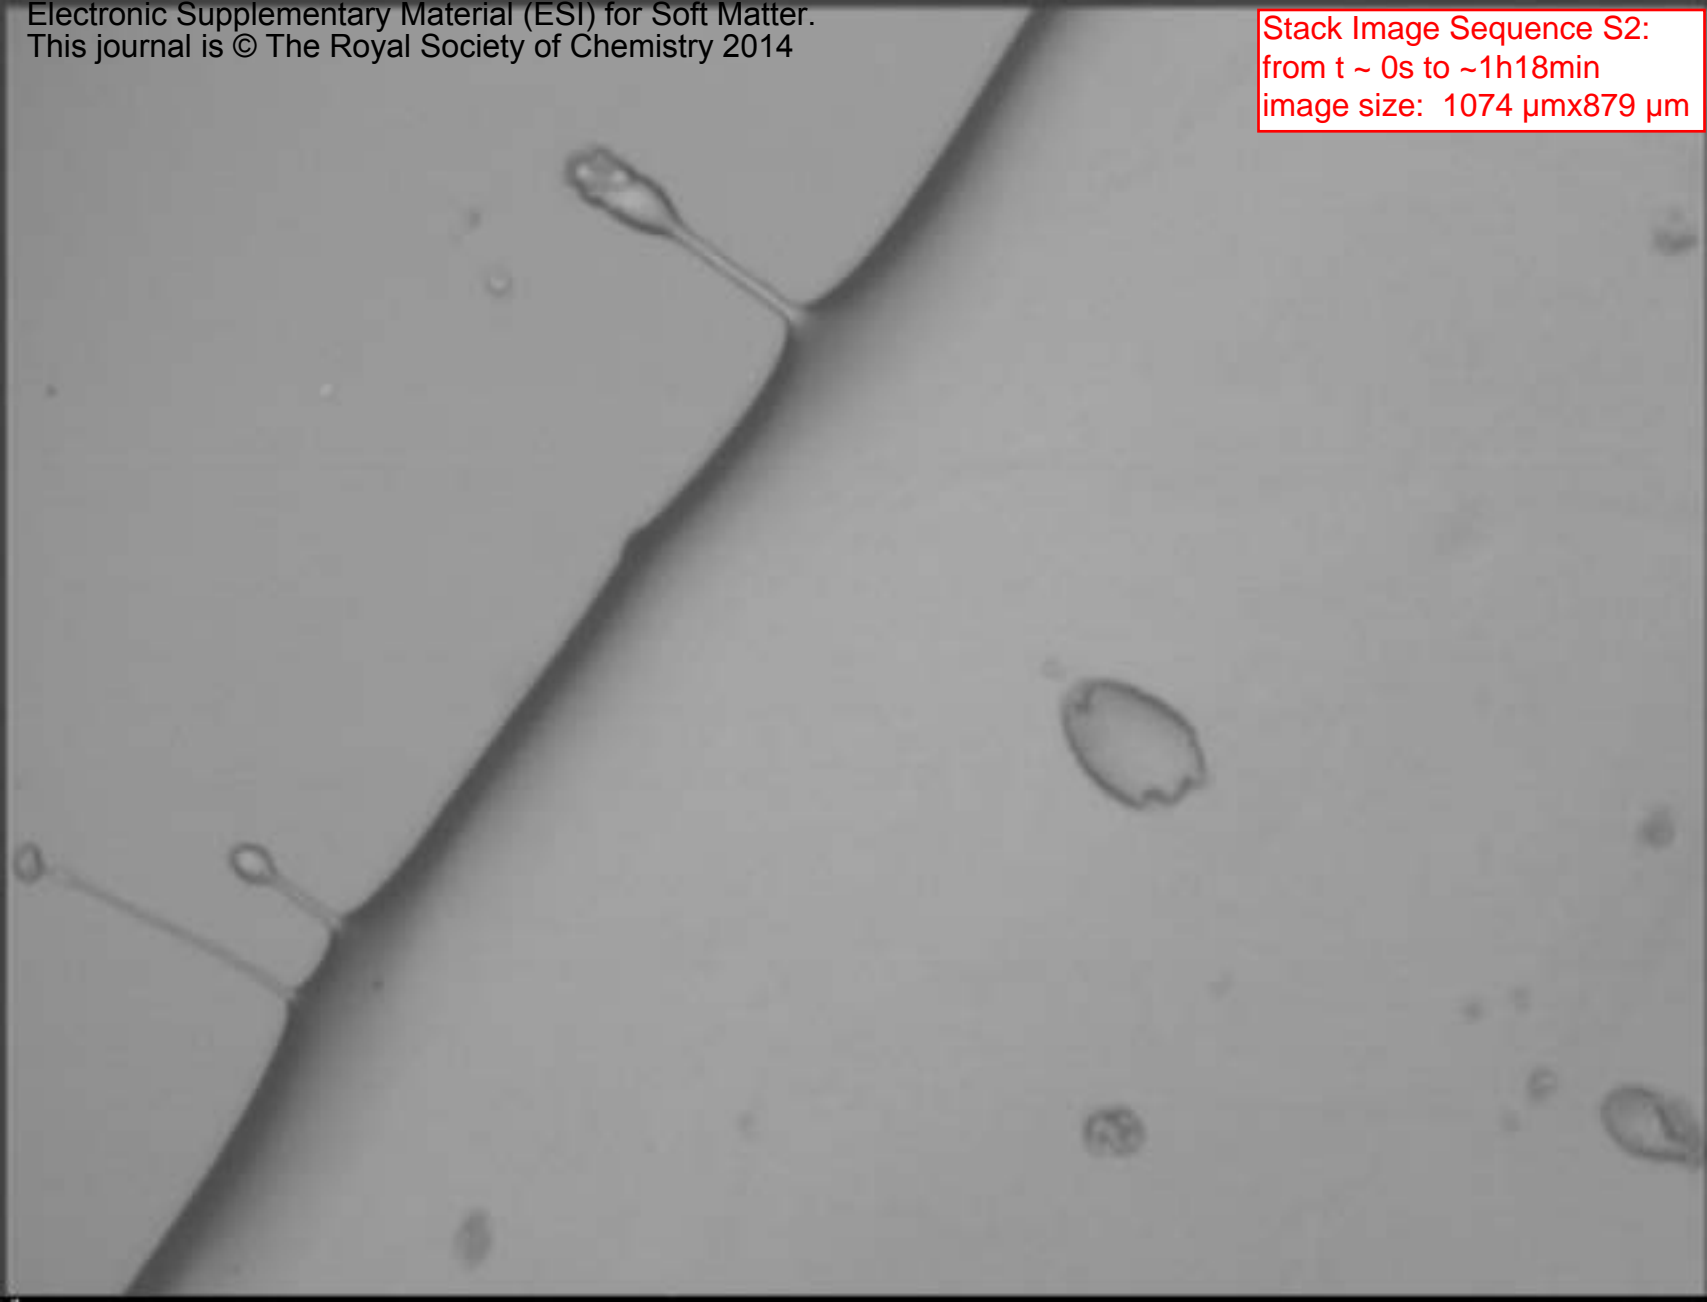

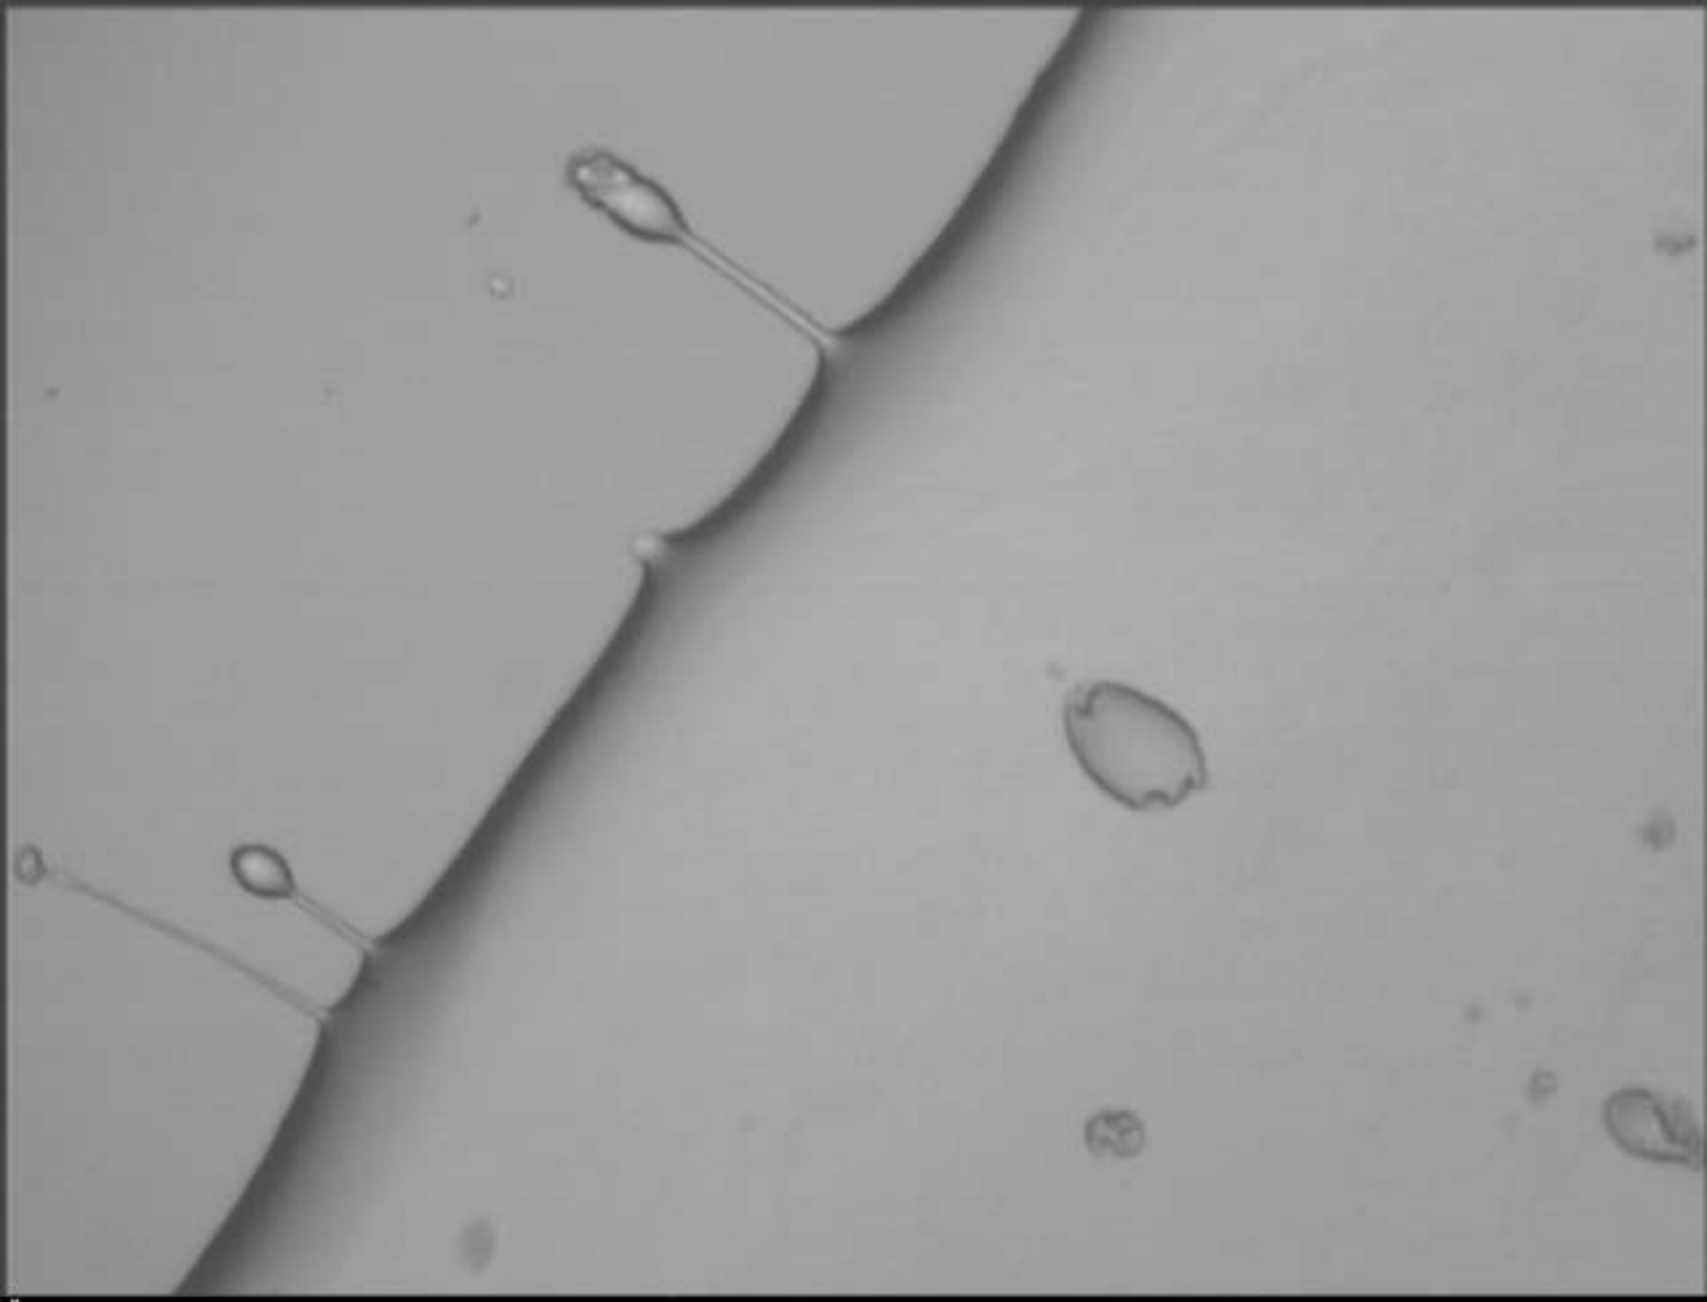

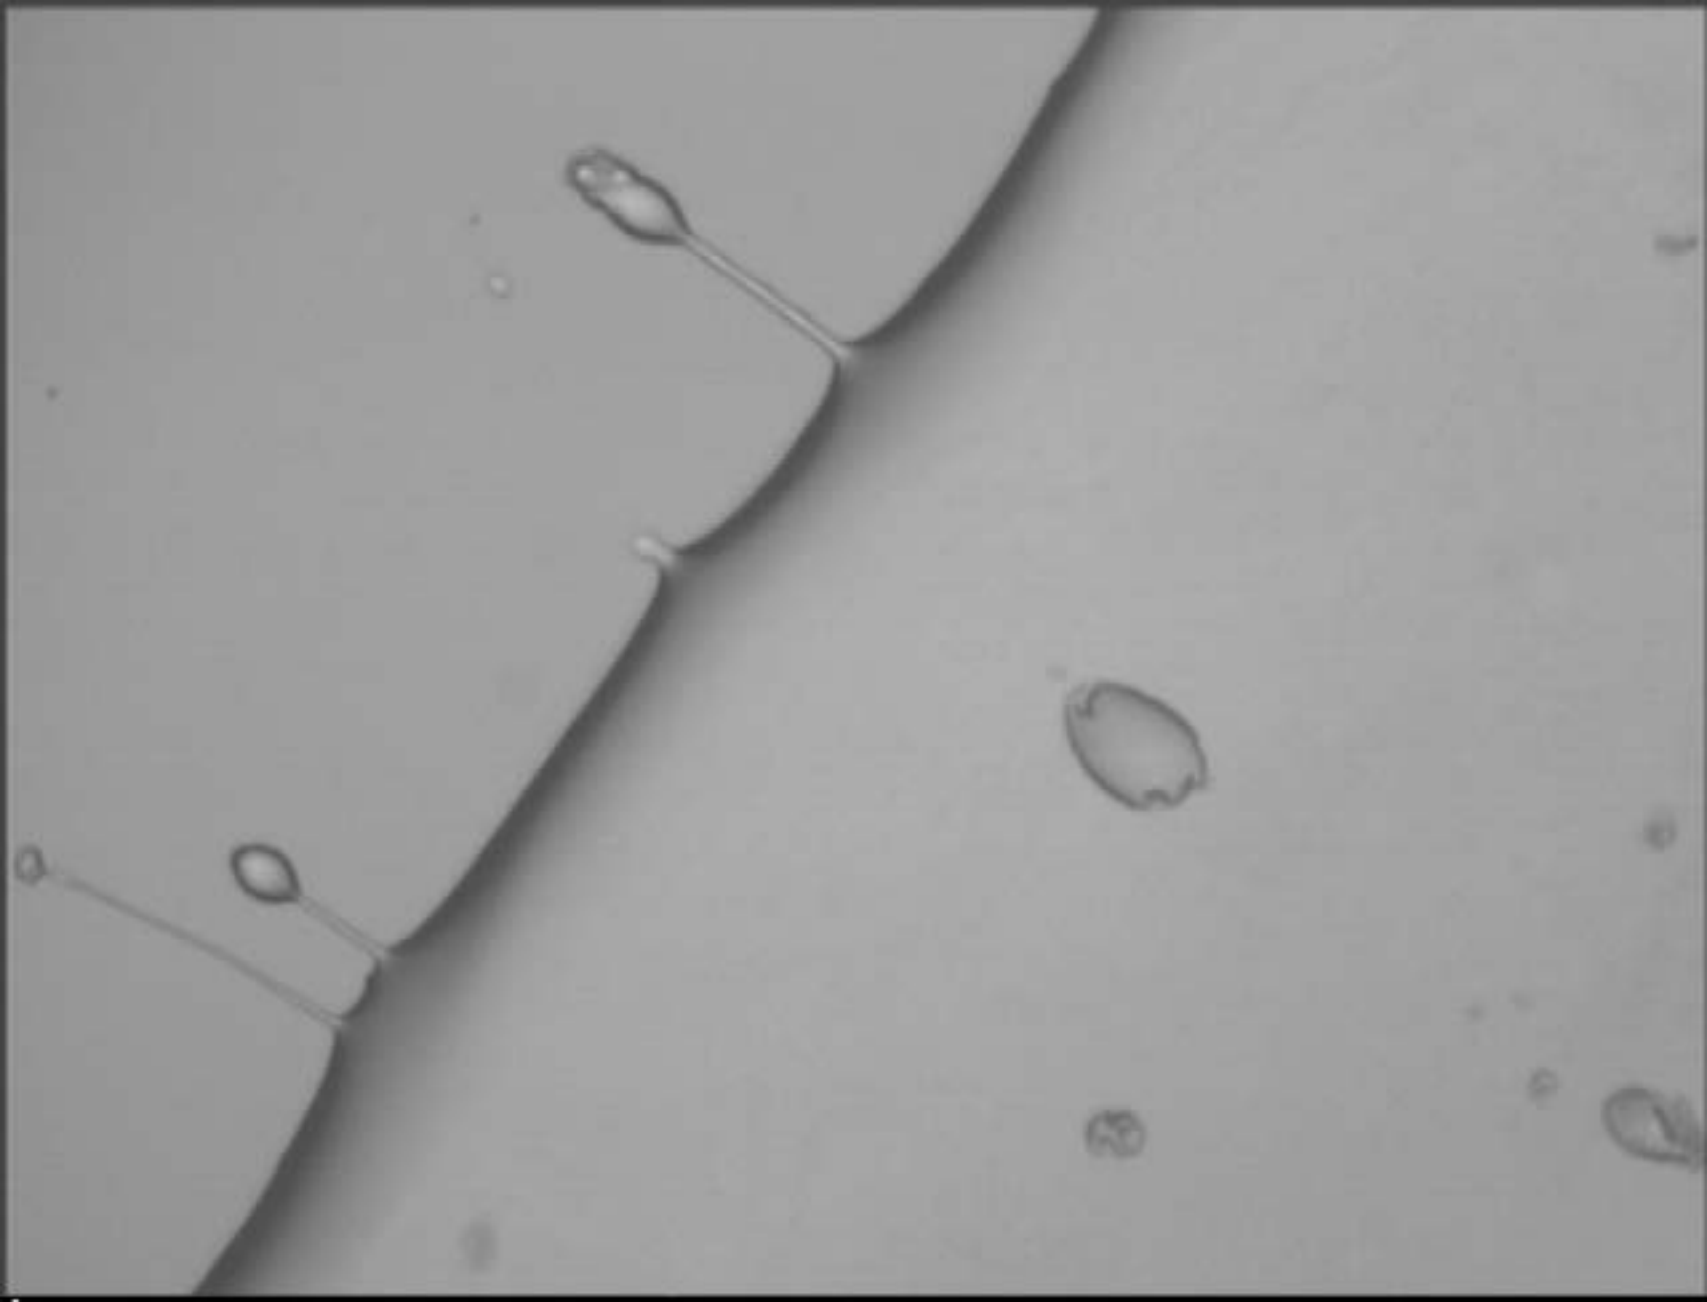

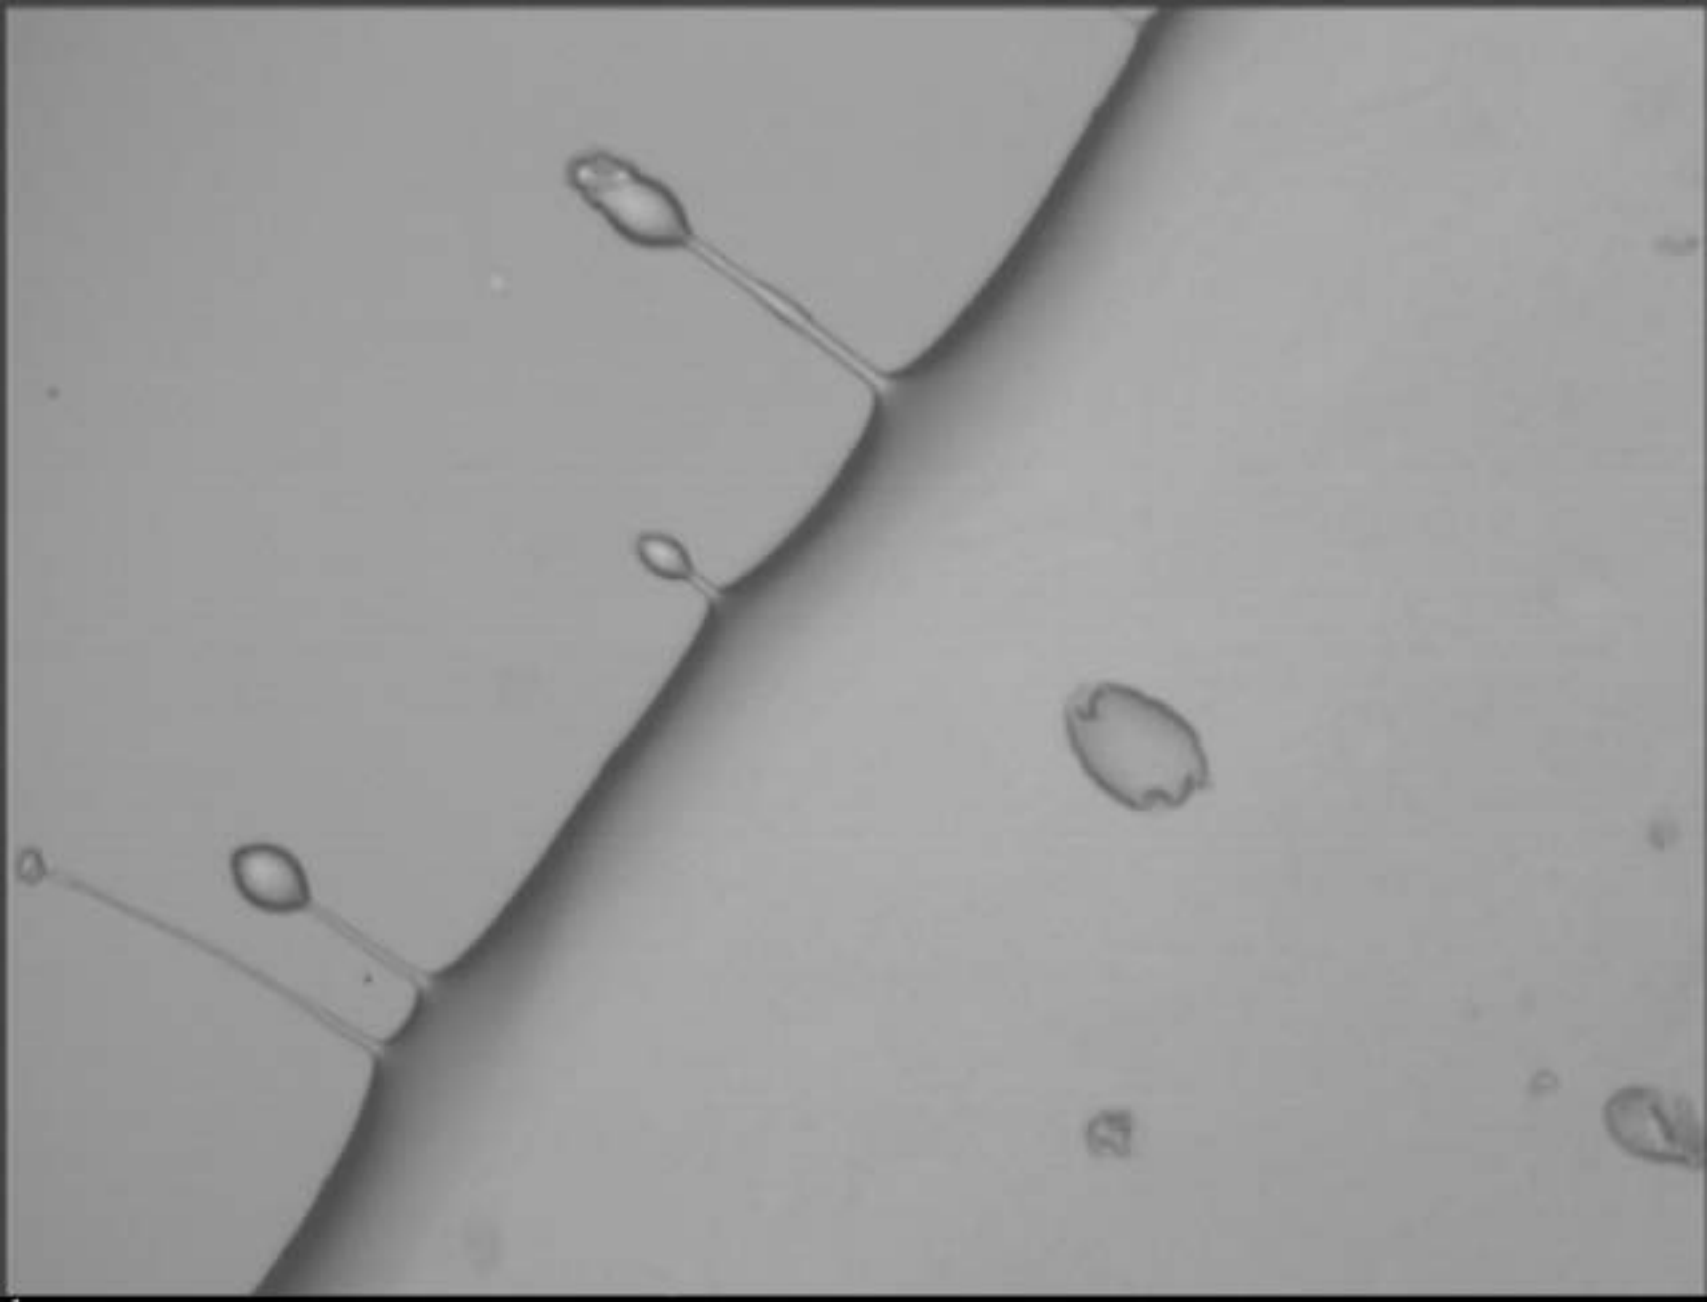

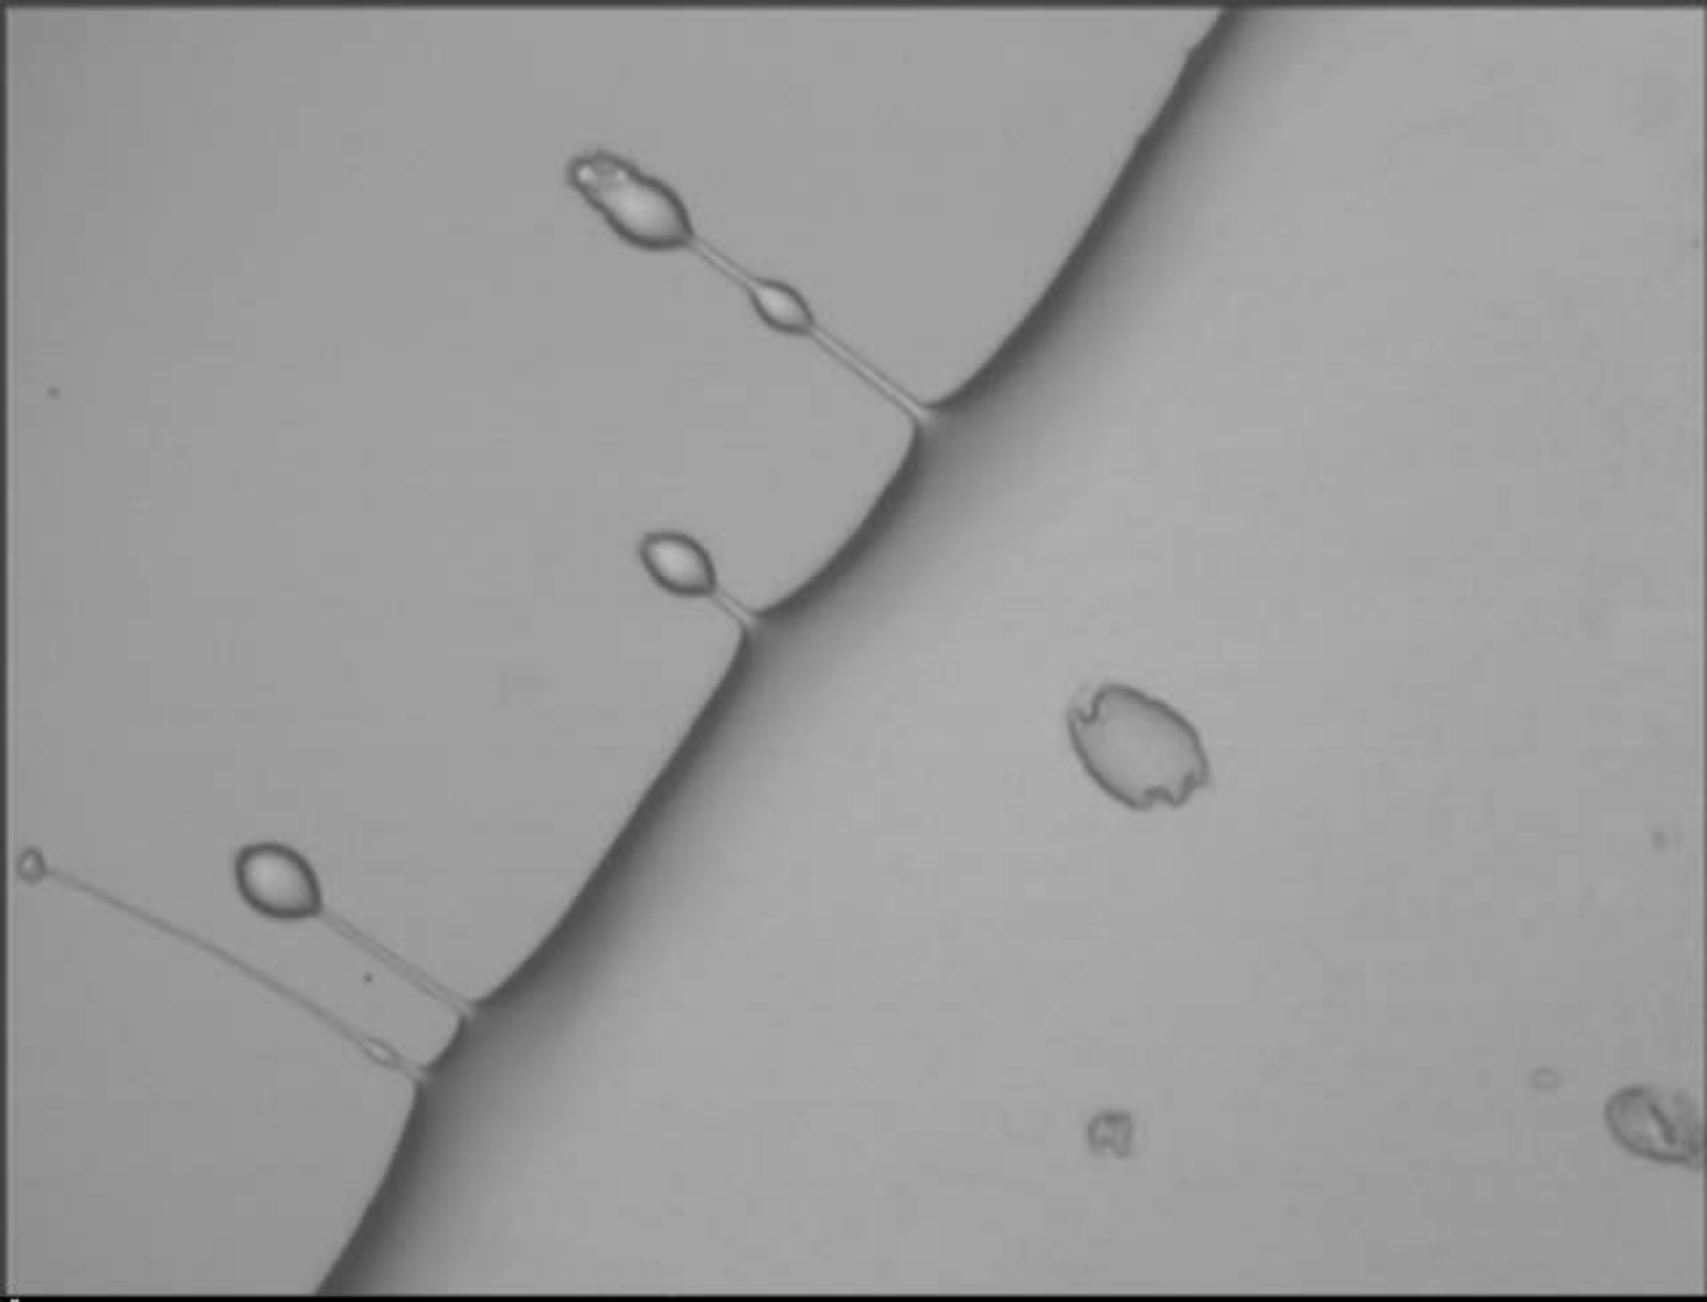

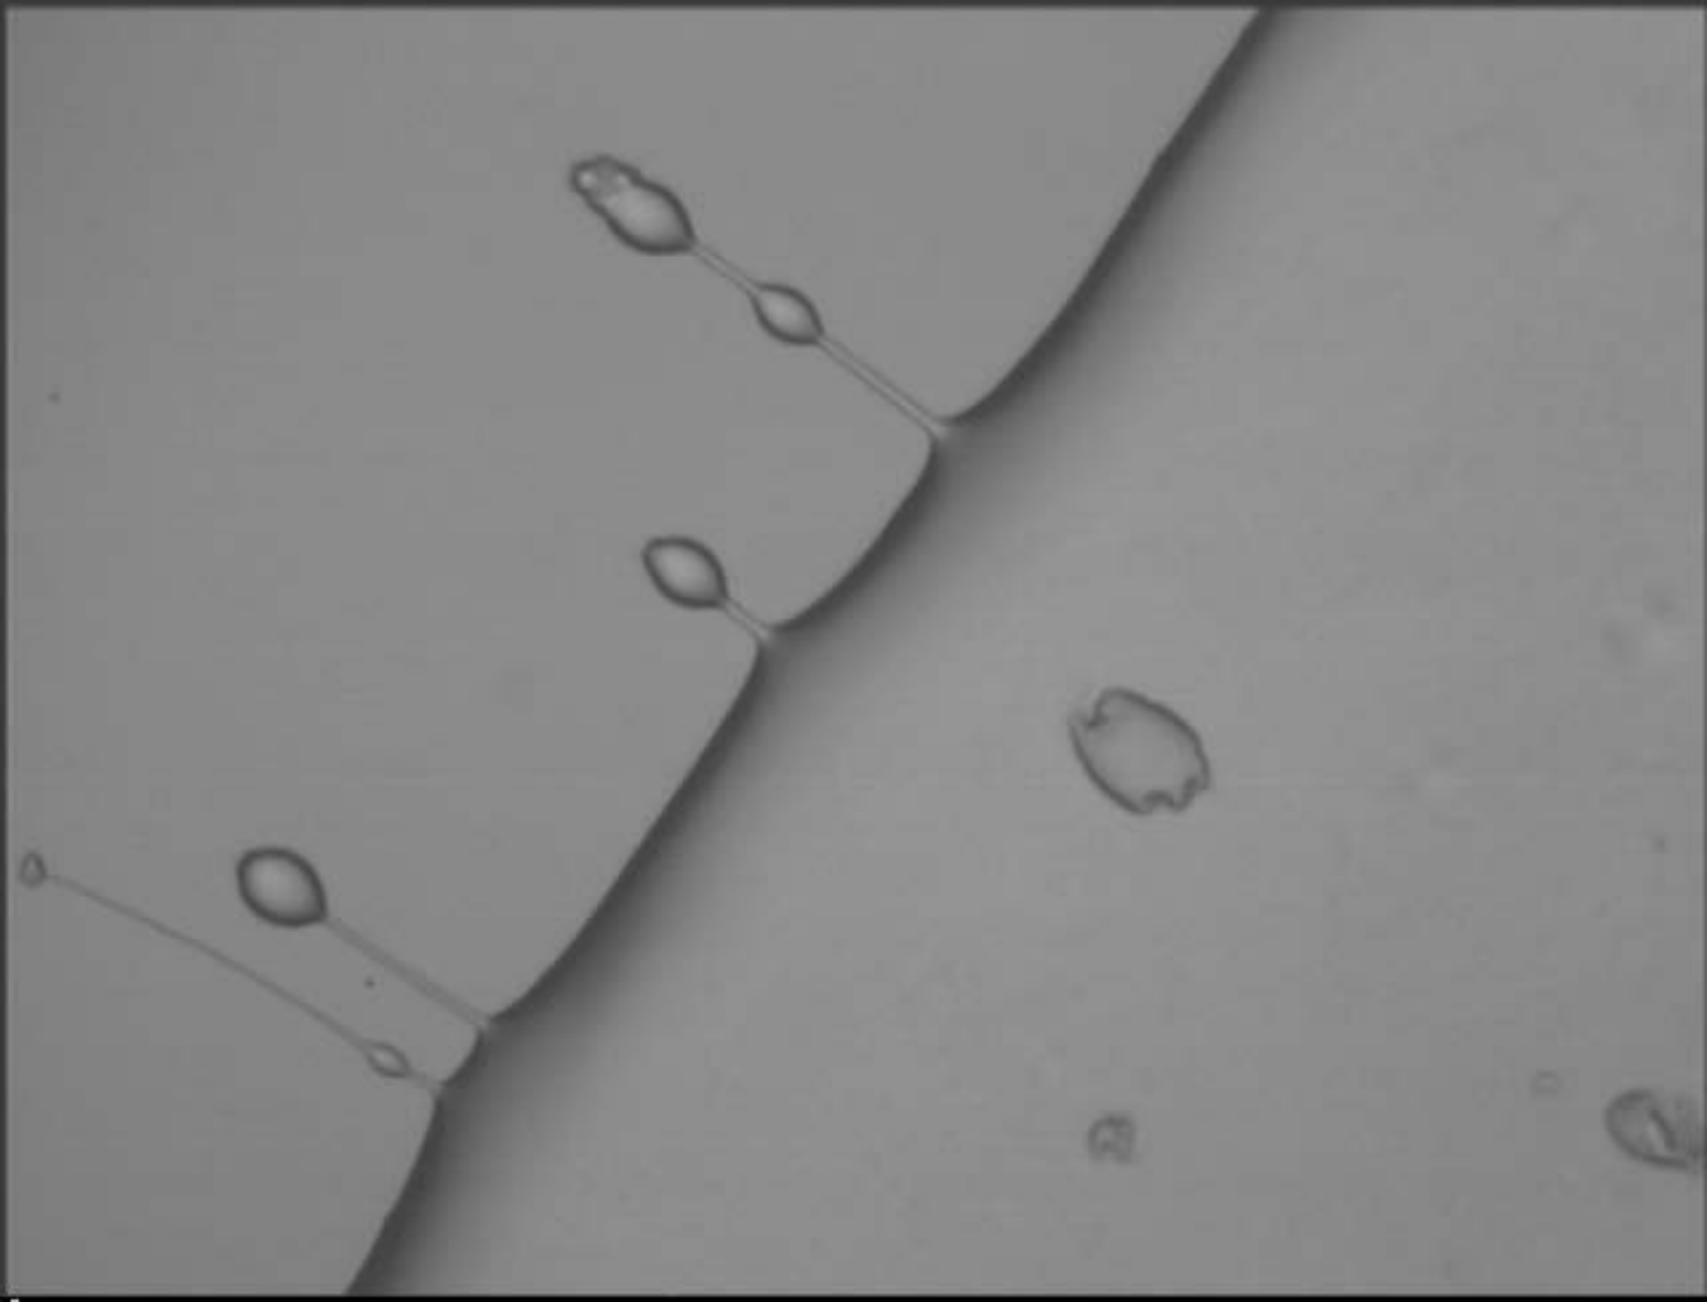

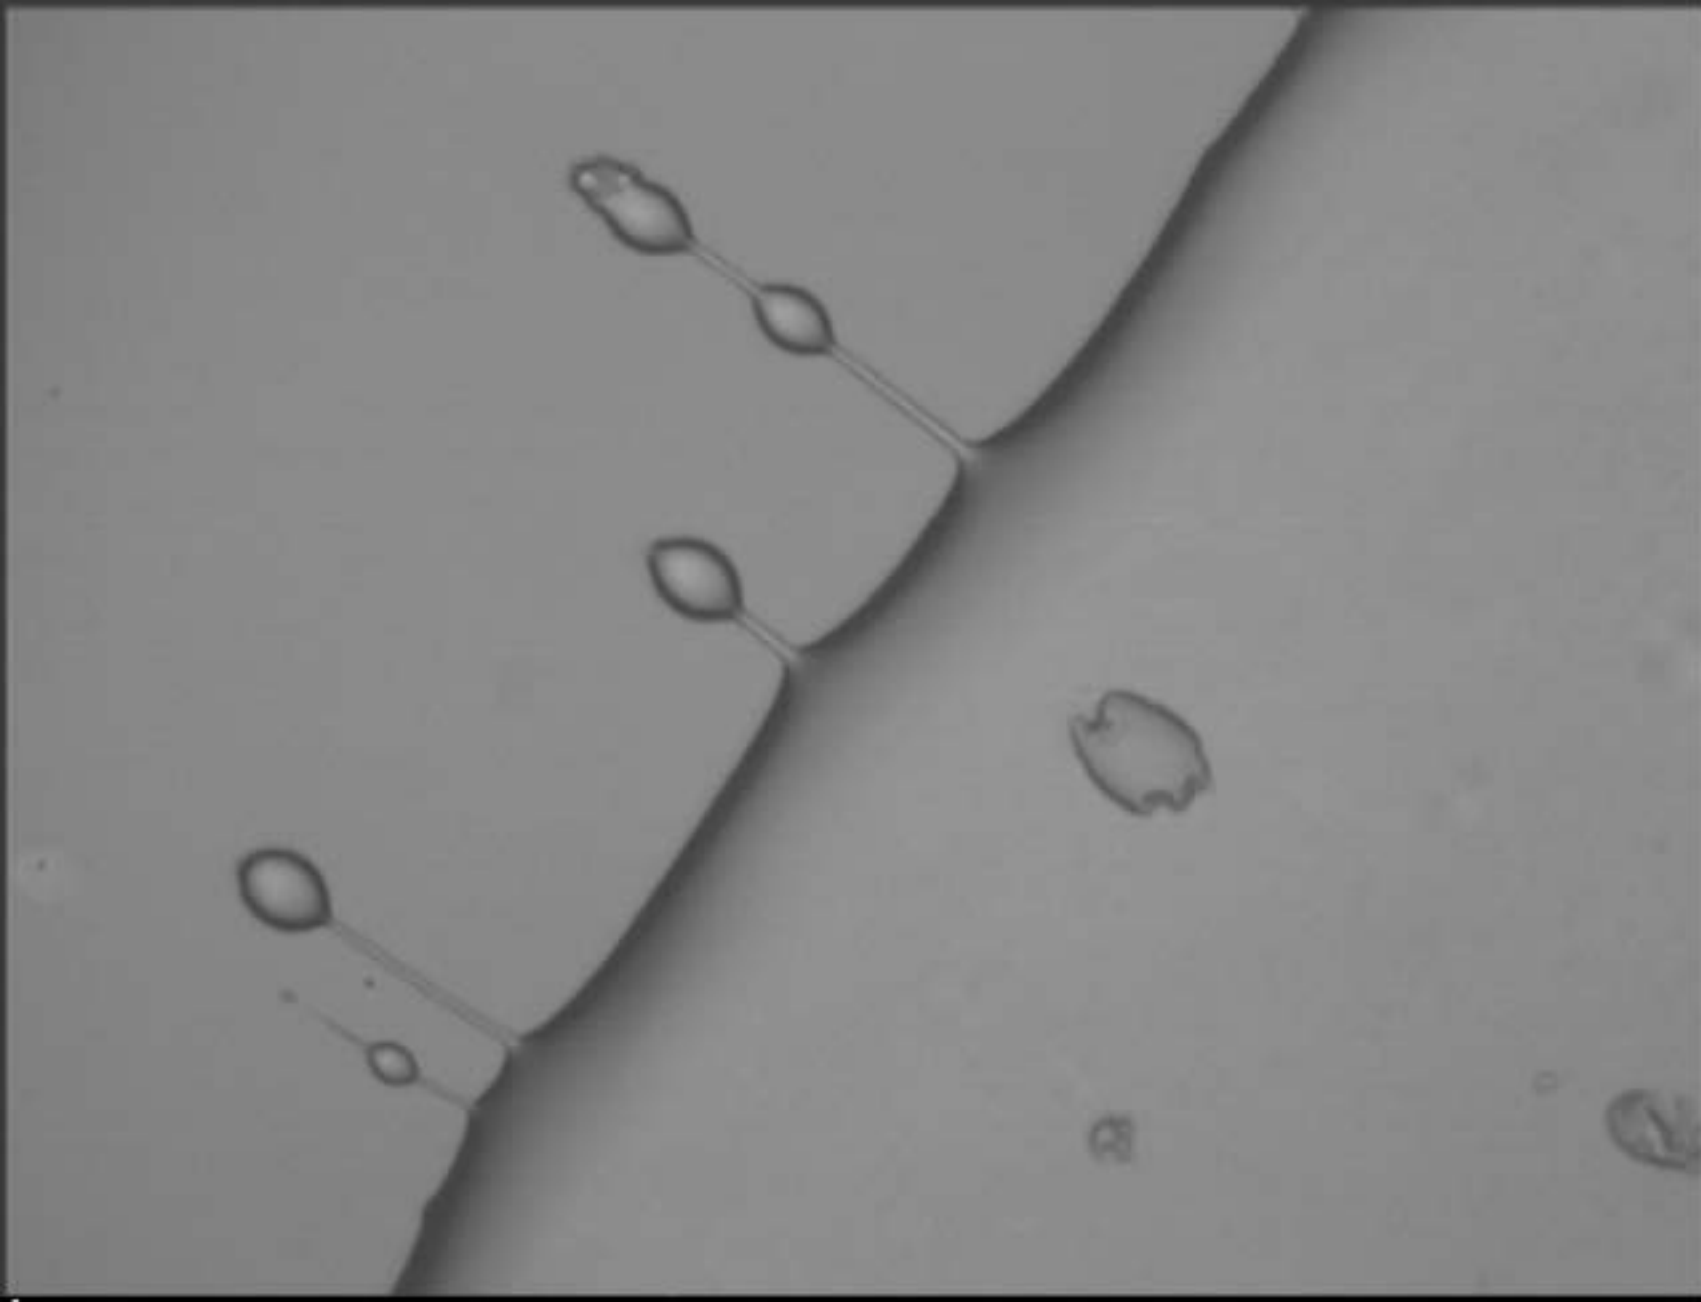

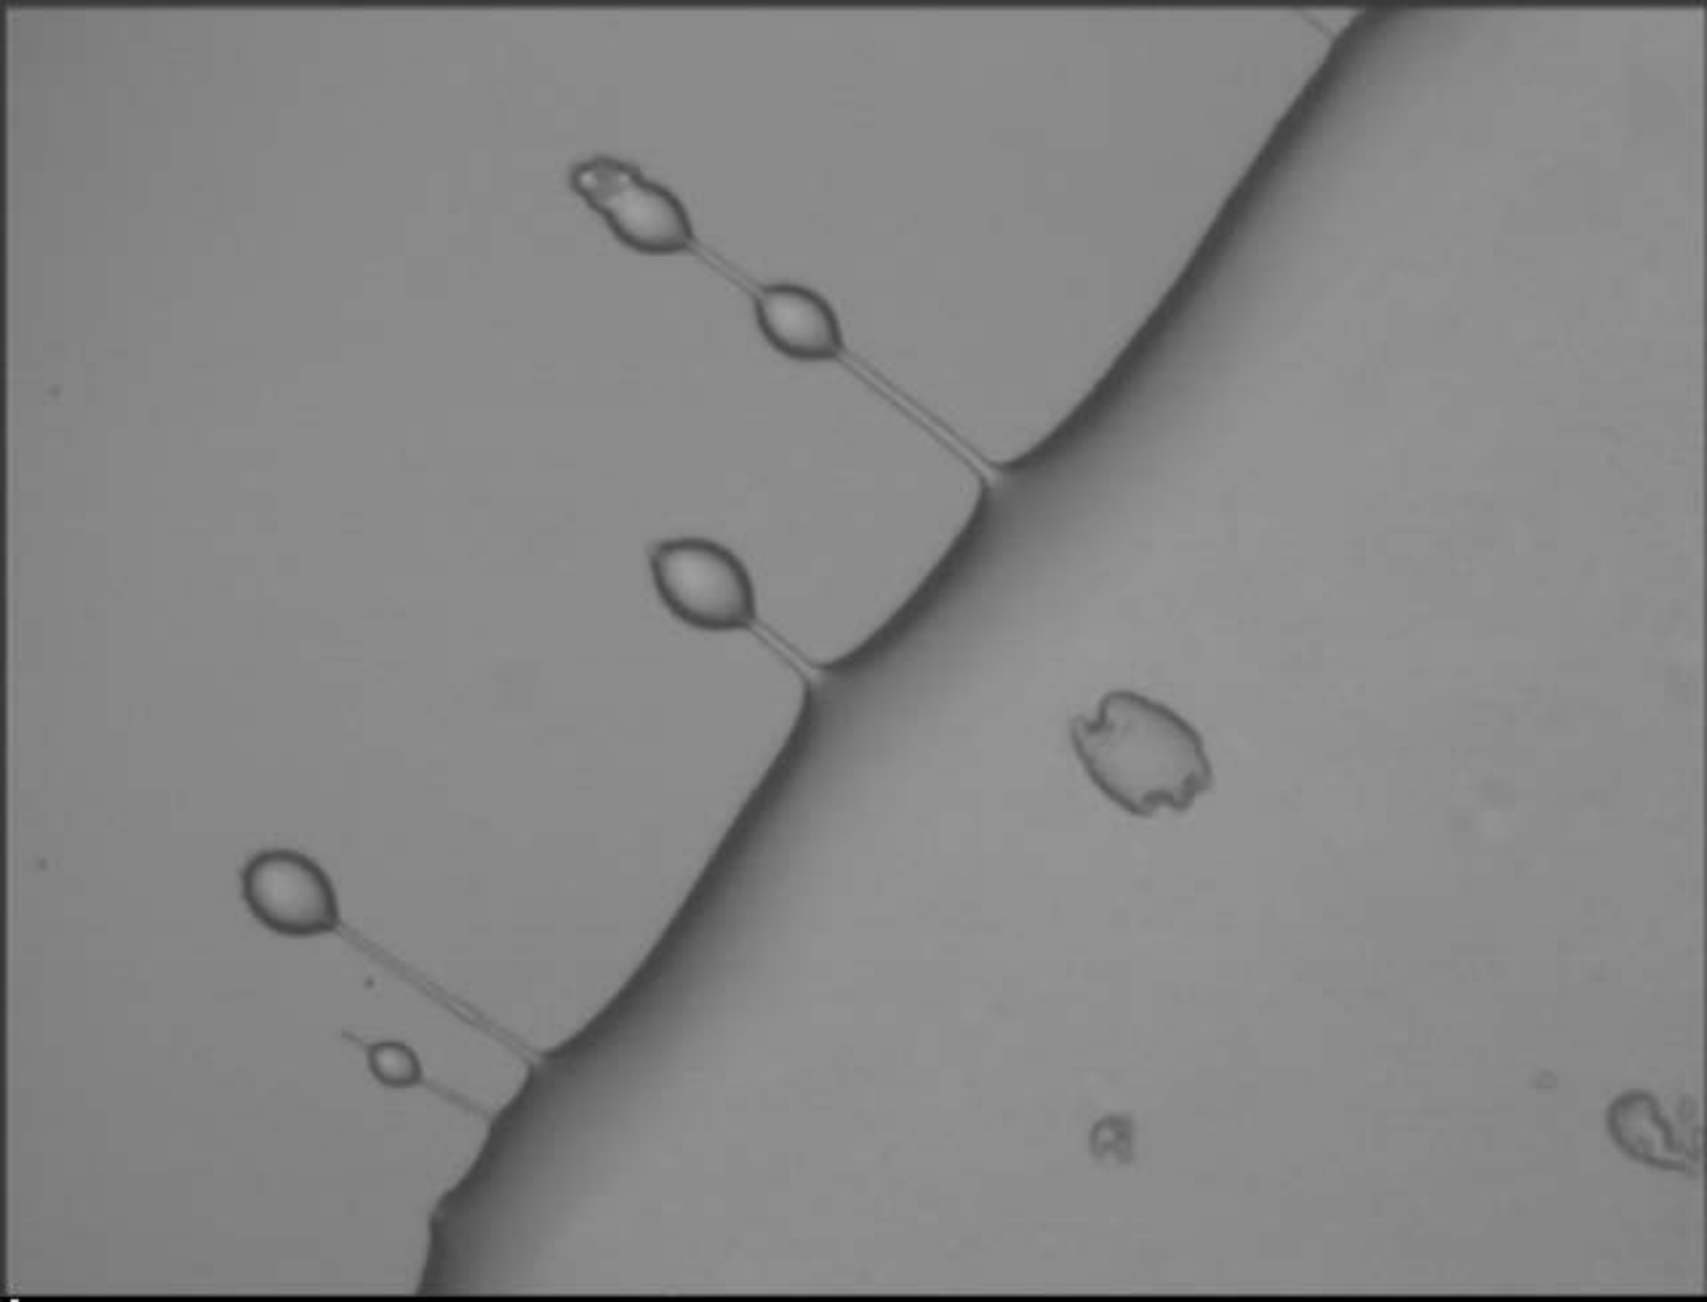



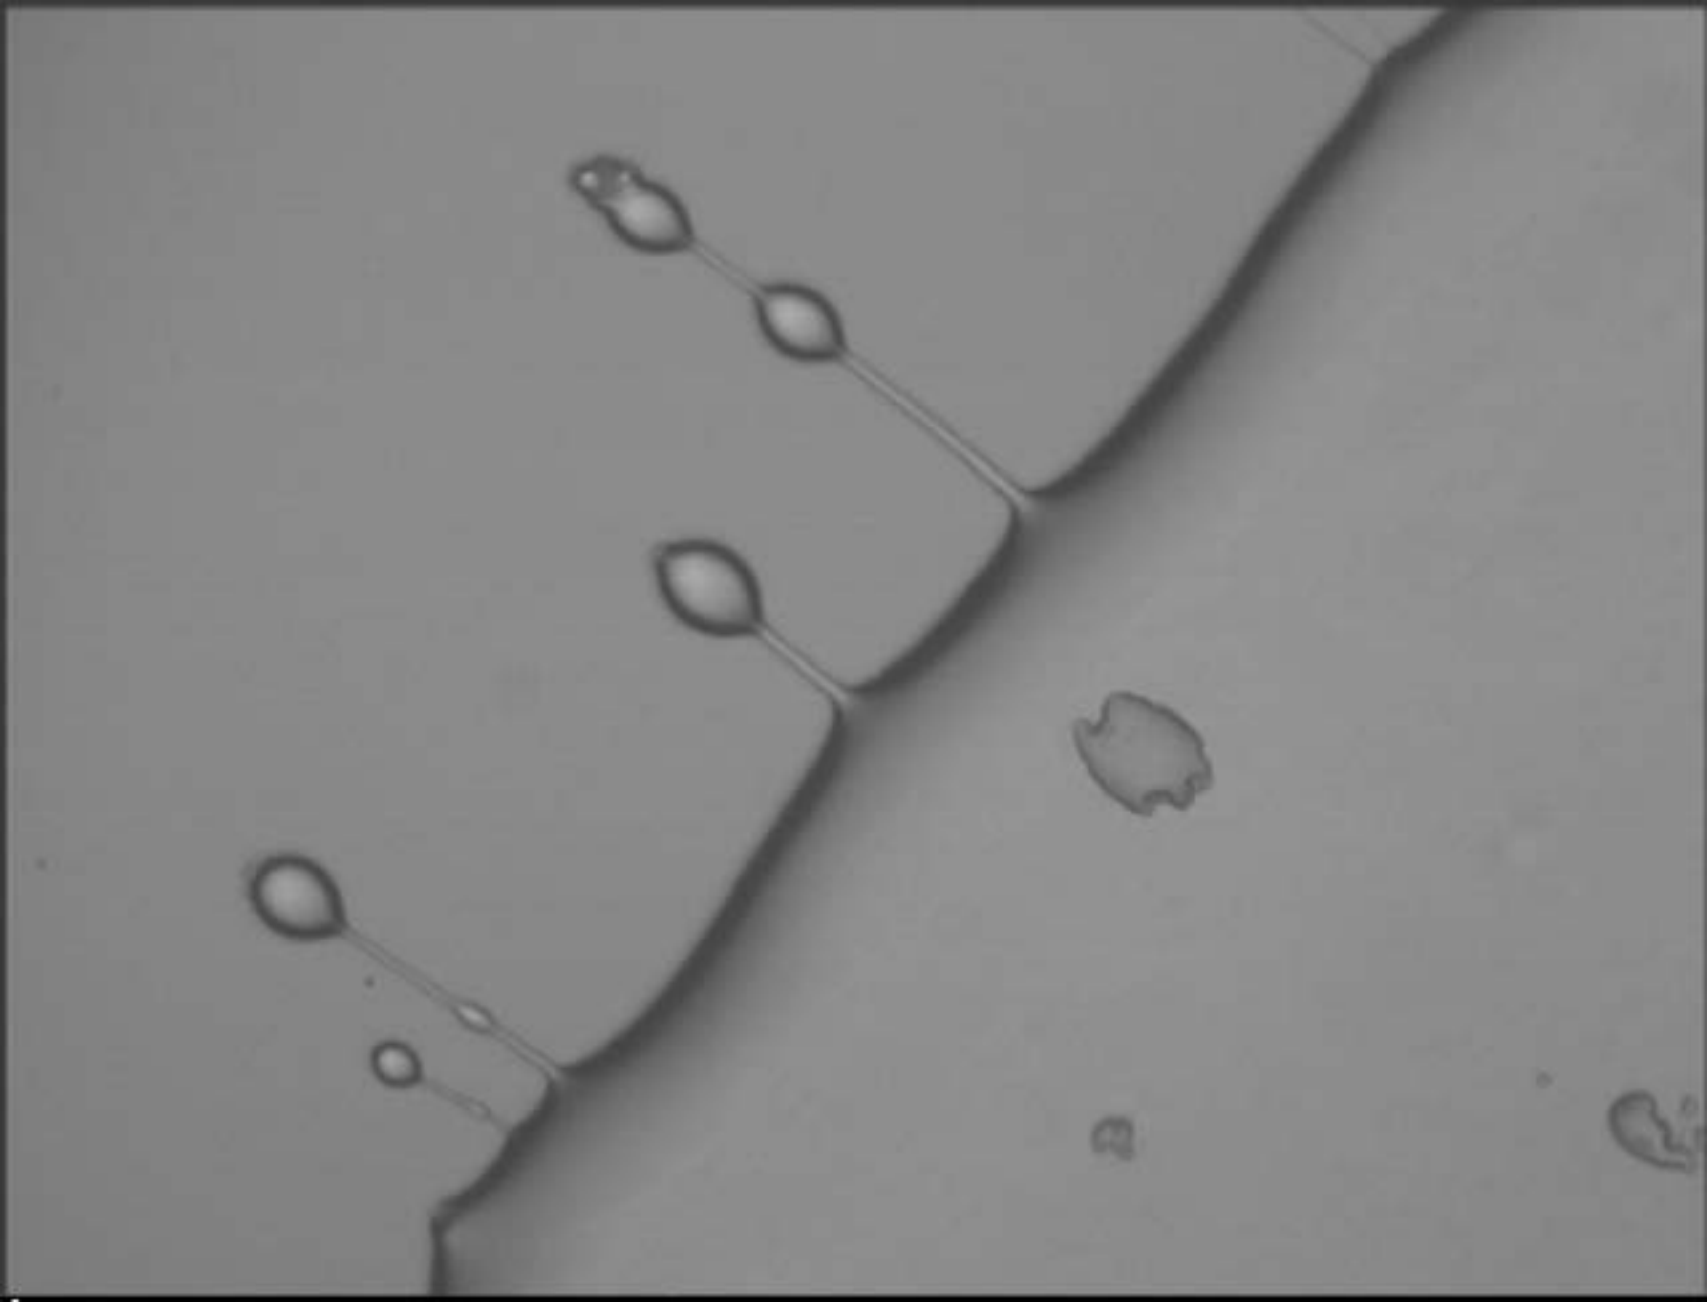

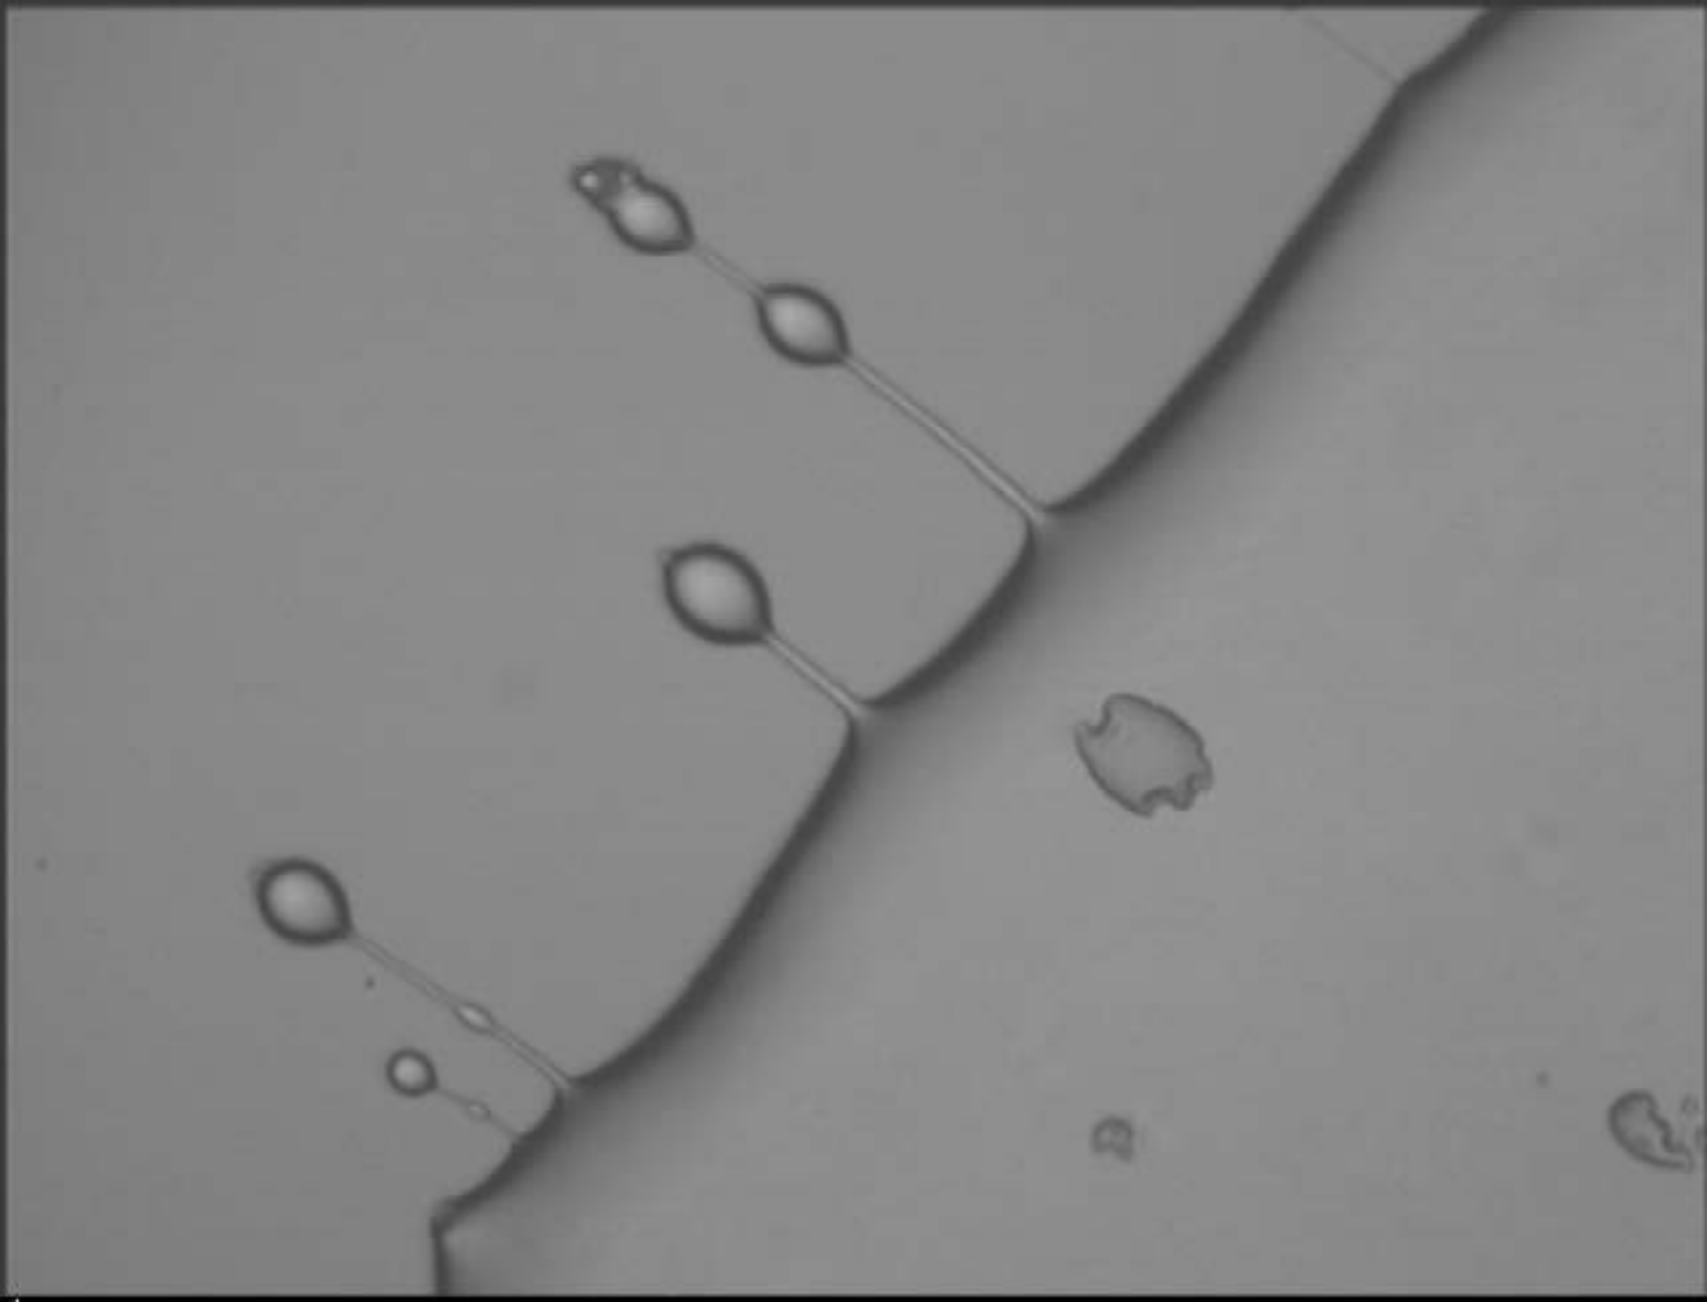

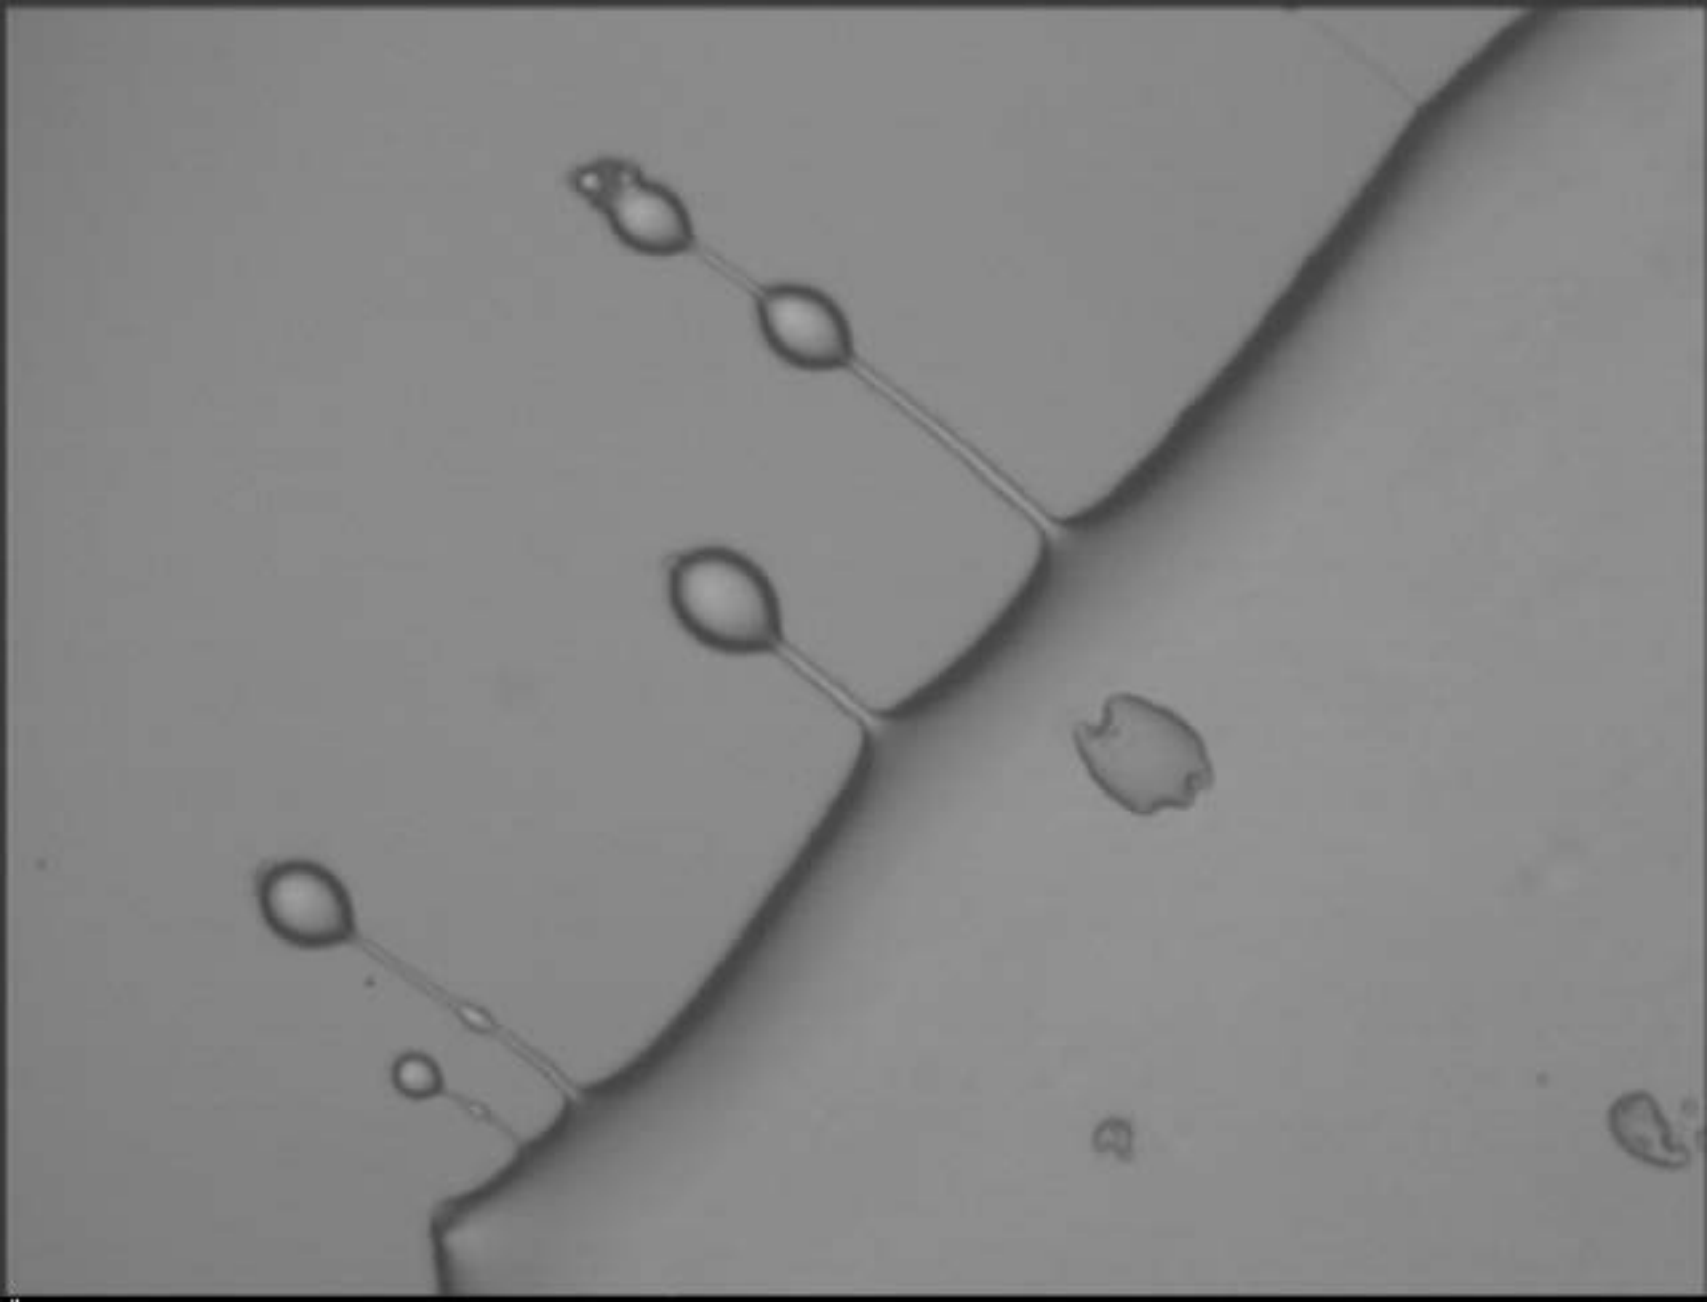

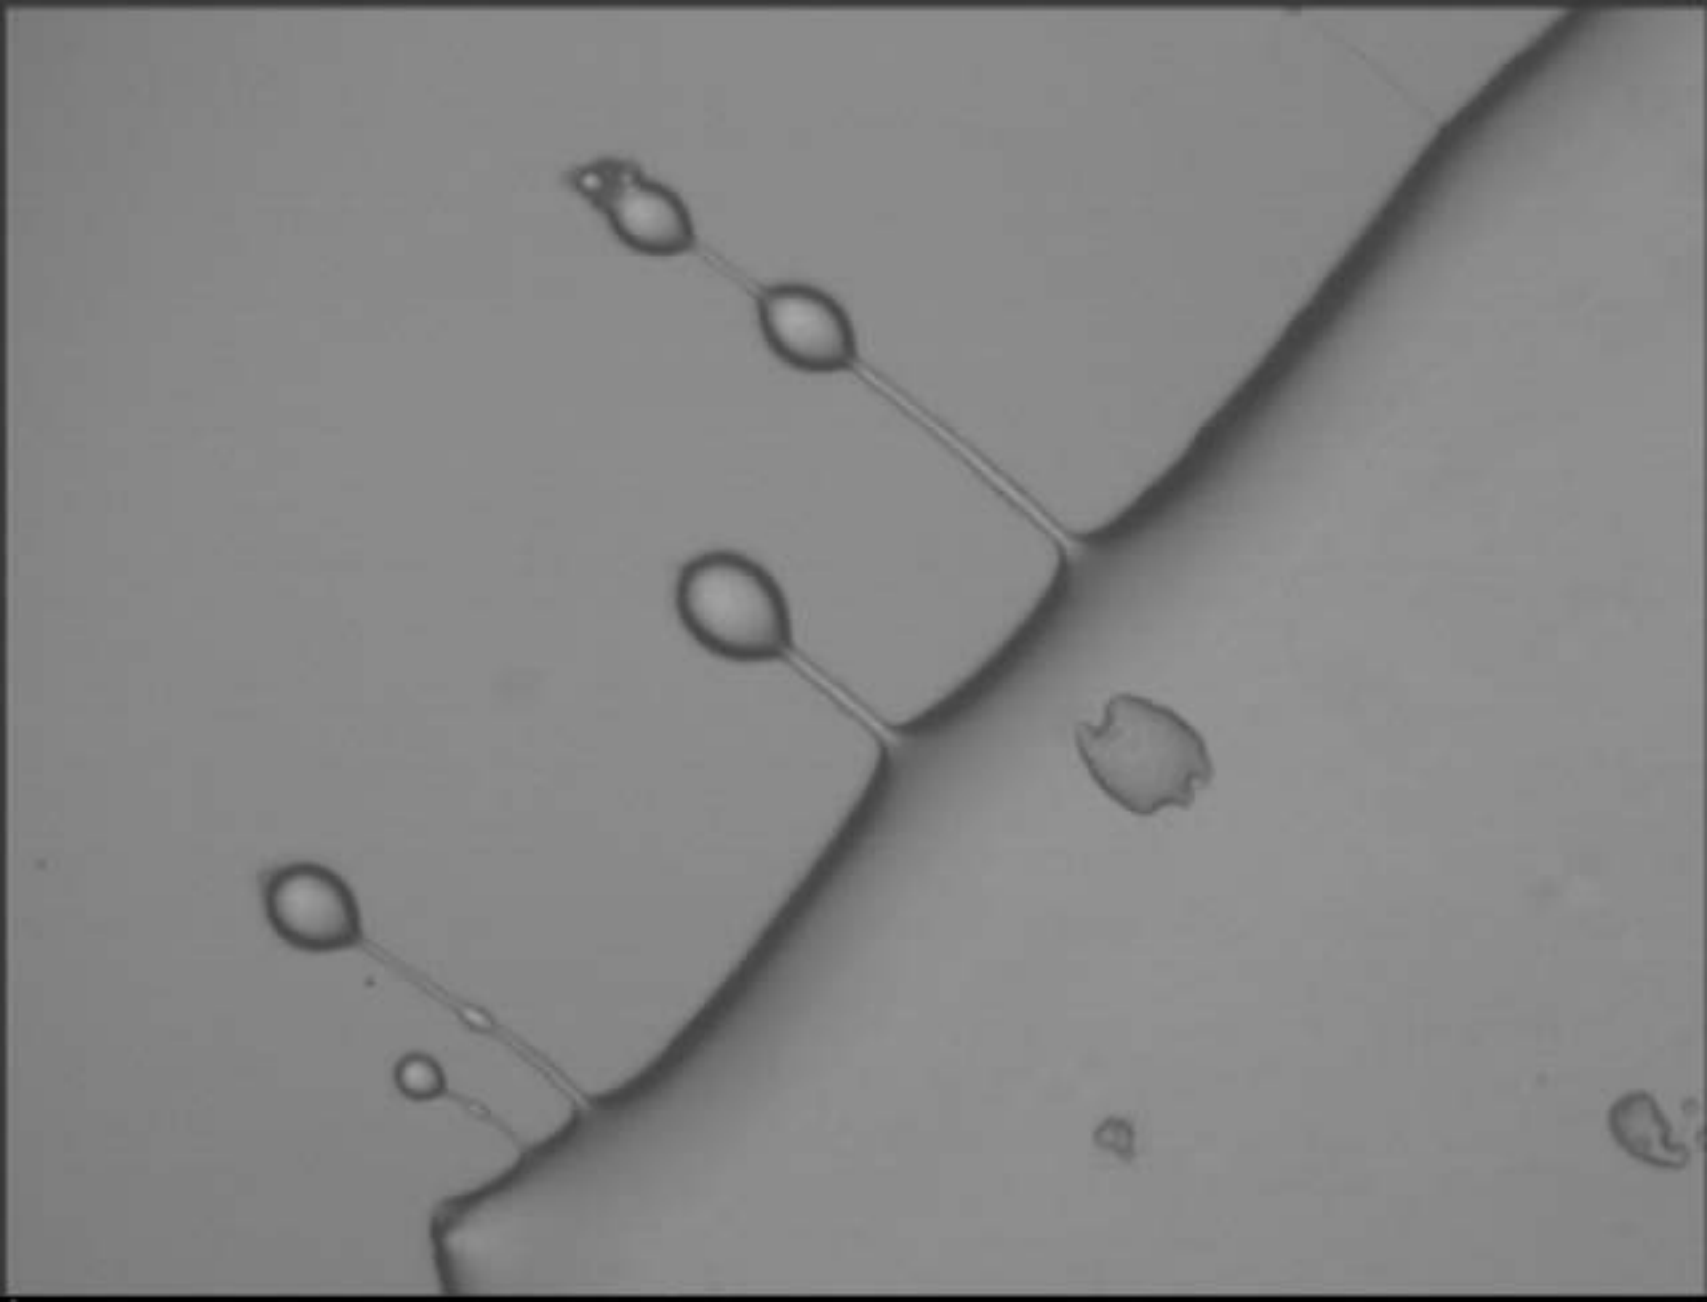

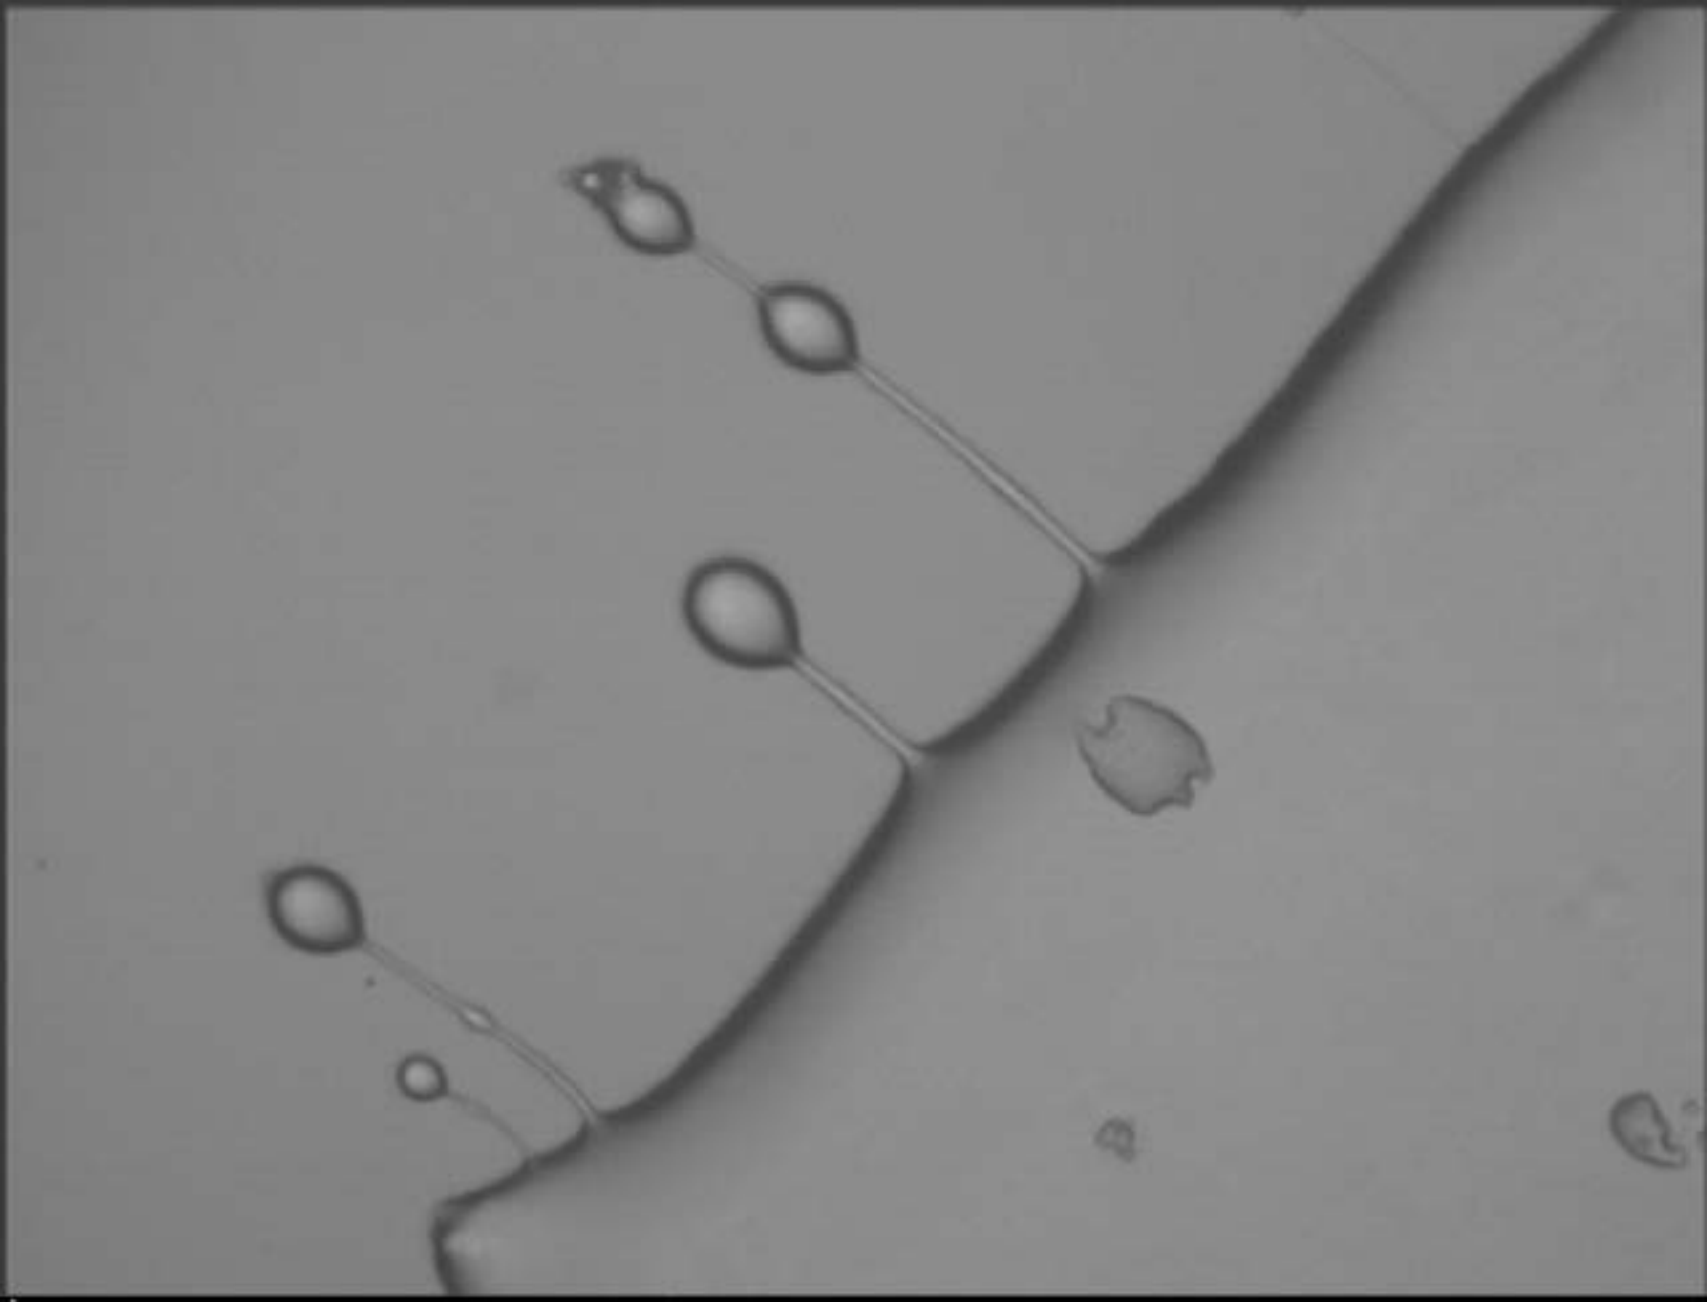

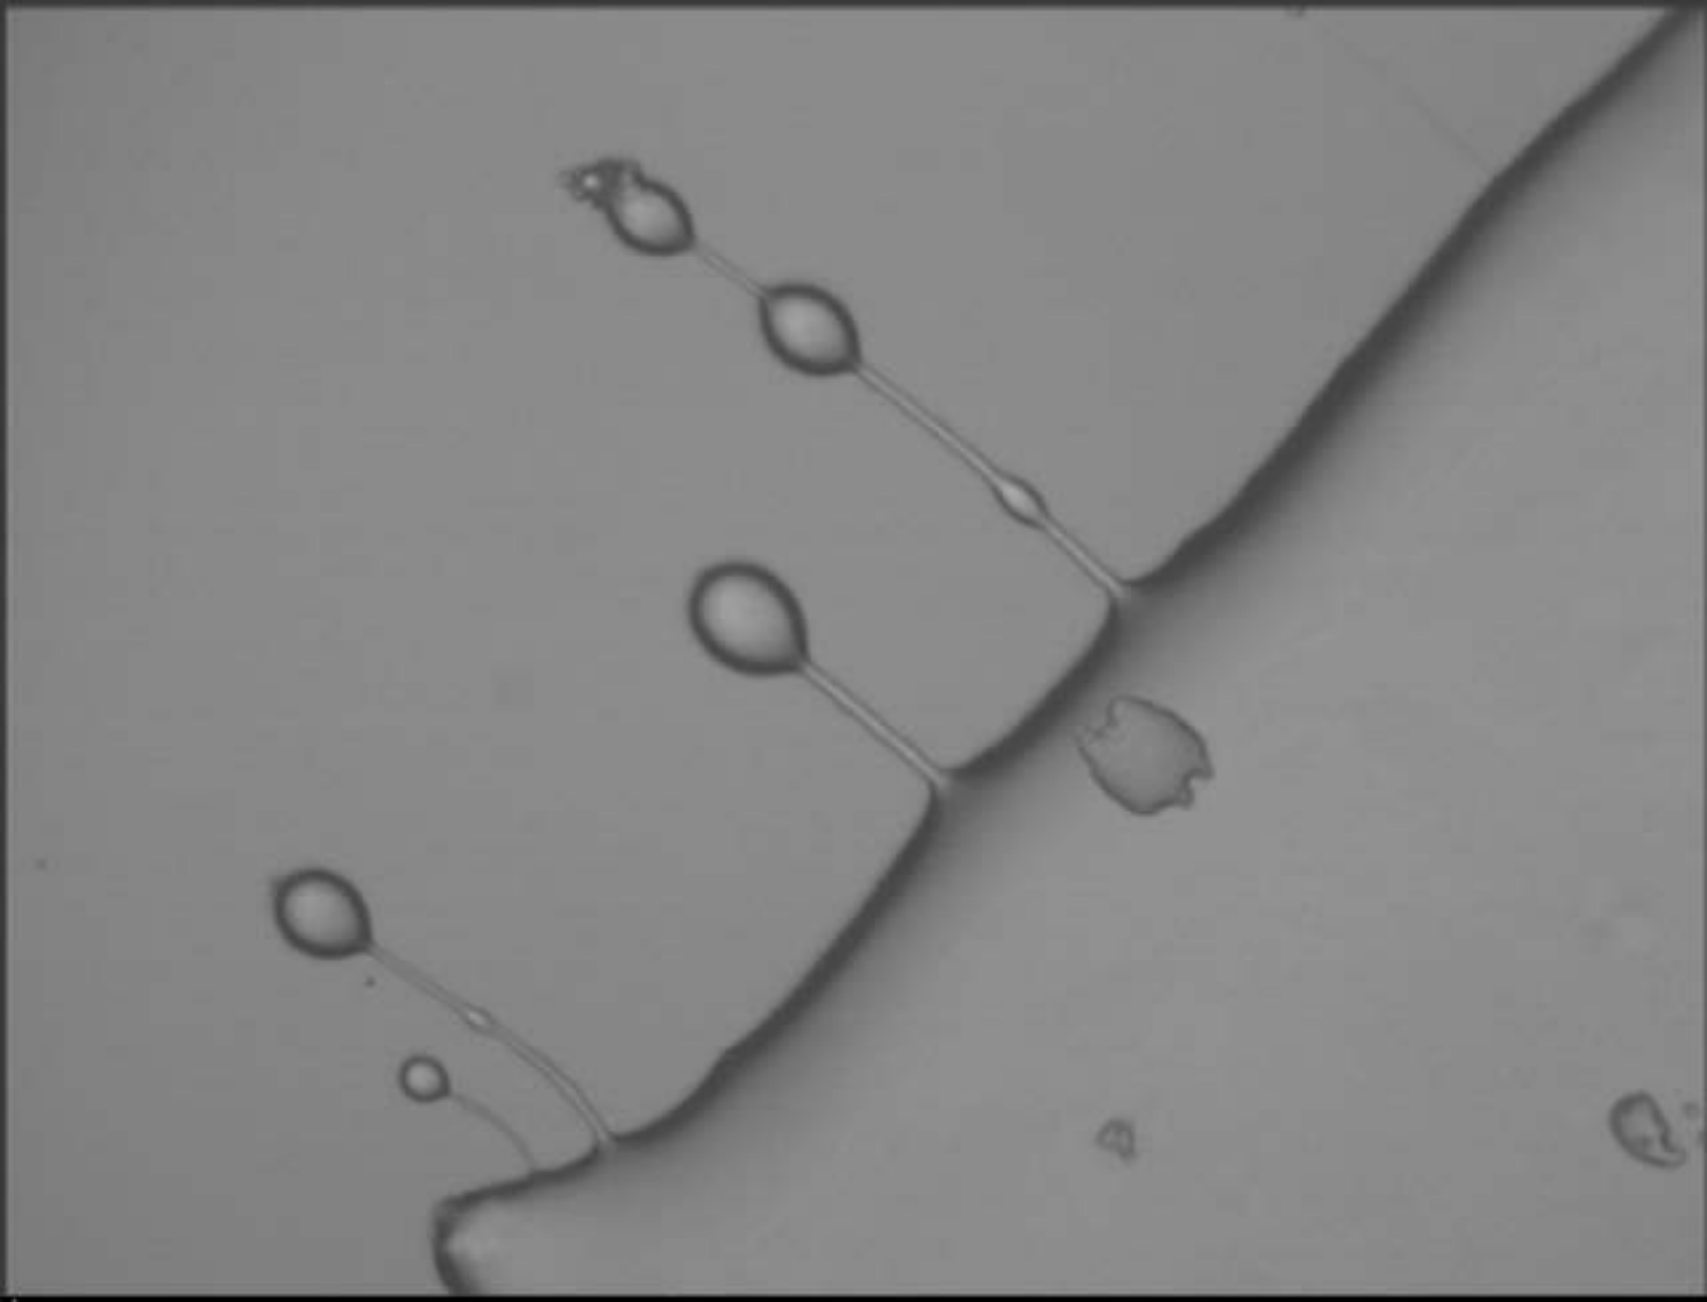

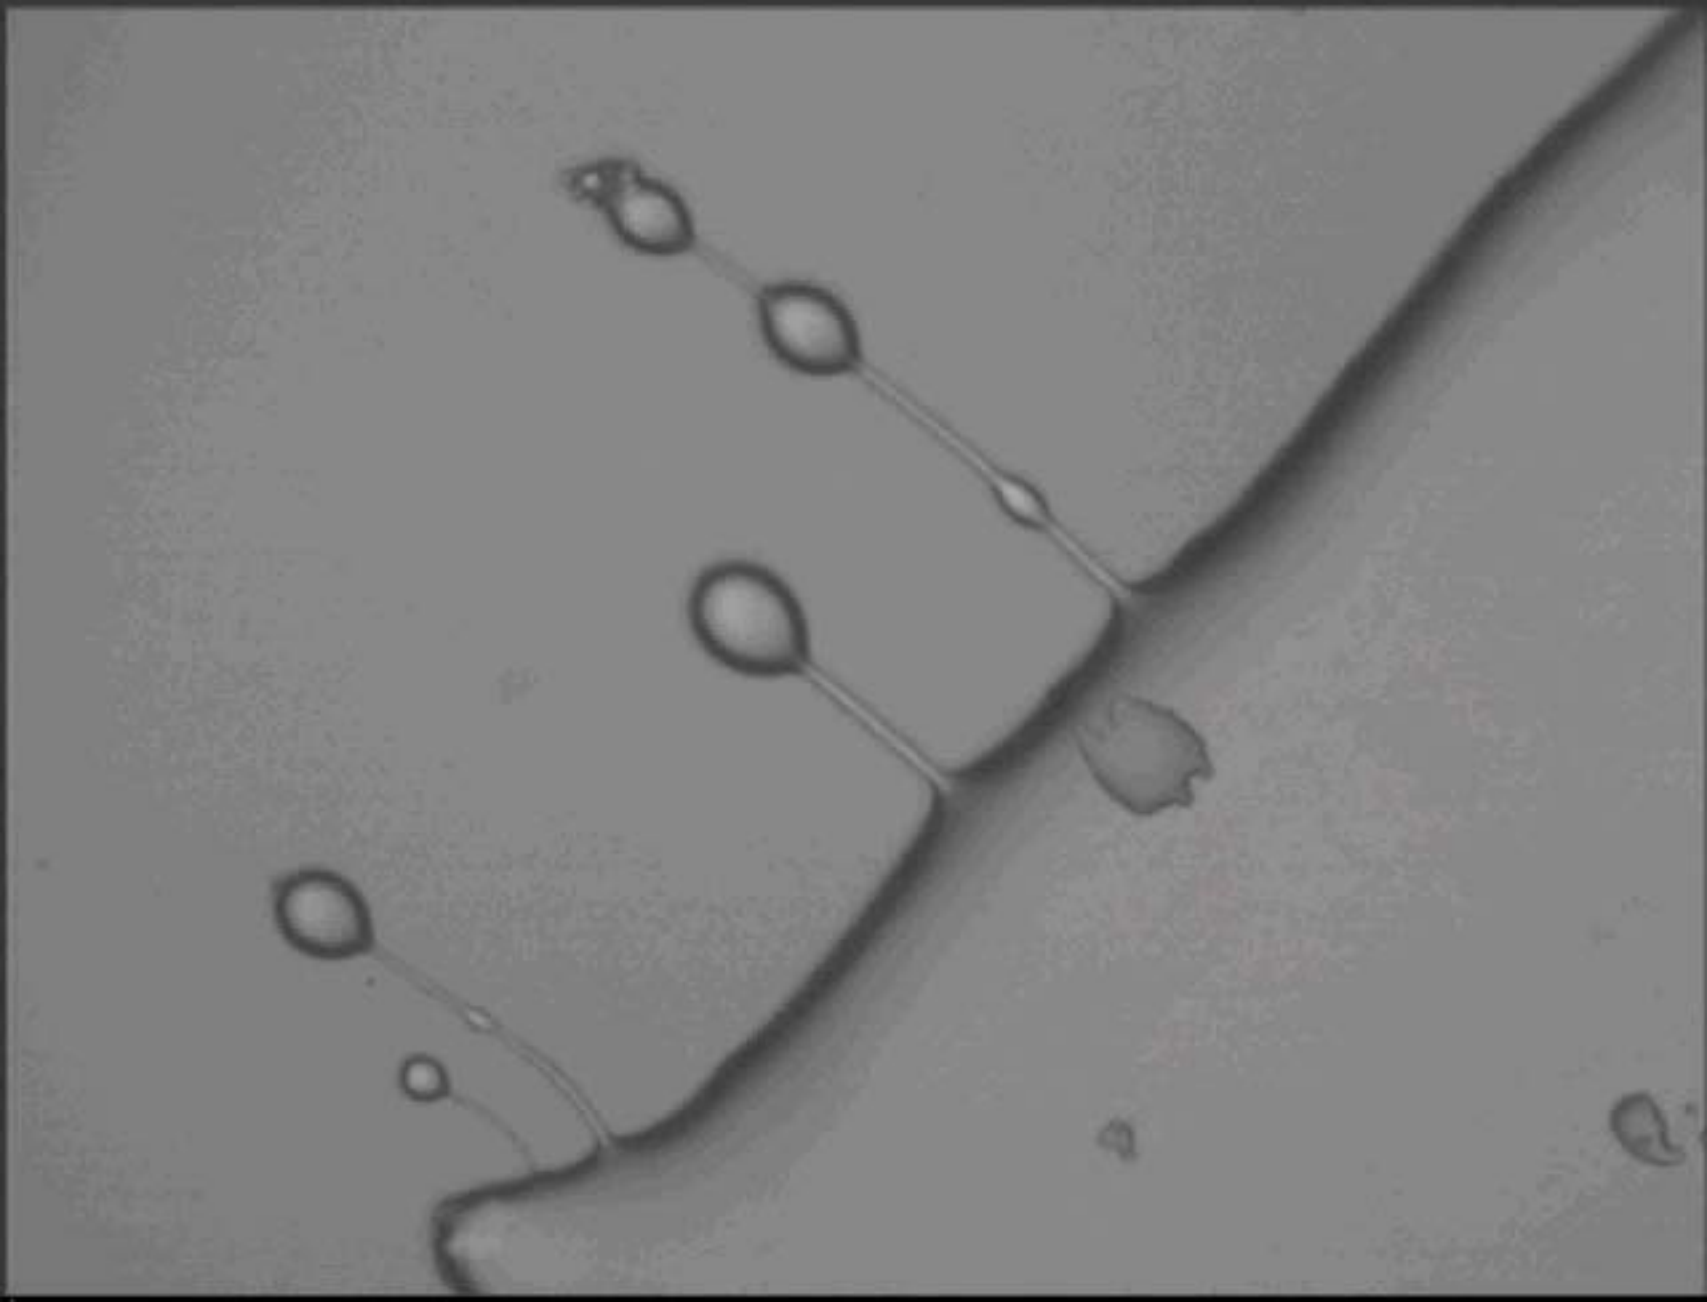

Supplement: c4sm01579g2.pdf [file c4sm01579g2.pdf]
